# Supplementary material
Source: publisher figshare collection journal article supplement (https://acs.figshare.com/ndownloader/files/24125867)

**Nickel(II)-Catalyzed Borylation of Alkenyl Methyl Ethers via C-O  
Bond Cleavage  
(Supporting Information)**

Xiaodong Qiu,\* Yangyang Li, Li Zhou, Peishan Chen, Fan Li, Yanan Zhang and Yong  
Ling\*

School of Pharmacy, Nantong University, 19 Qixiu Road, Nantong 226001, China

Email: qiuxiaodong@ntu.edu.cn; Lyyy111@sina.com

**CONTENTS**

|                                                                             |           |
|-----------------------------------------------------------------------------|-----------|
| <b>1. General Information.....</b>                                          | <b>2</b>  |
| <b>2. General Procedure for Synthesis of Enol Ethers.....</b>               | <b>2</b>  |
| <b>3. General Procedure for Borylation of Alkenyl Methyl Ethers.....</b>    | <b>9</b>  |
| <b>4. Experimental Procedure for Gram-Scale Borylation of 1a.....</b>       | <b>15</b> |
| <b>5. Experimental Procedure for the Synthesis of Piceatannol (7) .....</b> | <b>16</b> |
| <b>6. References.....</b>                                                   | <b>17</b> |
| <b>7. Spectroscopic Data.....</b>                                           | <b>18</b> |

## 1. General Information.

Unless otherwise noted, all reactions were performed under an nitrogen atmosphere using flame-dried glassware. Toluene and THF were distilled over Na, DCE and acetonitrile were distilled over CaH<sub>2</sub>. Cyclohexane was purchased as anhydrous solvent and used directly. All new compounds were fully characterized. NMR-spectra were recorded on Bruker AV-300, ARX-400 MHz or a ARX-600 Associated. <sup>1</sup>H NMR spectra data were reported as δ values in ppm relative to chloroform (δ 7.26), methanol (δ 3.30), or DMSO (δ 2.50) if collected in CDCl<sub>3</sub>, CD<sub>3</sub>OD, or DMSO-d<sub>6</sub>. <sup>13</sup>C NMR spectra data were reported as δ values in ppm relative to chloroform (δ 77.0) methanol (δ 49.0) or DMSO (δ 39.5) if collected in CDCl<sub>3</sub> (the carbon attached to B was not observed), CD<sub>3</sub>OD, DMSO-d<sub>6</sub>. <sup>1</sup>H NMR coupling constants were reported in Hz, and multiplicity was indicated as follows: s (singlet); d (doublet); t (triplet); q (quartet); quint (quintet); m (multiplet); dd (doublet of doublets); ddd (doublet of doublet of doublets); dddd (doublet of doublet of doublet of doublets); dt (doublet of triplets); td (triplet of doublets); ddt (doublet of doublet of triplets); dq (doublet of quartets); app (apparent); br (broad). Mass spectra were conducted at Micromass Q-ToF instrument (ESI) and Agilent Technologies 5973N (EI). All reactions were carried out in flame-dried 25 mL Schlenk tubes with Teflon screw caps under nitrogen. B<sub>2</sub>Pin<sub>2</sub> was vacuumized under room temperature for 12 h before use. Unless otherwise noted, materials obtained from commercial suppliers were used without further purification. Compounds **1a**,<sup>S1</sup> **1b**,<sup>S2</sup> **1d**,<sup>S3</sup> **1f**,<sup>S1</sup> **1g**,<sup>S1</sup> **1j**,<sup>S2</sup> **1l**,<sup>S4</sup> **1m**,<sup>S5</sup> **1p**,<sup>S5</sup> **1r**,<sup>S1</sup> **1s**<sup>S6</sup> were prepared according to literature reports.

## 2. General Procedure for Synthesis of Enol Ethers

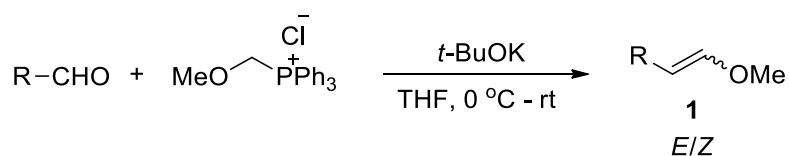

To a flame dried flask was added (methoxymethyl)triphenylphosphonium chloride (7.5 mmol, 2.57 g) and *t*-BuOK (9.0 mmol, 1.01 g), the flask was vacuumed and refilled with nitrogen three times and put under the ice bath. 15 mL anhydrous THF was added and the mixture was stirred for 30 min. After that, the solution of aldehyde (5.0 mmol) in THF (5 mL) was added dropwise into the reaction mixture, then the reaction was stirred under room temperature overnight. The reaction was monitored by TLC. After the aldehyde was disappeared, 30 mL water was added and stirred for another 5 min. The aqueous phase

was extracted by ethyl acetate and the combined organic phase was dried over anhydrous sodium sulfate. The mixture was then filtered and the solvent was removed under reduced pressure. Further purification through flash chromatography (PE : EA = 50 : 1) would provide the product **1** as a mixture with both *E* and *Z* isomers.

#### 1-(2-Methoxyvinyl)-3-methylbenzene (**1c**)

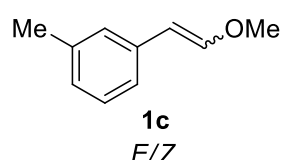

Compound **1c** was prepared from 3-methylbenzaldehyde in 92% yield as a colorless oil (680 mg). The spectral data were given for the mixture of both (*E*)-**1c** and (*Z*)-**1c** (*E*:*Z* = 51:49). <sup>1</sup>H NMR (400 MHz, CDCl<sub>3</sub>) δ 7.39 (d, *J* = 6.4 Hz, 2H), 7.23 – 7.13 (m, 2H), 7.09 – 7.01 (m, 3H), 7.00 – 6.94 (m, 2H), 6.13 (d, *J* = 7.0 Hz, 1H), 5.79 (d, *J* = 12.9 Hz, 1H), 5.20 (d, *J* = 7.0 Hz, 1H), 3.79 (s, 3H), 3.69 (s, 3H), 2.34 (s, 3H), 2.33 (s, 3H). <sup>13</sup>C NMR (101 MHz, CDCl<sub>3</sub>) δ 148.7, 147.8, 138.1, 137.6, 136.2, 135.7, 128.8, 128.5, 128.1, 126.5, 126.4, 125.9, 125.3, 122.2, 105.7, 105.0, 60.6, 56.5, 21.5, 21.4. ATR-FTIR (cm<sup>-1</sup>): 1421, 1262, 896, 733, 703. HRMS *m/z* (ESI) calcd for C<sub>10</sub>H<sub>13</sub>O (*M* + *H*)<sup>+</sup> 149.0961, found 149.0960.

#### 1-(*tert*-Butyl)-4-(2-methoxyvinyl)benzene (**1e**)

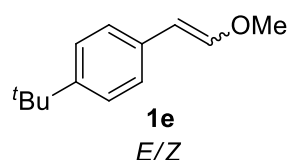

Compound **1e** was prepared from 4-(*tert*-butyl)benzaldehyde in 95% yield as a colorless oil (906 mg). The spectral data were given for the mixture of both (*E*)-**1e** and (*Z*)-**1e** (*E*:*Z* = 39:61). <sup>1</sup>H NMR (400 MHz, CDCl<sub>3</sub>) δ 7.55 – 7.45 (m, 2H), 7.36 – 7.24 (m, 3.28H), 7.21 – 7.13 (m, 1.49H), 7.01 (d, *J* = 13.0 Hz, 0.63H), 6.08 (d, *J* = 6.9 Hz, 1H), 5.79 (d, *J* = 13.0 Hz, 0.63H), 5.20 (d, *J* = 7.0 Hz, 1H), 3.73 (s, 3H), 3.65 (s, 2H), 1.30 (s, 15.75H). <sup>13</sup>C NMR (101 MHz, CDCl<sub>3</sub>) δ 148.53, 148.52, 148.3, 147.3, 133.4, 133.0, 127.8, 125.5, 125.0, 124.8, 105.4, 104.7, 60.5, 56.4, 34.4, 34.3, 31.29, 31.28. ATR-FTIR (cm<sup>-1</sup>): 1642, 1264, 1097, 895, 841, 733, 702. HRMS *m/z* (ESI) calcd for C<sub>13</sub>H<sub>19</sub>O (*M* + *H*)<sup>+</sup> 191.1430, found 191.1429.

#### 4-(2-Methoxyvinyl)-1,1'-biphenyl (**1h**)

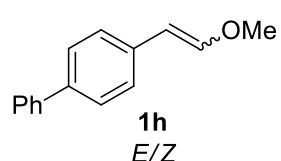

Compound **1h** was prepared from [1,1'-biphenyl]-4-carbaldehyde in 94% yield as a white solid (985 mg). The spectral data were given for the mixture of both (*E*)-**1h** and (*Z*)-**1h** (*E*:*Z* = 87:13). <sup>1</sup>H NMR (400 MHz, CDCl<sub>3</sub>) δ 7.68 – 7.57 (m, 2.50H), 7.56 – 7.49 (m, 2.26H), 7.56 – 7.49 (m, 2.26H), 7.47 – 7.37 (m, 2.23H), 7.36 – 7.28

(m, 3.13H), 7.11 (d,  $J = 13.0$  Hz, 1H), 6.18 (d,  $J = 7.0$  Hz, 0.15H), 5.86 (d,  $J = 13.0$  Hz, 1H), 5.28 (d,  $J = 7.0$  Hz, 0.15H), 3.81 (s, 0.40H), 3.72 (s, 3H).  $^{13}\text{C}$  NMR (101 MHz,  $\text{CDCl}_3$ )  $\delta$  149.0, 148.2, 141.1, 140.8, 138.4, 138.3, 135.4, 135.0, 128.72, 128.68, 128.5, 127.3, 126.99, 126.95, 126.9, 126.83, 126.76, 125.4, 105.2, 104.6, 60.7, 56.6. ATR-FTIR ( $\text{cm}^{-1}$ ): 3030, 2930, 1635, 1482, 1243, 1149, 1087, 95, 843, 760, 693. HRMS  $m/z$  (ESI) calcd for  $\text{C}_{15}\text{H}_{15}\text{O}$  ( $\text{M} + \text{H}$ ) $^+$  211.1117, found 211.1116.

#### (4-(2-Methoxyvinyl)phenyl)(methyl)sulfane (**1i**)

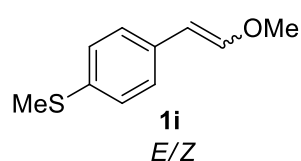

Compound **1i** was prepared from 4-(methylthio)benzaldehyde in 90% yield as a colorless oil (813 mg). The spectral data were given for the mixture of both (*E*)-**1i** and (*Z*)-**1i** ( $E:Z = 58:42$ ).  $^1\text{H}$  NMR (400 MHz,  $\text{CDCl}_3$ )  $\delta$  7.50 (d,  $J = 8.5$  Hz, 1.44H), 7.23 – 7.11 (m, 5.42H), 7.03 (d,  $J = 13.0$  Hz, 1H), 6.12 (d,  $J = 6.9$  Hz, 0.71H), 5.77 (d,  $J = 13.0$  Hz, 1H), 5.19 (d,  $J = 7.0$  Hz, 0.71H), 3.78 (s, 2.13H), 3.68 (s, 3H), 2.474 (s, 2.17H), 2.471 (s, 3H).  $^{13}\text{C}$  NMR (101 MHz,  $\text{CDCl}_3$ )  $\delta$  148.6, 147.7, 135.1, 135.0, 133.5, 133.0, 128.6, 127.4, 126.7, 125.5, 105.1, 104.5, 60.7, 56.5, 16.4, 16.2. ATR-FTIR ( $\text{cm}^{-1}$ ): 1423, 1265, 898, 734, 701. HRMS  $m/z$  (ESI) calcd for  $\text{C}_{10}\text{H}_{13}\text{OS}$  ( $\text{M} + \text{H}$ ) $^+$  181.0682, found 181.0681.

#### 1-Fluoro-2-(2-methoxyvinyl)benzene (**1k**)

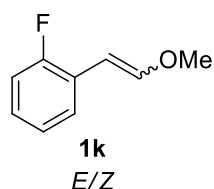

Compound **1k** was prepared from 2-fluorobenzaldehyde in 87% yield as a colorless oil (662 mg). The spectral data were given for the mixture of both (*E*)-**1k** and (*Z*)-**1k** ( $E:Z = 60:40$ ).  $^1\text{H}$  NMR (400 MHz,  $\text{CDCl}_3$ )  $\delta$  8.05 (td,  $J = 7.7, 2.5$  Hz, 0.66H), 7.33 – 7.23 (m, 1H), 7.18 (d,  $J = 13.0$  Hz, 1H), 7.15 – 6.96 (m, 4.95H), 6.24 (d,  $J = 7.1$  Hz, 0.67H), 5.88 (d,  $J = 13.1$  Hz, 1H), 5.50 (d,  $J = 7.0$  Hz, 0.67H), 3.80 (s, 2.09H), 3.72 (s, 3H).  $^{13}\text{C}$  NMR (101 MHz,  $\text{CDCl}_3$ )  $\delta$  160.4 (d,  $J = 39.6$  Hz), 158.0 (d,  $J = 40.7$  Hz), 150.7 (d,  $J = 6.6$  Hz), 149.1 (d,  $J = 2.2$  Hz), 130.0 (d,  $J = 3.3$  Hz), 126.9 (d,  $J = 8.3$  Hz), 126.6 (d,  $J = 8.2$  Hz), 126.5 (d,  $J = 4.4$  Hz), 124.1, 124.0 (d,  $J = 3.4$  Hz), 124.0, 123.7 (d,  $J = 3.6$  Hz), 123.6 (d,  $J = 11.9$  Hz), 115.5 (d,  $J = 22.2$  Hz), 114.7 (d,  $J = 22.2$  Hz), 98.2 (d,  $J = 2.8$  Hz), 96.4 (d,  $J = 7.6$  Hz), 60.7, 56.4.  $^{19}\text{F}$  NMR (376 MHz,  $\text{CDCl}_3$ )  $\delta$  -118.8, -117.5. ATR-FTIR ( $\text{cm}^{-1}$ ): 1420, 1262, 894, 732, 702. HRMS  $m/z$  (ESI) calcd for  $\text{C}_9\text{H}_9\text{FO}$  ( $\text{M} + \text{H}$ ) $^+$  153.0710, found 153.0713.

#### *N,N*-diethyl-4-(2-methoxyvinyl)benzamide (**1n**)

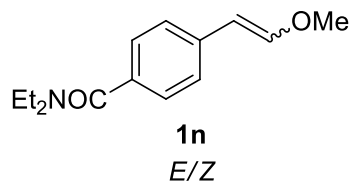

Compound **1n** was prepared from *N,N*-diethyl-4-formylbenzamide in 85% yield as a colorless oil (995 mg). The spectral data were given

for the mixture of both (*E*)-**1n** and (*Z*)-**1n** (*E*:*Z* = 36:64). <sup>1</sup>H NMR (400 MHz, CDCl<sub>3</sub>) δ 7.62 – 7.52 (m, 2H), 7.35 – 7.26 (m, 3.61H),

7.26 – 7.21 (m, 1.14H), 7.09 (d, *J* = 13.0 Hz, 0.58H), 6.18 (d, *J* = 7.0 Hz, 1H), 5.80 (d, *J* = 13.0 Hz, 0.56H), 5.23 (d, *J* = 7.0 Hz, 1H), 3.80 (s, 3H), 3.70 (s, 1.69H), 3.65 – 3.10 (m, 6.45H), 1.35 – 0.97 (m, 9.98H). <sup>13</sup>C NMR (101 MHz, CDCl<sub>3</sub>) δ 171.4, 171.2, 149.6, 148.7, 137.4, 136.8, 134.2, 134.1, 127.9, 126.8, 126.3, 124.8, 104.9, 104.3, 60.8, 56.5, 43.2, 39.2, 14.2, 12.9. ATR-FTIR (cm<sup>-1</sup>): 1624, 1424, 1263, 1095, 895, 731, 702. HRMS *m/z* (ESI) calcd for C<sub>14</sub>H<sub>20</sub>NO<sub>2</sub> (*M* + *H*)<sup>+</sup> 234.1489, found 234.1488.

#### 1-(2-Methoxyvinyl)-3,5-dimethylbenzene (**1o**)

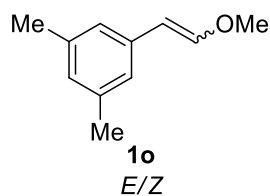

Compound **1o** was prepared from 3,5-dimethylbenzaldehyde in 95% yield as a colorless oil (770 mg). The spectral data were given for the mixture of

both (*E*)-**1o** and (*Z*)-**1o** (*E*:*Z* = 50:50). <sup>1</sup>H NMR (400 MHz, CDCl<sub>3</sub>) δ 7.22 (s, 2H), 7.05 (d, *J* = 13.0 Hz, 1H), 6.93 – 6.75 (m, 4H), 6.11 (d, *J* = 7.0 Hz, 1H),

5.78 (d, *J* = 13.0 Hz, 1H), 5.18 (d, *J* = 7.0 Hz, 1H), 3.79 (s, 3H), 3.69 (s, 3H), 2.36 – 2.22 (m, 12H). <sup>13</sup>C NMR (101 MHz, CDCl<sub>3</sub>) δ 148.6, 147.6, 138.0, 137.5, 136.1, 135.6, 127.5, 127.4, 126.0, 123.0, 105.7, 105.0, 60.6, 56.4, 21.3, 21.3. ATR-FTIR (cm<sup>-1</sup>): 1421, 1264, 1100, 895, 731, 702. HRMS *m/z* (ESI) calcd for C<sub>11</sub>H<sub>15</sub>O (*M* + *H*)<sup>+</sup> 163.1117, found 163.1117.

#### 5-(2-Methoxyvinyl)-2,3-dihydrobenzofuran (**1q**)

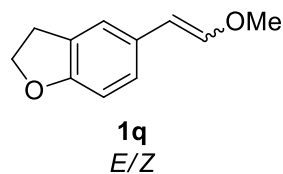

Compound **1q** was prepared from 2,3-dihydrobenzofuran-5-carbaldehyde in 94% yield as a colorless oil (825 mg). The spectral data

were given for the mixture of both (*E*)-**1q** and (*Z*)-**1q** (*E*:*Z* = 45:55). <sup>1</sup>H NMR (400 MHz, CDCl<sub>3</sub>) δ 7.55 (s, 1H), 7.29 (d, *J* = 8.2 Hz, 1H), 7.11 (s,

0.81H), 6.99 (d, *J* = 8.2 Hz, 0.80H), 6.93 (d, *J* = 13.0 Hz, 0.81H), 6.78 – 6.68 (m, 1.77H), 6.04 (d, *J* = 7.0 Hz, 1H), 5.80 (d, *J* = 13.0 Hz, 0.81H), 5.19 (d, *J* = 7.0 Hz, 1H), 4.63 – 4.50 (m, 3.74H), 3.76 (s, 3H), 3.67 (s, 2.43H), 3.24 – 3.13 (m, 3.78H). <sup>13</sup>C NMR (101 MHz, CDCl<sub>3</sub>) δ 158.3, 158.0, 147.0, 145.7, 128.6, 128.5, 128.0, 127.3, 126.7, 125.0, 124.7, 121.3, 109.1, 108.7, 105.5, 104.9, 71.1, 71.1, 60.3, 56.3, 29.6, 29.6. ATR-FTIR (cm<sup>-1</sup>): 1646, 1490, 1264, 1106, 984, 735, 702. HRMS *m/z* (ESI) calcd for C<sub>11</sub>H<sub>13</sub>O<sub>2</sub>

(M + H)<sup>+</sup> 177.0910, found 177.0909.

### 9-Ethyl-3-(2-methoxyvinyl)-9*H*-carbazole (**1t**)

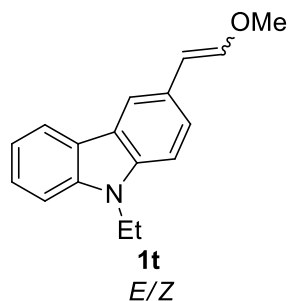

Compound **1t** was prepared from 9-ethyl-9*H*-carbazole-3-carbaldehyde in 86% yield as a pale yellow solid (1.08 g). The spectral data were given for the mixture of both (*E*)-**1t** and (*Z*)-**1t** (*E*:*Z* = 50:50). <sup>1</sup>H NMR (400 MHz, CDCl<sub>3</sub>) δ 8.36 – 8.27 (m, 1H), 8.15 – 7.96 (m, 2H), 7.95 – 7.85 (m, 1H), 7.74 – 7.63 (m, 1H), 7.43 – 7.32 (m, 2H), 7.31 – 7.10 (m, 7H), 7.09 – 6.99 (m, 1H), 6.08 – 5.91 (m, 2H), 5.43 – 5.30 (m, 1H), 4.22 – 4.04 (m, 4H),

3.71 (s, 3H), 3.63 (s, 3H), 1.34 – 1.14 (m, 6H). <sup>13</sup>C NMR (101 MHz, CDCl<sub>3</sub>) δ 147.2, 145.9, 140.2, 138.5, 138.3, 127.1, 127.0, 126.5, 125.6, 125.4, 123.3, 123.2, 123.1, 122.9, 122.8, 120.5, 120.4, 120.0, 118.61, 118.55, 116.9, 108.6, 108.43, 108.35, 108.0, 106.4, 105.9, 60.5, 56.5, 37.5, 37.5, 13.8. ATR-FTIR (cm<sup>-1</sup>): 1421, 1267, 894, 734, 703. HRMS *m/z* (ESI) calcd for C<sub>17</sub>H<sub>18</sub>NO<sub>2</sub> (M + H)<sup>+</sup> 252.1383, found 252.1383.

### 1-(2-Methoxyvinyl)cyclohex-1-ene (**1v**)

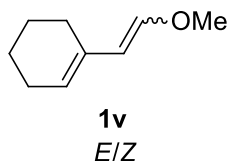

Compound **1v** was prepared from cyclohex-1-enecarbaldehyde in 68% yield as a colorless oil (469 mg). Due to the instability of **1v** under room temperature, it was put into the borylation reaction immediately after purification by column

chromatography on silica gel. The NMR spectral data of **1v** were deficient but it could be easily judged from GC-MS that **1v** was the mixture of *E/Z* isomers (42:58). EI-MS (*m/z*, relative intensity, *rt* = 5.118 min): 138 (M<sup>+</sup>, 100), 123 (36), 109 (52), 106 (20), 95 (45), 91 (42), 79 (56), 67 (31), 53(14). EI-MS (*m/z*, relative intensity, *rt* = 5.158 min): 138 (M<sup>+</sup>, 100), 123 (35), 109 (50), 106 (19), 95 (43), 91 (41), 79 (54), 67 (30), 53(13). EI-MS (*m/z*, relative intensity, *rt* = 5.456 min): 138 (M<sup>+</sup>, 100), 123 (40), 109 (54), 106 (21), 95 (49), 91 (46), 79 (59), 67 (33), 53(14). EI-MS (*m/z*, relative intensity, *rt* = 5.479 min): 138 (M<sup>+</sup>, 100), 123 (39), 109 (52), 106 (20), 95 (47), 91 (44), 79 (58), 67 (32), 53(14). ATR-FTIR (cm<sup>-1</sup>): 1266, 1091, 894, 734, 704. HRMS *m/z* (ESI) calcd for C<sub>9</sub>H<sub>15</sub>O (M + H)<sup>+</sup> 139.1117, found 139.1117.

# Chromatogram Plot Report

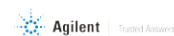

|                |                    |              |            |      |                                  |
|----------------|--------------------|--------------|------------|------|----------------------------------|
| Name           | qxdhuanjxjijiam1   | Rack Pos.    | Instrument | GCMS | Operator                         |
| Inj. Vol. (ul) | 1                  | Plate Pos.   | IRM Status |      |                                  |
| Data File      | qxdhuanjxjijiam1.D | Method (Acq) | Comment    |      | Acq. Time (Local)                |
|                |                    | 3min.M       |            |      | 6/24/2020 1:59:20 PM (UTC+08:00) |

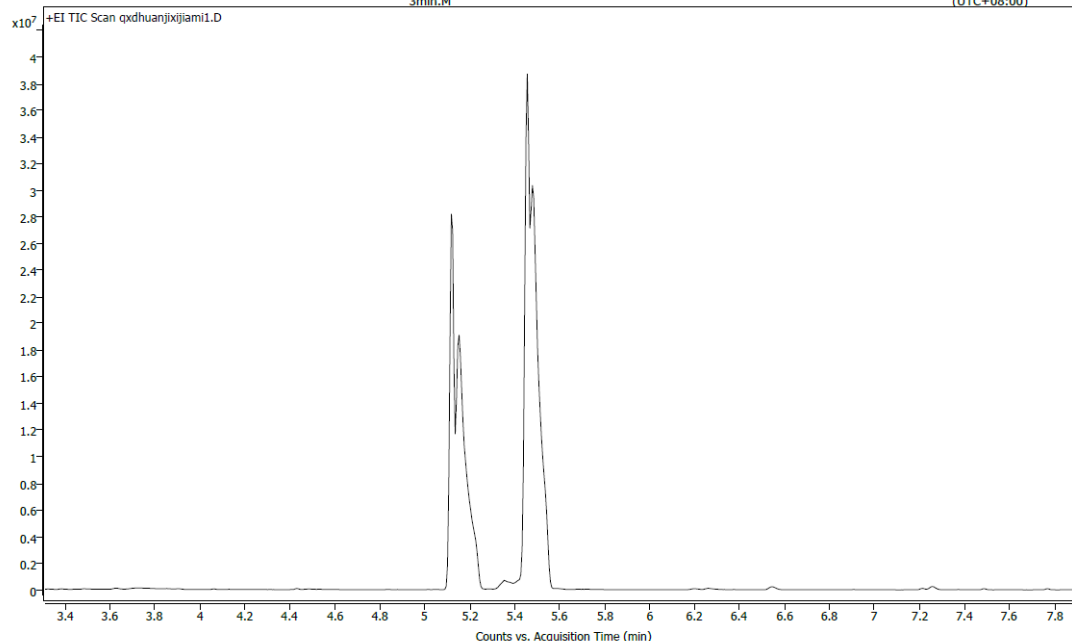

Page 1 of 1

Generated at 3:08 PM on 6/24/2020

## (S)-1-(2-methoxyvinyl)-4-(prop-1-en-2-yl)cyclohex-1-ene (**1w**)

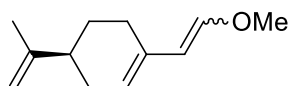

**1w**  
E/Z

Compound **1w** was prepared from (-)-perillaldehyde in 60% yield as a colorless oil (535 mg). Due to the instability of **1w** under room temperature, it was put into the borylation reaction immediately after purification by column chromatography on silica gel. The NMR spectral data of **1w** were

deficient but it could be easily judged from GC-MS that two isomers existed (47:53). EI-MS ( $m/z$ , relative intensity,  $rt = 7.436$  min): 178 ( $M^+$ , 36), 137 (91), 110 (100), 95 (85), 91 (28), 79 (47), 67 (35), 53(13). EI-MS ( $m/z$ , relative intensity,  $rt = 7.728$  min): 178 ( $M^+$ , 37), 137 (91), 110 (100), 95 (87), 91 (29), 79 (49), 67 (37), 53(14). ATR-FTIR ( $cm^{-1}$ ): 1649, 1623, 1267, 1091, 893, 733, 704. HRMS  $m/z$  (ESI) calcd for  $C_{12}H_{19}O$  ( $M + H$ ) $^+$  179.1430, found 179.1429.

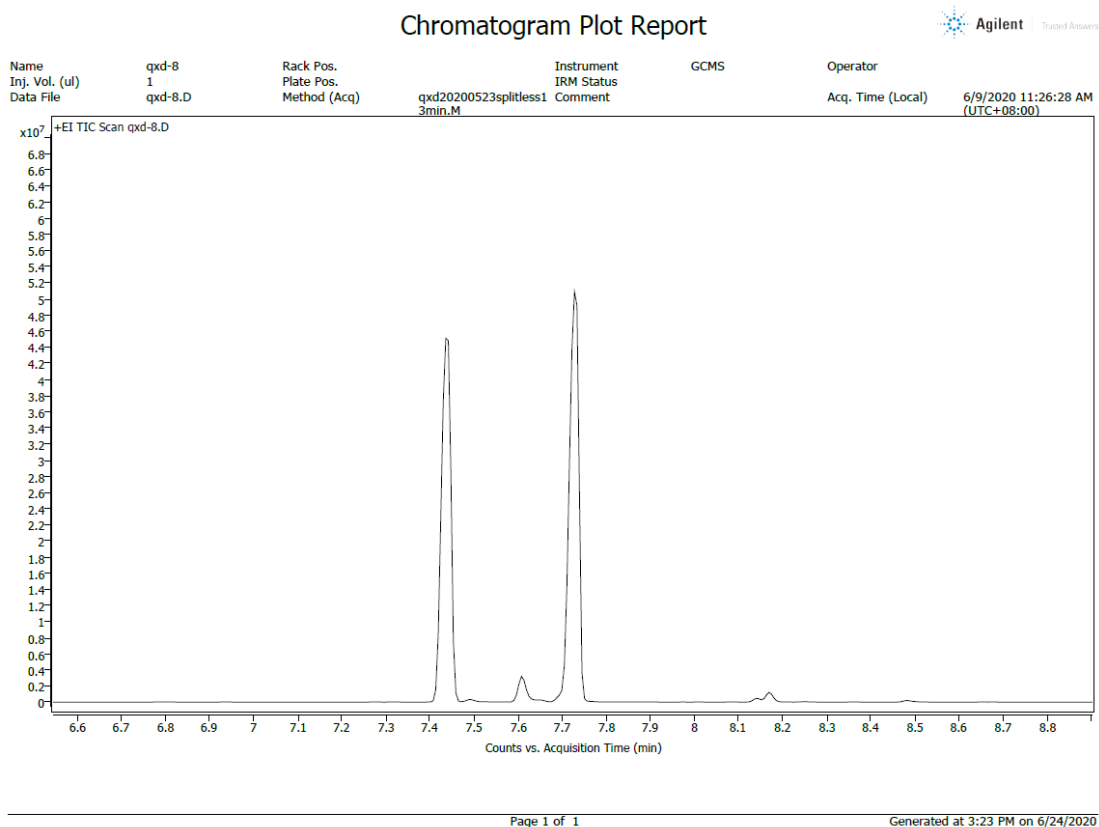

**(1*R*,5*S*)-2-(2-methoxyvinyl)-6,6-dimethylbicyclo[3.1.1]hept-2-ene (1*x*)**

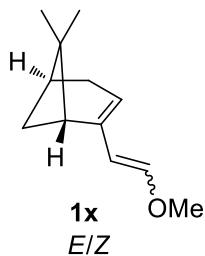

Compound **1*x*** was prepared from (-)-myrtenal in 53% yield as a colorless oil (474 mg). Due to the instability of **1*x*** under room temperature, it was put into the borylation reaction immediately after purification by column chromatography on silica gel. The NMR spectral data of **1*x*** were deficient but it could be easily judged from GC-MS that two isomers existed (45:55). EI-MS (*m/z*, relative intensity, *rt* = 6.417 min): 178 (*M*<sup>+</sup>, 72), 163 (62), 135(95), 131(65), 122 (32), 110 (21), 105 (80), 103(84), 91 (100), 86 (38), 77(55), 65 (24), 53(21). EI-MS (*m/z*, relative intensity, *rt* = 6.812 min): 178 (*M*<sup>+</sup>, 77), 163 (56), 135(84), 131(64), 117 (30), 110 (22), 105 (79), 103(83), 91 (100), 86 (61), 77(54), 73 (20), 65 (24), 53(20). ATR-FTIR (cm<sup>-1</sup>): 1422, 1263, 896, 735, 703. HRMS *m/z* (ESI) calcd for C<sub>12</sub>H<sub>19</sub>O (*M* + H)<sup>+</sup> 179.1430, found 179.1429.



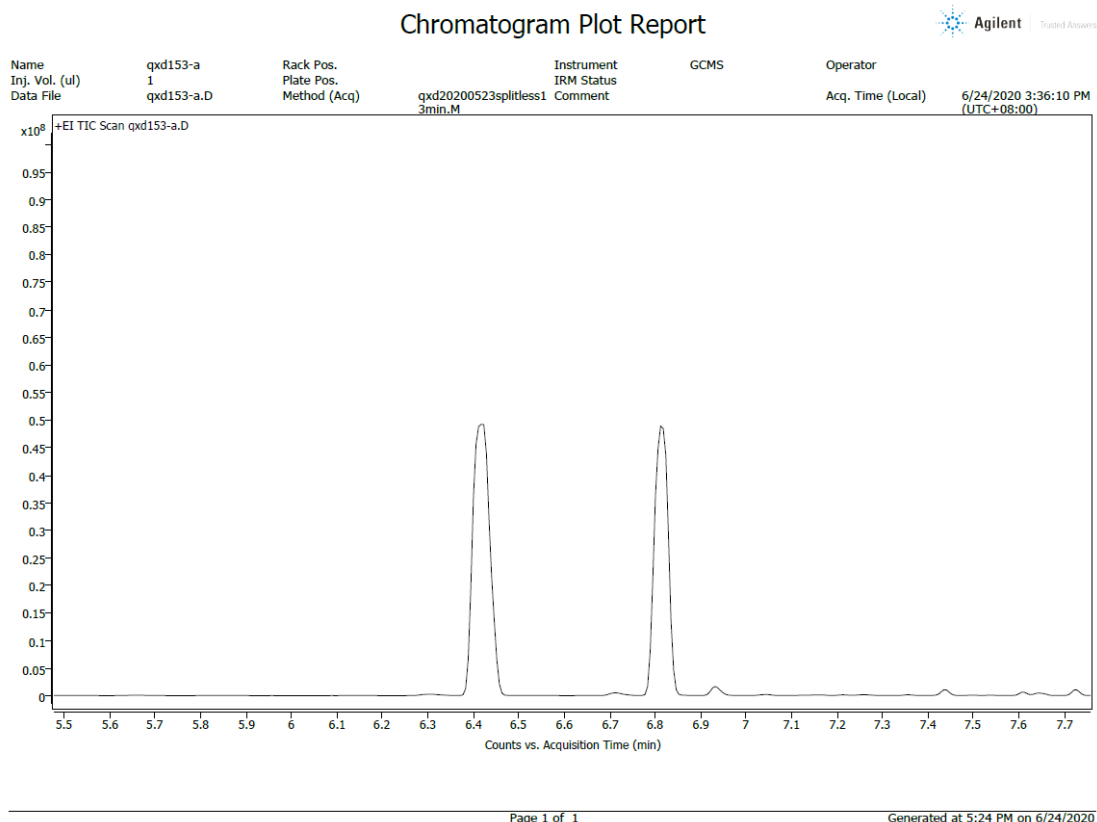

### 3. General Procedure for Borylation of Alkenyl Methyl Ethers

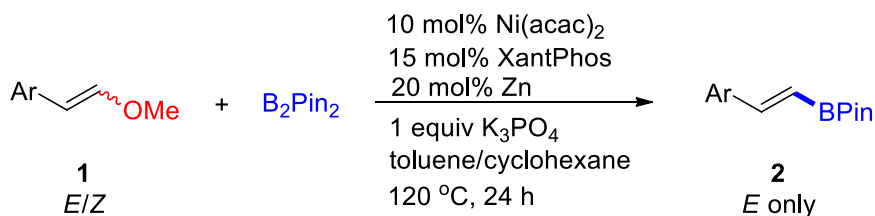

To a flame dried 25 mL Schlenk tube was added Ni(acac)<sub>2</sub> (0.05 mmol, 12.8 mg), XantPhos (0.075 mol, 43.4 mg) and Zn (0.1 mmol, 6.5 mg), then B<sub>2</sub>Pin<sub>2</sub> (1.0 mmol, 254.0 mg) and K<sub>3</sub>PO<sub>4</sub> (0.5 mmol, 106.1 mg) were added. The tube was vacuumed and refilled with nitrogen three times followed by the addition of anhydrous toluene (1.25 mL) and cyclohexane (3.75 mL). Substrates **1** (0.5 mmol) was also added with a syringe under nitrogen atmosphere and the plug is screwed. After that, The reaction was stirred under 120 °C in the heating module for 24 h. Then the mixture was cooled to room temperature, the solvents were removed under reduced pressure and the crude product was purified through flash chromatography with petroleum ether and ethyl acetate as the eluent to afford the pure product **2**.

#### (*E*)-4,4,5,5-tetramethyl-2-styryl-1,3,2-dioxaborolane (**2a**)

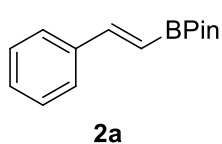

Eluent: petroleum ether/ethyl acetate (100:1). Colorless oil (93.1 mg, 81%).

<sup>1</sup>H NMR (400 MHz, CDCl<sub>3</sub>) δ 7.53 – 7.46 (m, 2H), 7.40 (d, *J* = 18.4 Hz, 1H), 7.37 – 7.26 (m, 3H), 6.18 (d, *J* = 18.4 Hz, 1H), 1.32 (s, 12H). <sup>13</sup>C NMR (101

MHz, CDCl<sub>3</sub>)  $\delta$  149.5, 137.4, 128.9, 128.5, 127.0, 83.3, 24.8. The spectra data are consistent with those in literature report.<sup>S7</sup>

**(*E*)-4,4,5,5-tetramethyl-2-(4-methylstyryl)-1,3,2-dioxaborolane (2b)**

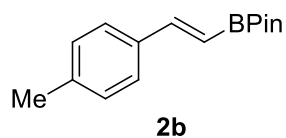

Eluent: petroleum ether/ethyl acetate (100:1). Colorless oil (97.6 mg, 80%). <sup>1</sup>H NMR (400 MHz, CDCl<sub>3</sub>)  $\delta$  7.44 – 7.31 (m, 3H), 7.14 (d, *J* = 7.9 Hz, 2H), 6.11 (d, *J* = 18.4 Hz, 1H), 2.35 (s, 3H), 1.31 (s, 12H). <sup>13</sup>C NMR (101 MHz, CDCl<sub>3</sub>)  $\delta$  149.4, 139.0, 134.8, 129.3, 127.0, 83.3, 24.8, 21.3. The spectra data are consistent with those in literature report.<sup>S7</sup>

**(*E*)-4,4,5,5-tetramethyl-2-(3-methylstyryl)-1,3,2-dioxaborolane (2c)**

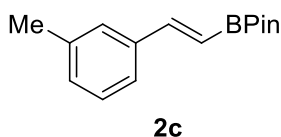

Eluent: petroleum ether/ethyl acetate (100:1). Colorless oil (93.8 mg, 77%). <sup>1</sup>H NMR (400 MHz, CDCl<sub>3</sub>)  $\delta$  7.37 (d, *J* = 18.4 Hz, 1H), 7.33 – 7.27 (m, 2H), 7.23 (t, *J* = 7.8 Hz, 1H), 7.11 (d, *J* = 7.5 Hz, 1H), 6.15 (d, *J* = 18.4 Hz, 1H), 2.35 (s, 3H), 1.31 (s, 12H). <sup>13</sup>C NMR (101 MHz, CDCl<sub>3</sub>)  $\delta$  149.6, 138.1, 137.4, 129.7, 128.4, 127.8, 124.2, 83.3, 24.8, 21.4. The spectra data are consistent with those in literature report.<sup>S8</sup>

**(*E*)-4,4,5,5-tetramethyl-2-(2-methylstyryl)-1,3,2-dioxaborolane (2d)**

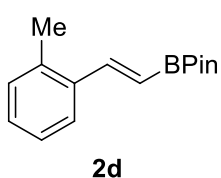

Eluent: petroleum ether/ethyl acetate (100:1). Colorless oil (70.7 mg, 58%). <sup>1</sup>H NMR (400 MHz, CDCl<sub>3</sub>)  $\delta$  7.66 (d, *J* = 18.3 Hz, 1H), 7.61 – 7.51 (m, 1H), 7.23 – 7.09 (m, 3H), 6.10 (d, *J* = 18.3 Hz, 1H), 2.43 (s, 3H), 1.32 (s, 12H). <sup>13</sup>C NMR (101 MHz, CDCl<sub>3</sub>)  $\delta$  147.1, 136.6, 136.2, 130.3, 128.5, 126.0, 125.7, 83.2, 24.8, 19.8. The spectra data are consistent with those in literature report.<sup>S7</sup>

**(*E*)-2-(4-(*tert*-butyl)styryl)-4,4,5,5-tetramethyl-1,3,2-dioxaborolane (2e)**

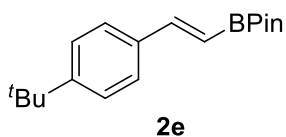

Eluent: petroleum ether/ethyl acetate (100:1). White solid (107.1 mg, 75%). <sup>1</sup>H NMR (400 MHz, CDCl<sub>3</sub>)  $\delta$  7.49 – 7.31 (m, 5H), 6.13 (d, *J* = 18.4 Hz, 1H), 1.32 (s, 21H). <sup>13</sup>C NMR (101 MHz, CDCl<sub>3</sub>)  $\delta$  152.1, 149.4, 134.7, 126.8, 125.5, 83.2, 34.7, 31.2, 24.8. The spectra data are consistent with those in literature report.<sup>S7</sup>

**(*E*)-2-(4-methoxystyryl)-4,4,5,5-tetramethyl-1,3,2-dioxaborolane (2f)**

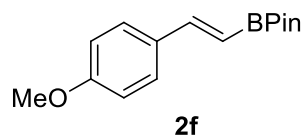

Eluent: petroleum ether/ethyl acetate (80:1). Colorless oil (106.7 mg, 82%).  $^1\text{H}$  NMR (400 MHz,  $\text{CDCl}_3$ )  $\delta$  7.49 – 7.39 (m, 2H), 7.35 (d,  $J$  = 18.4 Hz, 1H), 6.92 – 6.80 (m, 2H), 6.01 (d,  $J$  = 18.4 Hz, 1H), 3.81 (s, 3H), 1.31 (s, 12H).  $^{13}\text{C}$  NMR (101 MHz,  $\text{CDCl}_3$ )  $\delta$  160.3, 149.0, 130.4, 128.4, 113.9, 83.2, 55.3, 24.8. The spectra data are consistent with those in literature report.<sup>S8</sup>

**(E)-N,N-dimethyl-4-(2-(4,4,5,5-tetramethyl-1,3,2-dioxaborolan-2-yl)vinyl)aniline (2g)**

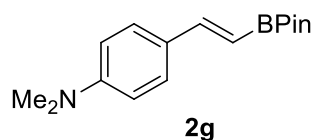

Eluent: petroleum ether/ethyl acetate (80:1). White solid (120.2 mg, 88%).  $^1\text{H}$  NMR (400 MHz,  $\text{CDCl}_3$ )  $\delta$  7.45 – 7.37 (m, 2H), 7.34 (d,  $J$  = 18.3 Hz, 1H), 6.67 (d,  $J$  = 8.8 Hz, 2H), 5.92 (d,  $J$  = 18.3 Hz, 1H), 2.98 (s, 6H), 1.31 (s, 12H).  $^{13}\text{C}$  NMR (101 MHz,  $\text{CDCl}_3$ )  $\delta$  150.9, 149.8, 128.4, 125.9, 111.9, 83.0, 40.3, 24.8. The spectra data are consistent with those in literature report.<sup>S7</sup>

**(E)-2-(2-([1,1'-biphenyl]-4-yl)vinyl)-4,4,5,5-tetramethyl-1,3,2-dioxaborolane (2h)**

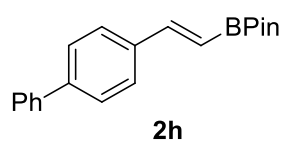

Eluent: petroleum ether/ethyl acetate (100:1). White solid (116.2 mg, 76%).  $^1\text{H}$  NMR (400 MHz,  $\text{CDCl}_3$ )  $\delta$  7.65 – 7.52 (m, 6H), 7.49 – 7.38 (m, 3H), 7.38 – 7.31 (m, 1H), 6.21 (d,  $J$  = 18.4 Hz, 1H), 1.33 (s, 12H).  $^{13}\text{C}$  NMR (101 MHz,  $\text{CDCl}_3$ )  $\delta$  149.0, 141.6, 140.5, 136.4, 128.8, 127.5, 127.4, 127.2, 127.0, 83.4, 24.8. The spectra data are consistent with those in literature report.<sup>S8</sup>

**(E)-4,4,5,5-tetramethyl-2-(4-(methylthio)styryl)-1,3,2-dioxaborolane (2i)**

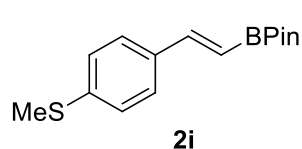

Eluent: petroleum ether/ethyl acetate (80:1). Colorless oil (117.3 mg, 85%).  $^1\text{H}$  NMR (400 MHz,  $\text{CDCl}_3$ )  $\delta$  7.44 – 7.37 (m, 2H), 7.34 (d,  $J$  = 18.4 Hz, 1H), 7.24 – 7.17 (m, 2H), 6.11 (d,  $J$  = 18.4 Hz, 1H), 2.48 (s, 3H), 1.31 (s, 12H).  $^{13}\text{C}$  NMR (101 MHz,  $\text{CDCl}_3$ )  $\delta$  148.8, 139.6, 134.3, 127.4, 126.1, 83.3, 24.8, 15.4. The spectra data are consistent with those in literature report.<sup>S9</sup>

**(E)-2-(4-fluorostyryl)-4,4,5,5-tetramethyl-1,3,2-dioxaborolane (2j)**

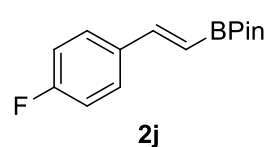

Eluent: petroleum ether/ethyl acetate (100:1). Colorless oil (91.6 mg, 74%).  $^1\text{H}$  NMR (400 MHz,  $\text{CDCl}_3$ )  $\delta$  7.51 – 7.39 (m, 2H), 7.35 (d,  $J$  = 18.4 Hz, 1H), 7.02 (t,  $J$  = 8.7 Hz, 2H), 6.07 (d,  $J$  = 18.4 Hz, 1H), 1.31 (s, 12H).  $^{13}\text{C}$  NMR (101 MHz,  $\text{CDCl}_3$ )  $\delta$  163.1 (d,  $J$  = 248.6 Hz), 148.1, 133.7 (d,  $J$  = 3.2 Hz), 128.7 (d,  $J$  = 8.2 Hz), 115.5

(d,  $J = 21.7$  Hz), 83.4, 24.8.  $^{19}\text{F}$  NMR (376 MHz,  $\text{CDCl}_3$ )  $\delta$  -112.4. The spectra data are consistent with those in literature report.<sup>S8</sup>

**(*E*)-2-(2-fluorostyryl)-4,4,5,5-tetramethyl-1,3,2-dioxaborolane (2k)**

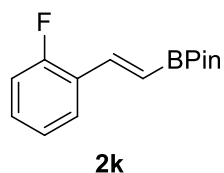

Eluent: petroleum ether/ethyl acetate (100:1). Colorless oil (74.5 mg, 60%).  $^1\text{H}$  NMR (400 MHz,  $\text{CDCl}_3$ )  $\delta$  7.66 – 7.51 (m, 2H), 7.36 – 7.19 (m, 1H), 7.16 – 7.07 (m, 1H), 7.03 (ddd,  $J = 10.8, 8.2, 1.2$  Hz, 1H), 6.24 (d,  $J = 18.6$  Hz, 1H), 1.31 (s, 12H).  $^{13}\text{C}$  NMR (101 MHz,  $\text{CDCl}_3$ )  $\delta$  160.7 (d,  $J = 251.6$  Hz), 141.3 (d,  $J = 4.1$

Hz), 130.2 (d,  $J = 8.6$  Hz), 127.4 (d,  $J = 3.3$  Hz), 125.4 (d,  $J = 11.6$  Hz), 124.1 (d,  $J = 3.6$  Hz), 115.8 (d,  $J = 22.1$  Hz), 83.4, 24.8.  $^{19}\text{F}$  NMR (376 MHz,  $\text{CDCl}_3$ )  $\delta$  -117.7. The spectra data are consistent with those in literature report.<sup>S7</sup>

**(*E*)-4,4,5,5-tetramethyl-2-(4-(trifluoromethyl)styryl)-1,3,2-dioxaborolane (2l)**

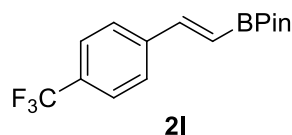

Eluent: petroleum ether/ethyl acetate (100:1). Colorless oil (104.4 mg, 70%).  $^1\text{H}$  NMR (400 MHz,  $\text{CDCl}_3$ )  $\delta$  7.63 – 7.52 (m, 4H), 7.40 (d,  $J = 18.4$  Hz, 1H), 6.26 (d,  $J = 18.4$  Hz, 1H), 1.32 (s, 12H).  $^{13}\text{C}$  NMR (101 MHz,  $\text{CDCl}_3$ )  $\delta$  147.7, 140.7, 130.4 (q,  $J = 32.4$  Hz), 128.3, 127.1, 125.5 (q,  $J = 3.9$  Hz), 124.1 (q,  $J = 272.0$

Hz), 83.6, 24.8.  $^{19}\text{F}$  NMR (376 MHz,  $\text{CDCl}_3$ )  $\delta$  -62.6. The spectra data are consistent with those in literature report.<sup>S8</sup>

**(*E*)-methyl 4-(2-(4,4,5,5-tetramethyl-1,3,2-dioxaborolan-2-yl)vinyl)benzoate (2m)<sup>[6]</sup>**

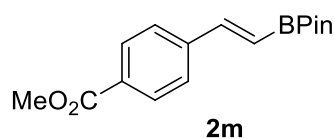

Eluent: petroleum ether/ethyl acetate (60:1). White solid (97.8 mg, 68%).  $^1\text{H}$  NMR (400 MHz,  $\text{CDCl}_3$ )  $\delta$  7.99 (d,  $J = 8.4$  Hz, 2H), 7.58 – 7.46 (m, 2H), 7.40 (d,  $J = 18.4$  Hz, 1H), 6.26 (d,  $J = 18.4$  Hz, 1H), 3.90

(s, 3H), 1.30 (s, 12H).  $^{13}\text{C}$  NMR (101 MHz,  $\text{CDCl}_3$ )  $\delta$  166.7, 148.1, 141.6, 130.1, 129.9, 126.8, 83.5, 52.1, 24.8. The spectra data are consistent with those in literature report.<sup>S10</sup>

**(*E*)-*N,N*-diethyl-4-(2-(4,4,5,5-tetramethyl-1,3,2-dioxaborolan-2-yl)vinyl)benzamide (2n)**

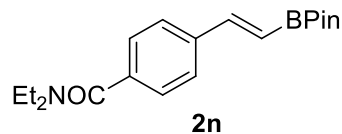

Eluent: petroleum ether/ethyl acetate (10:1). White solid (125.0 mg, 76%).  $^1\text{H}$  NMR (400 MHz,  $\text{CDCl}_3$ )  $\delta$  7.54 – 7.45 (m, 2H), 7.43 – 7.29 (m, 3H), 6.19 (d,  $J = 18.5$  Hz, 1H), 3.73 – 3.70 (m, 4H), 1.31 (s, 12H),

1.30 – 1.00 (m, 6H).  $^{13}\text{C}$  NMR (101 MHz,  $\text{CDCl}_3$ )  $\delta$  170.9, 148.5, 138.2, 137.5, 127.0, 126.7, 83.4, 43.2,

39.2, 24.8, 14.2, 12.9. ATR-FTIR (cm<sup>-1</sup>): 1421, 1268, 892, 734, 702. HRMS m/z (ESI) calcd for C<sub>19</sub>H<sub>29</sub>BNO<sub>3</sub> (M + H)<sup>+</sup> 330.2235, found 330.2233.

**(E)-2-(3,5-dimethylstyryl)-4,4,5,5-tetramethyl-1,3,2-dioxaborolane (2o)**

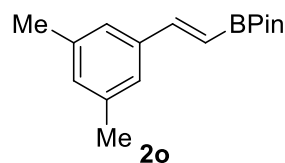

Eluent: petroleum ether/ethyl acetate (100:1). Colorless oil (81.3 mg, 63%). <sup>1</sup>H NMR (400 MHz, CDCl<sub>3</sub>) δ 7.34 (d, *J* = 18.4 Hz, 1H), 7.11 (brs, 2H), 6.94 (brs, 1H), 6.13 (d, *J* = 18.4 Hz, 1H), 2.31 (s, 6H), 1.31 (s, 12H).

<sup>13</sup>C NMR (101 MHz, CDCl<sub>3</sub>) δ 149.8, 137.9, 137.4, 130.6, 124.9, 83.2, 24.8, 21.2. ATR-FTIR (cm<sup>-1</sup>): 1264, 907, 729, 706, 650. HRMS m/z (ESI) calcd for C<sub>16</sub>H<sub>24</sub>BO<sub>2</sub> (M + H)<sup>+</sup> 259.1864, found 259.1864.

**(E)-2-(3,5-dimethoxystyryl)-4,4,5,5-tetramethyl-1,3,2-dioxaborolane (2p)**

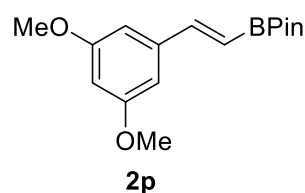

Eluent: petroleum ether/ethyl acetate (50:1). White solid (92.6 mg, 64%). <sup>1</sup>H NMR (400 MHz, CDCl<sub>3</sub>) δ 7.32 (d, *J* = 18.4 Hz, 1H), 6.65 (d, *J* = 2.2 Hz, 2H), 6.42 (t, *J* = 2.3 Hz, 1H), 6.14 (d, *J* = 18.4 Hz, 1H), 3.79 (s, 6H), 1.31 (s, 12H). <sup>13</sup>C NMR (101 MHz, CDCl<sub>3</sub>) δ 160.8, 149.3, 139.5,

104.9, 101.3, 83.4, 55.3, 24.8. The spectra data are consistent with those in literature report.<sup>S11</sup>

**(E)-2-(2-(2,3-dihydrobenzofuran-5-yl)vinyl)-4,4,5,5-tetramethyl-1,3,2-dioxaborolane (2q)**

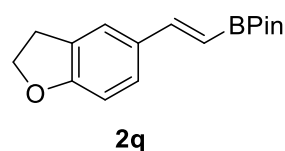

Eluent: petroleum ether/ethyl acetate (50:1). Colorless oil (89.6 mg, 66%). <sup>1</sup>H NMR (400 MHz, CDCl<sub>3</sub>) δ 7.40 – 7.28 (m, 2H), 7.24 (dd, *J* = 8.3, 1.8 Hz, 1H), 6.74 (d, *J* = 8.3 Hz, 1H), 5.96 (d, *J* = 18.3 Hz, 1H), 4.58 (t, *J* =

8.7 Hz, 2H), 3.20 (t, *J* = 8.7 Hz, 2H), 1.30 (s, 12H). <sup>13</sup>C NMR (101 MHz, CDCl<sub>3</sub>) δ 161.0, 149.5, 130.5, 128.1, 127.5, 123.2, 109.2, 83.2, 71.6, 29.4, 24.8. ATR-FTIR (cm<sup>-1</sup>): 1423, 1261, 895, 733, 705. HRMS m/z (ESI) calcd for C<sub>16</sub>H<sub>22</sub>BO<sub>3</sub> (M + H)<sup>+</sup> 273.1657, found 273.1653.

**(E)-4,4,5,5-tetramethyl-2-(2-(naphthalen-2-yl)vinyl)-1,3,2-dioxaborolane (2r)**

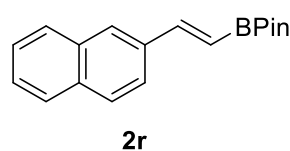

Eluent: petroleum ether/ethyl acetate (100:1). Yellowish solid (110.8 mg, 79%). <sup>1</sup>H NMR (400 MHz, CDCl<sub>3</sub>) δ 7.88 – 7.76 (m, 4H), 7.70 (dd, *J* = 8.6, 1.7 Hz, 1H), 7.57 (d, *J* = 18.4 Hz, 1H), 7.51 – 7.42 (m, 2H), 6.29 (d, *J* =

18.4 Hz, 1H), 1.34 (s, 12H). <sup>13</sup>C NMR (101 MHz, CDCl<sub>3</sub>) δ 149.5, 134.9, 133.7, 133.4, 128.4, 128.2, 128.0, 127.7, 126.4, 126.3, 123.4, 83.4, 24.8. The spectra data are consistent with those in literature report.<sup>S7</sup>

**(E)-4,4,5,5-tetramethyl-2-(2-phenylprop-1-en-1-yl)-1,3,2-dioxaborolane (2s)**

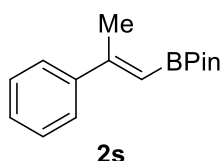

Eluent: petroleum ether/ethyl acetate (100:1). Colorless oil (57.0 mg, 47%).  $^1\text{H}$  NMR (400 MHz,  $\text{CDCl}_3$ )  $\delta$  7.54 – 7.46 (m, 2H), 7.37 – 7.26 (m, 3H), 5.75 (s, 1H), 2.41 (s, 3H), 1.32 (s, 12H).  $^{13}\text{C}$  NMR (101 MHz,  $\text{CDCl}_3$ )  $\delta$  157.8, 143.8, 128.1, 127.9, 125.8, 82.9, 24.9, 20.1. The spectra data are consistent with those in literature report.<sup>S7</sup>

**(E)-9-ethyl-3-(1-(4,4,5,5-tetramethyl-1,3,2-dioxaborolan-2-yl)prop-1-en-2-yl)-9H-carbazole (2t)**

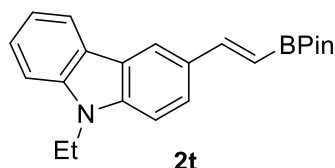

Eluent: petroleum ether/ethyl acetate (80:1). Yellowish solid (140.3 mg, 81%).  $^1\text{H}$  NMR (400 MHz,  $\text{CDCl}_3$ )  $\delta$  8.23 (d,  $J$  = 1.7 Hz, 1H), 8.09 (dt,  $J$  = 7.8, 1.0 Hz, 1H), 7.73 – 7.58 (m, 2H), 7.48 (ddd,  $J$  = 8.2, 7.0, 1.2 Hz, 1H), 7.43 – 7.32 (m, 2H), 7.29 – 7.20 (m, 1H), 6.20 (d,  $J$  = 18.4 Hz, 1H), 4.35 (q,  $J$  = 7.2 Hz, 2H), 1.43 (t,  $J$  = 7.2 Hz, 3H), 1.35 (s, 12H).  $^{13}\text{C}$  NMR (101 MHz,  $\text{CDCl}_3$ )  $\delta$  150.6, 140.5, 140.3, 128.8, 125.8, 124.8, 123.0, 123.0, 120.4, 119.8, 119.1, 108.6, 108.5, 83.1, 37.6, 24.8, 13.8. ATR-FTIR ( $\text{cm}^{-1}$ ): 2977, 1472, 1455, 1332, 1233, 1146, 1124, 745, 728, 670, 630. HRMS  $m/z$  (ESI) calcd for  $\text{C}_{22}\text{H}_{27}\text{BNO}_2$  ( $\text{M} + \text{H}$ )<sup>+</sup> 348.2129, found 348.2122.

**2H-benzo[e][1,2]oxaborinin-2-ol (2u)**

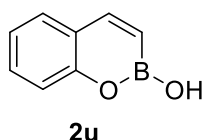

Eluent: petroleum ether/ethyl acetate (40:1). White solid (44.7 mg, 61%).  $^1\text{H}$  NMR (400 MHz,  $\text{CDCl}_3$ )  $\delta$  7.78 (d,  $J$  = 11.9 Hz, 1H), 7.47 – 7.31 (m, 2H), 7.28 – 7.23 (m, 1H), 7.15 (td,  $J$  = 7.4, 1.2 Hz, 1H), 6.22 (d,  $J$  = 11.8 Hz, 1H), 4.54 (brs, 1H).  $^{13}\text{C}$  NMR (101 MHz,  $\text{CDCl}_3$ )  $\delta$  152.3, 149.4, 129.4, 128.7, 124.4, 122.3, 118.4. The spectra data was consistent with literature report.<sup>S12</sup>

**(E)-2-(2-(cyclohex-1-en-1-yl)vinyl)-4,4,5,5-tetramethyl-1,3,2-dioxaborolane (2v)**

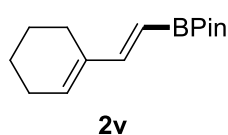

Eluent: petroleum ether/ethyl acetate (80:1). Colorless oil (65.6 mg, 56%).  $^1\text{H}$  NMR (400 MHz,  $\text{CDCl}_3$ )  $\delta$  7.02 (d,  $J$  = 18.2 Hz, 1H), 5.96 (t,  $J$  = 3.9 Hz, 1H), 5.42 (d,  $J$  = 18.2 Hz, 1H), 2.22 – 2.07 (m, 4H), 1.76 – 1.47 (m, 4H), 1.27 (s, 12H).  $^{13}\text{C}$  NMR (101 MHz,  $\text{CDCl}_3$ )  $\delta$  153.2, 137.1, 134.3, 83.0, 26.2, 24.8, 23.7, 22.4, 22.3. The spectra data was consistent with literature report.<sup>S13</sup> ATR-FTIR ( $\text{cm}^{-1}$ ): 1424, 1264, 893, 735, 703. HRMS  $m/z$  (ESI) calcd for  $\text{C}_{14}\text{H}_{24}\text{BO}_2$  ( $\text{M} + \text{H}$ )<sup>+</sup> 235.1864, found 235.1859.

**(*S,E*)-4,4,5,5-tetramethyl-2-(2-(4-(prop-1-en-2-yl)cyclohex-1-en-1-yl)vinyl)-1,3,2-dioxaborolane (2w)**

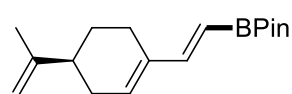

**2w**

Eluent: petroleum ether/ethyl acetate (80:1). Colorless oil (69.7 mg, 51%).  $^1\text{H}$  NMR (400 MHz,  $\text{CDCl}_3$ )  $\delta$  7.04 (d,  $J$  = 18.3 Hz, 1H), 6.01 – 5.95 (m, 1H), 5.43 (d,  $J$  = 18.3 Hz, 1H), 4.76 – 4.68 (m, 2H), 2.40 – 2.22 (m, 2H), 2.22 – 2.01 (m, 3H), 1.74 (s, 3H), 1.66 – 1.55 (m, 2H), 1.28 (s, 12H).  $^{13}\text{C}$  NMR (101 MHz,  $\text{CDCl}_3$ )  $\delta$  152.6, 149.5, 136.8, 133.5, 108.8, 83.1, 41.0, 31.5, 27.3, 24.8, 24.1, 20.8. The spectra data was consistent with literature report.<sup>S13</sup> HRMS  $m/z$  (ESI) calcd for  $\text{C}_{17}\text{H}_{28}\text{BO}_2$  ( $\text{M} + \text{H}$ )<sup>+</sup> 275.2177, found 275.2174.

**2-((*E*)-2-((1*R*,5*S*)-6,6-dimethylbicyclo[3.1.1]hept-2-en-2-yl)vinyl)-4,4,5,5-tetramethyl-1,3,2-dioxaborolane (2x)**

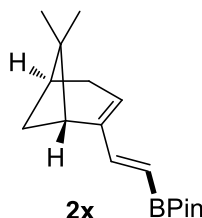

**2x**

Eluent: petroleum ether/ethyl acetate (80:1). Colorless oil (57.6 mg, 42%).  $^1\text{H}$  NMR (400 MHz,  $\text{CDCl}_3$ )  $\delta$  7.04 (d,  $J$  = 18.2 Hz, 1H), 5.82 – 5.75 (m, 1H), 5.41 (d,  $J$  = 18.2 Hz, 1H), 2.63 (td,  $J$  = 5.7, 1.5 Hz, 1H), 2.46 – 2.27 (m, 3H), 2.15 – 2.07 (m, 1H), 1.30 (s, 3H), 1.27 (s, 12H), 1.09 (d,  $J$  = 8.8 Hz, 1H), 0.75 (s, 3H).  $^{13}\text{C}$  NMR (101 MHz,  $\text{CDCl}_3$ )  $\delta$  150.4, 147.9, 129.2, 83.0, 40.9, 40.2, 37.7, 32.2, 31.2, 26.3, 24.8, 24.7, 20.8. ATR-FTIR ( $\text{cm}^{-1}$ ): 1424, 1264, 892, 732, 701. HRMS  $m/z$  (ESI) calcd for  $\text{C}_{17}\text{H}_{28}\text{BO}_2$  ( $\text{M} + \text{H}$ )<sup>+</sup> 275.2177, found 275.2172.

## 4. Experimental Procedure for Gram-Scale Borylation of 1a

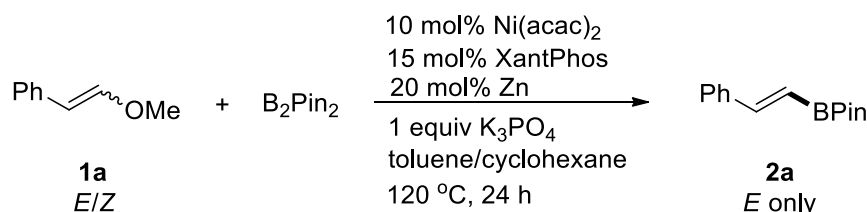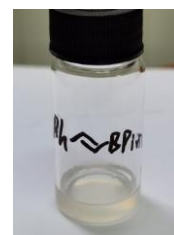

To a flame dried 100 mL Schlenk tube was added  $\text{Ni}(\text{acac})_2$  (0.6 mmol, 154.2 mg), XantPhos (0.9 mmol, 520.7 mg) and Zn (1.2 mmol, 78 mg), then  $\text{B}_2\text{Pin}_2$  (12 mmol, 3.048 g) and  $\text{K}_3\text{PO}_4$  (6 mmol, 1.272 g) were added. The tube was vacuumed and refilled with nitrogen three times followed by the addition of anhydrous toluene (15 mL) and cyclohexane (45 mL). Substrates **1a** (6 mmol, 804 mg) was also added with a syringe under nitrogen atmosphere and the plug is screwed. After that, The reaction was stirred under 120 °C in the heating module for 24 h. Then the mixture was cooled to room temperature, the solvents were removed under reduced pressure and the crude product was purified through flash chromatography with petroleum ether and ethyl acetate as the eluent to afford the pure product **2a** as a colorless oil in 80% yield (1.10g).

## 5. Experimental Procedure for the Synthesis of Piceatannol (7)

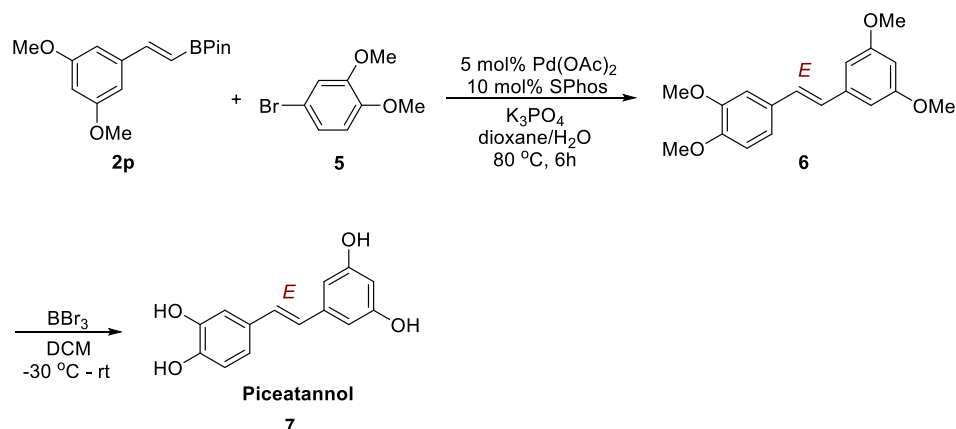

To a flame dried 25 mL Schlenk tube was added **2p** (0.3 mmol, 87.1 mg), Pd(OAc)<sub>2</sub> (0.015 mmol, 3.4 mg), SPhos (0.03 mmol, 12.3 mg) and K<sub>3</sub>PO<sub>4</sub> (0.9 mmol, 190.8 mg). The tube was vacuumed and refilled with nitrogen three times followed by the addition of 1,4-dioxane (3.0 mL) and H<sub>2</sub>O (30 μL). Aryl bromide **5** (0.36 mmol, 78.1 mg) was also added with a syringe under nitrogen atmosphere and the plug was screwed. After that, the reaction was stirred under 80 °C in the heating module for 6 h. Then the mixture was cooled to room temperature, the solvents were removed under reduced pressure and the crude product was purified by flash chromatography with petroleum ether and ethyl acetate as the eluent to afford the pure product **6** (white solid, 75.4 mg, 84%). <sup>1</sup>H NMR (400 MHz, CDCl<sub>3</sub>) δ 7.10 – 6.98 (m, 3H), 6.95 – 6.80 (m, 2H), 6.66 (d, *J* = 2.3 Hz, 2H), 6.39 (t, *J* = 2.3 Hz, 1H), 3.94 (s, 3H), 3.90 (s, 3H), 3.83 (s, 6H). <sup>13</sup>C NMR (101 MHz, CDCl<sub>3</sub>) δ 160.9, 149.0, 148.9, 139.5, 130.1, 128.9, 126.7, 119.9, 111.1, 108.7, 104.2, 99.6, 55.8, 55.8, 55.3. The spectra data was consistent with literature report.<sup>S14</sup>

To the above compound **6** (0.1 mmol, 30.0 mg) in 25 mL flame dried Schlenk tube was added anhydrous CH<sub>2</sub>Cl<sub>2</sub> (1.0 mL). The solution was stirred under -30°C and BBr<sub>3</sub> (1.0 M in DCM, 1.0 mmol, 1mL) was added dropwise to the mixture. Then the reaction was slowly warmed to room temperature and stirred for another 4 h. When the reaction was finished, 5 mL of water was added and stirred for another 5 min. The aqueous phase was extracted by DCM and the combined organic phase was dried over anhydrous sodium sulfate. The mixture was then filtered and the solvent was removed under reduced pressure. Further purification by flash chromatography would afford the complete *E*-isomer of Piceatannol (**7**) as a light brown solid (26.9 mg) in 90% yield. <sup>1</sup>H NMR (400 MHz, CD<sub>3</sub>OD) δ 6.97 (d, *J* = 2.0 Hz, 1H), 6.89 (d, *J* = 16.3 Hz, 1H), 6.83 (dd, *J* = 8.2, 2.1 Hz, 1H), 6.78 – 6.70 (m, 2H), 6.44 (d, *J* = 2.2 Hz, 2H), 6.16 (t, *J* = 2.1 Hz, 1H). <sup>13</sup>C NMR (101 MHz, CD<sub>3</sub>OD) δ 159.6, 146.5, 146.5, 141.3, 131.1,



129.7, 127.0, 120.2, 116.4, 113.8, 105.8, 102.6. The spectra data was consistent with literature report.<sup>S15</sup>

HRMS m/z (ESI) calcd for C<sub>14</sub>H<sub>12</sub>NaO<sub>4</sub> (M + Na)<sup>+</sup> 267.0628, found 267.0624.

## 6. References

- (S1) Hostier, T.; Neouchy, Z.; Ferey, V.; Pardo, D. G.; Cossy, J. *Org. Lett.* **2018**, *20*, 1815.
- (S2) Al-Smadi, D.; Enugala, T. R.; Norberg, T.; Kihlberg, J.; Widersten, M. *Synlett* **2018**, *29*, 1187.
- (S3) Gemma, S.; Kunjir, S. and et. al. *J. Med. Chem.* **2011**, *54*, 5949.
- (S4) Shigeno, M.; Nakamura, R.; Hayashi, K.; Nozawa-Kumada, K.; Kondo, Y. *Org. Lett.* **2019**, *21*, 6695.
- (S5) Gualandi, A.; Canestrari, P.; Emer, E.; Cozzi, P. G. *Adv. Synth. Catal.* **2014**, *356*, 528.
- (S6) Su, Y.-L.; Li, L.-L.; Zhou, X.-L.; Dai, Z.-Y.; Wang, P.-S.; Gong, L.-Z. *Org. Lett.* **2018**, *20*, 2403.
- (S7) Shi, X.; Li, S.; Wu, L. *Angew. Chem. Int. Ed.* **2019**, *58*, 16167.
- (S8) Yoshii, D.; Jin, X.; Mizuno, N.; Yamaguchi, K. *ACS Catal.* **2019**, *9*, 3011.
- (S9) Wen, H.; Zhang, L.; Zhu, S.; Liu, G.; Huang, Z. *ACS Catal.* **2017**, *7*, 6419.
- (S10) Molloy, J. J.; Seath, C. P.; West, M. J.; McLaughlin, C.; Fazakerley, N. J.; Kennedy, A. R.; Nelson, D. J.; Watson, A. J. B. *J. Am. Chem. Soc.* **2018**, *140*, 126.
- (S11) Zhang, G.; Wu, J.; Zeng, H.; Neary, M. C.; Devany, M.; Zheng, S.; Dub, P. A. *ACS Catal.* **2019**, *9*, 874.
- (S12) Saito, H.; Otsuka, S.; Nogi, K.; Yorimitsu, H. *J. Am. Chem. Soc.* **2016**, *138*, 15315.
- (S13) Francois, B.; Eberlin, L.; Berrée, F.; Whiting, A.; Carboni, B. *J. Org. Chem.* **2020**, *85*, 5173.
- (S14) Chen, G.-G.; Wei, J.-Q.; Yang, X.-L.; Yao, Z.-J. *Org. Lett.* **2016**, *18*, 1502.
- (S15) Wan, X.; Wang, X.-B.; Yang, M.-H.; Wang, J.-S.; Kong, L.-Y. *Bioorg. Med. Chem.* **2011**, *19*, 5085.

## 7. Spectroscopic Data

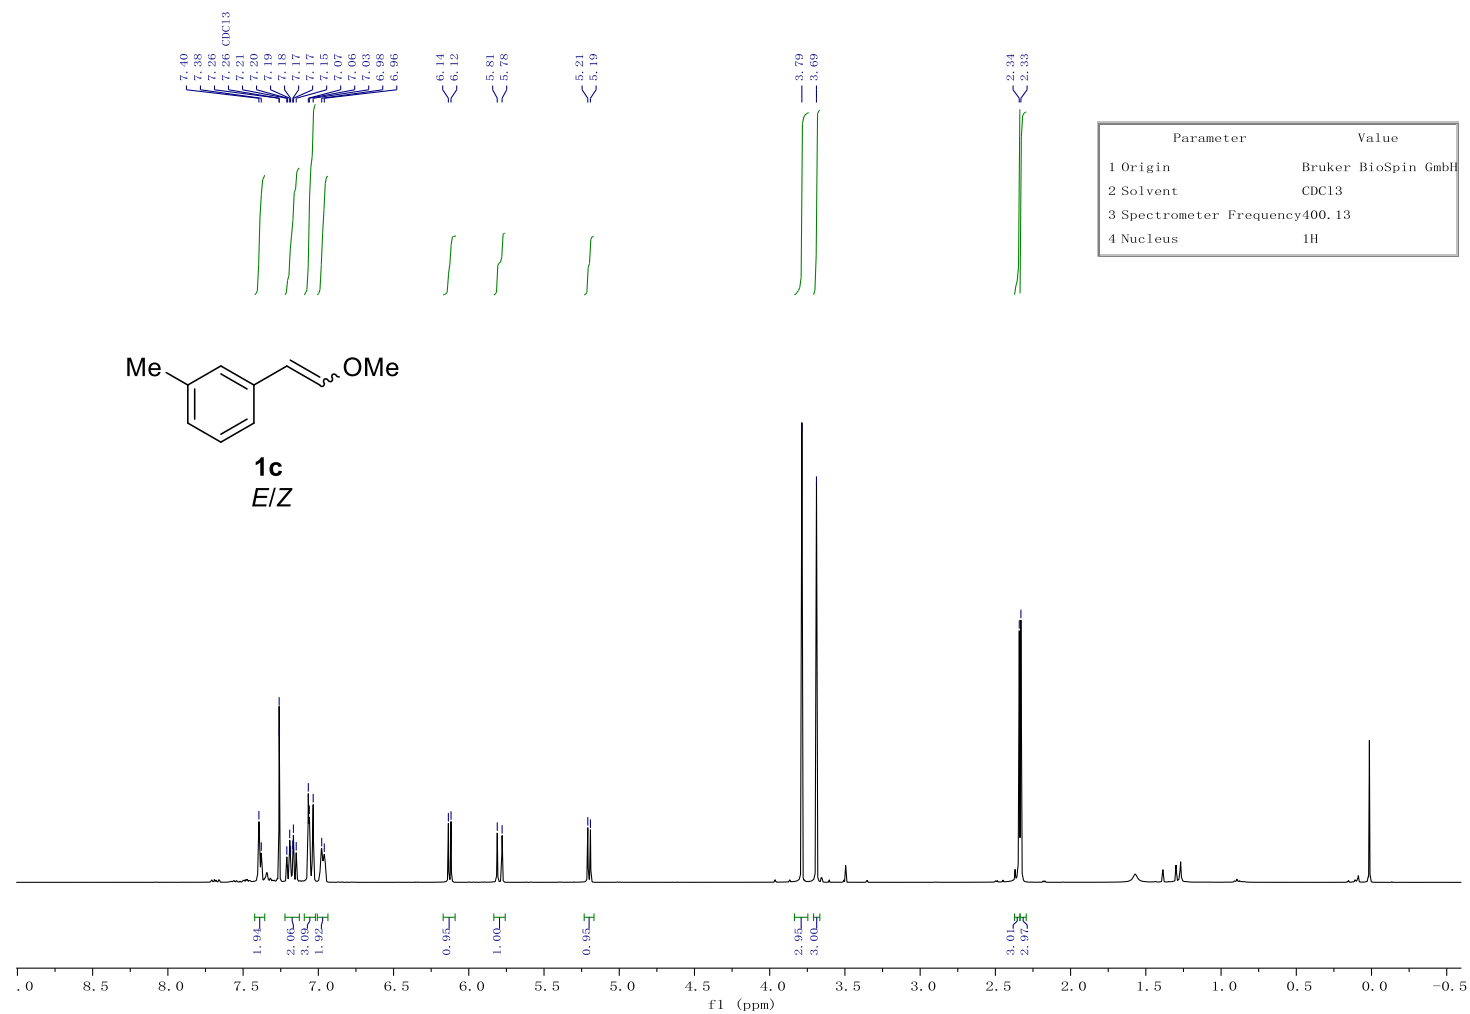

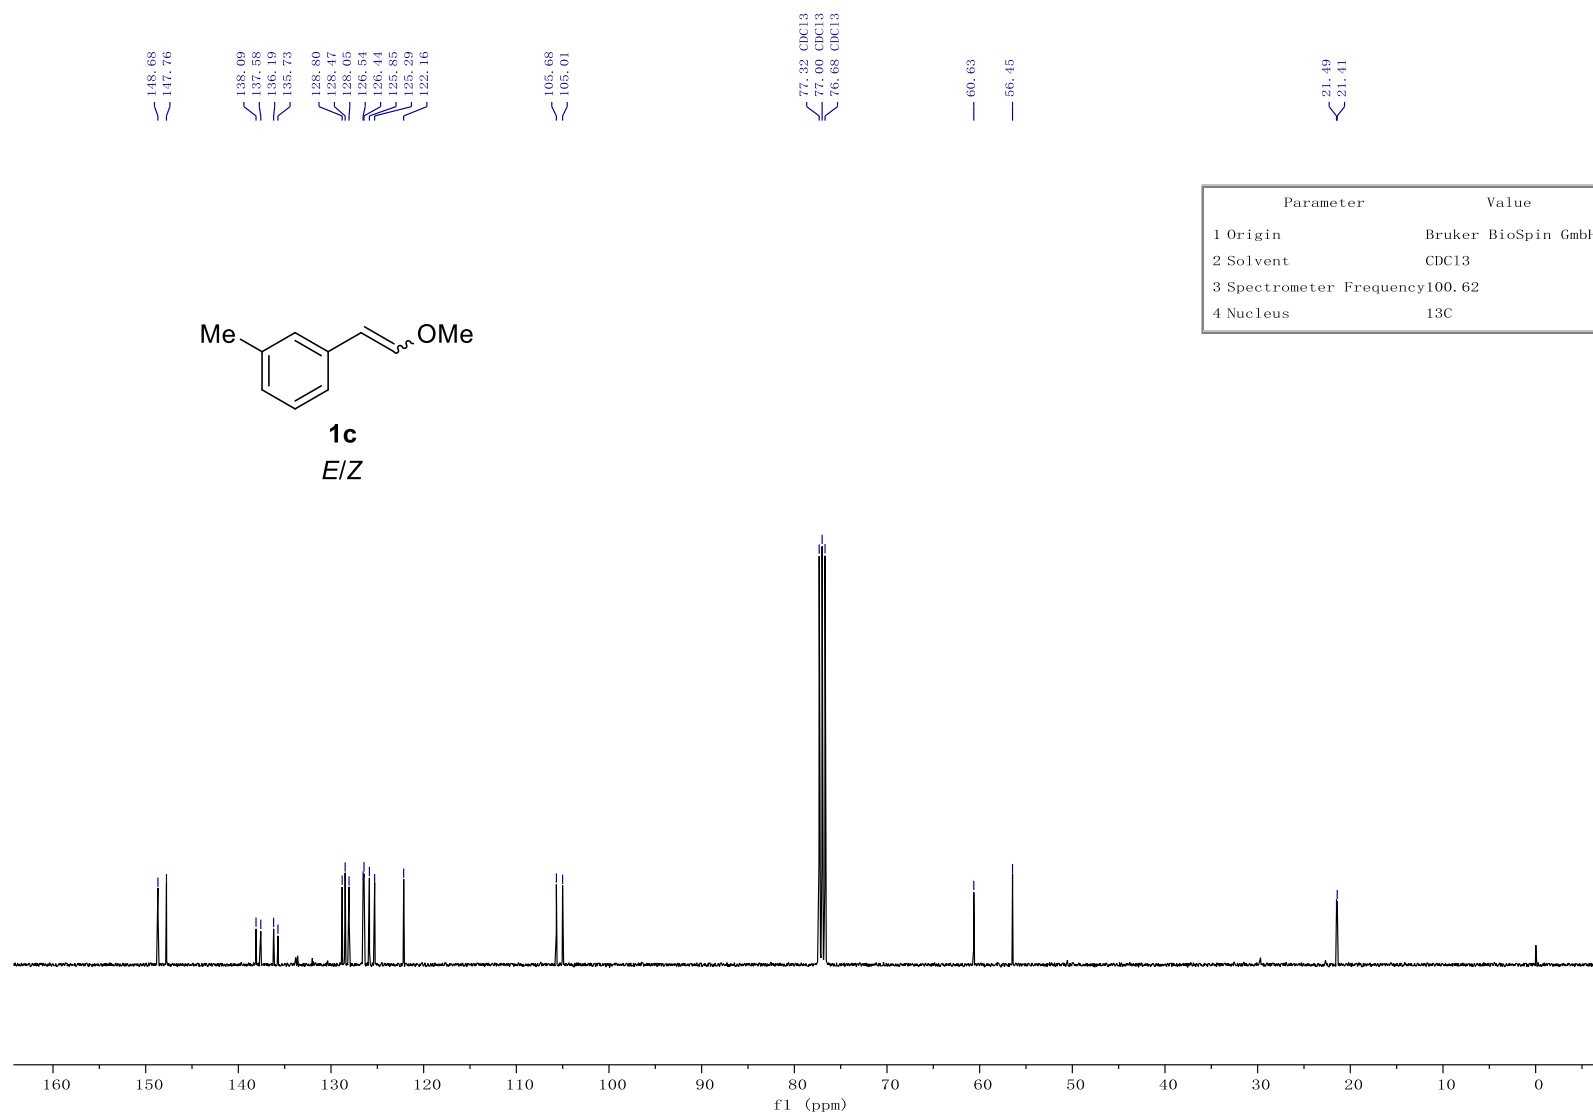

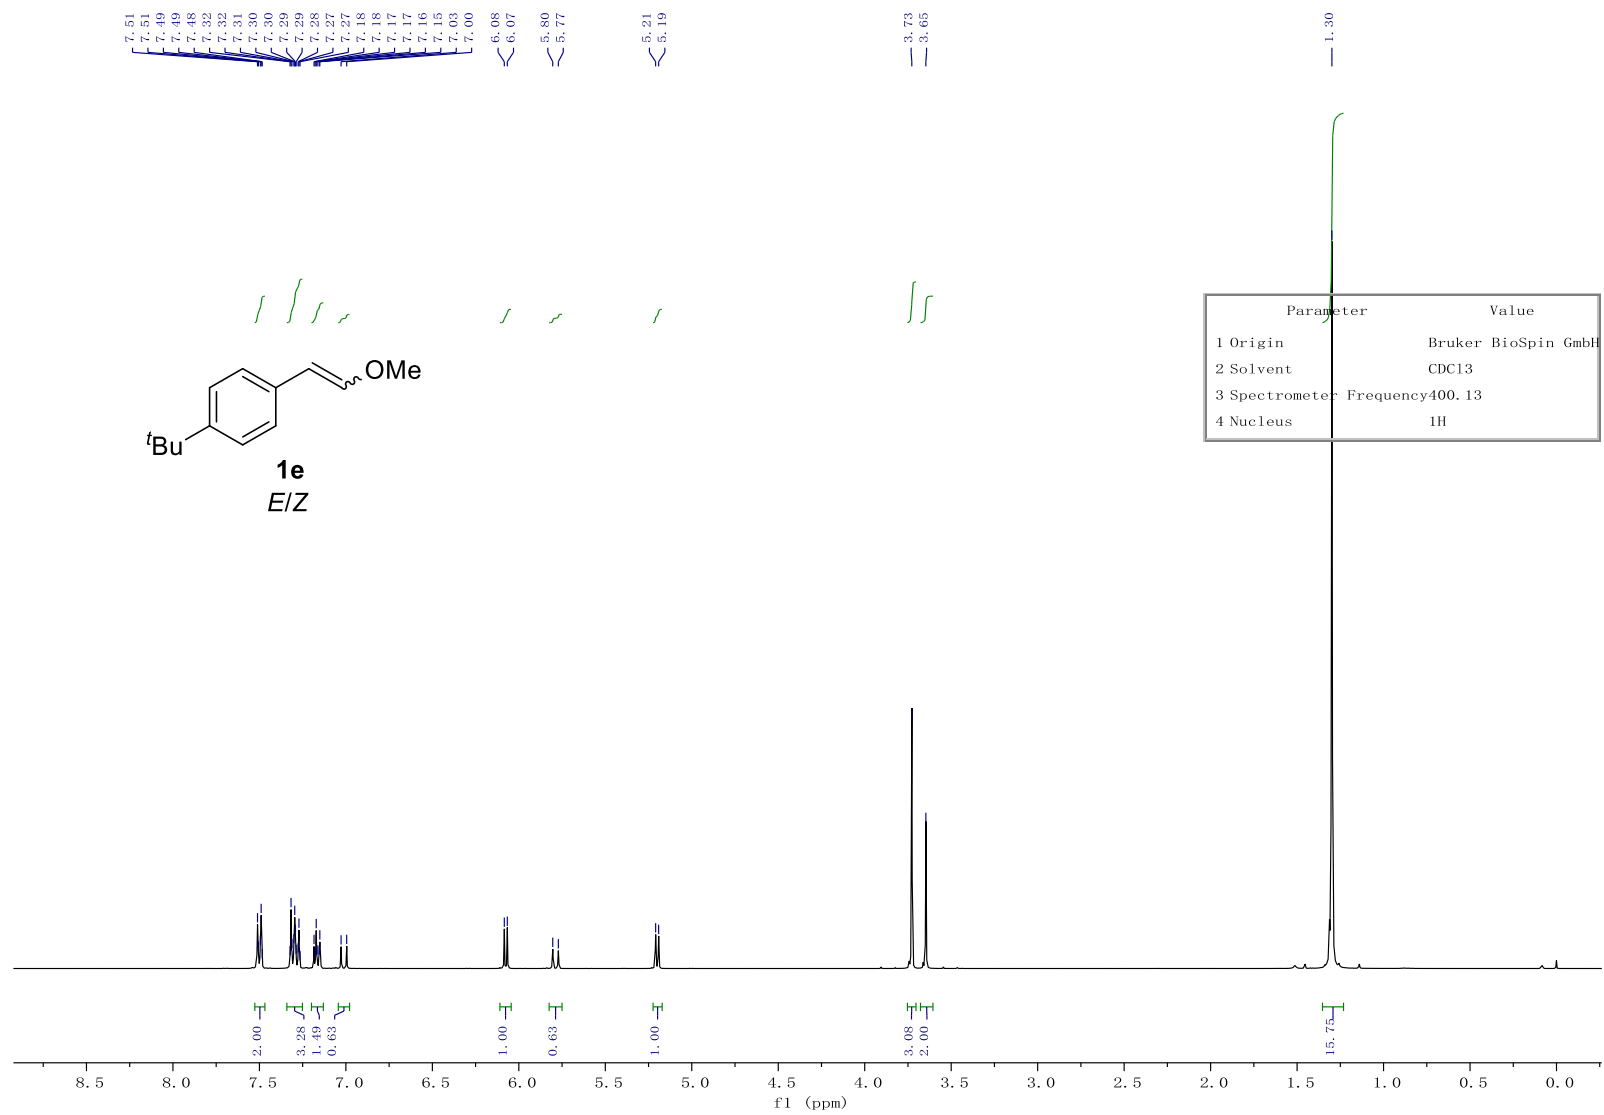

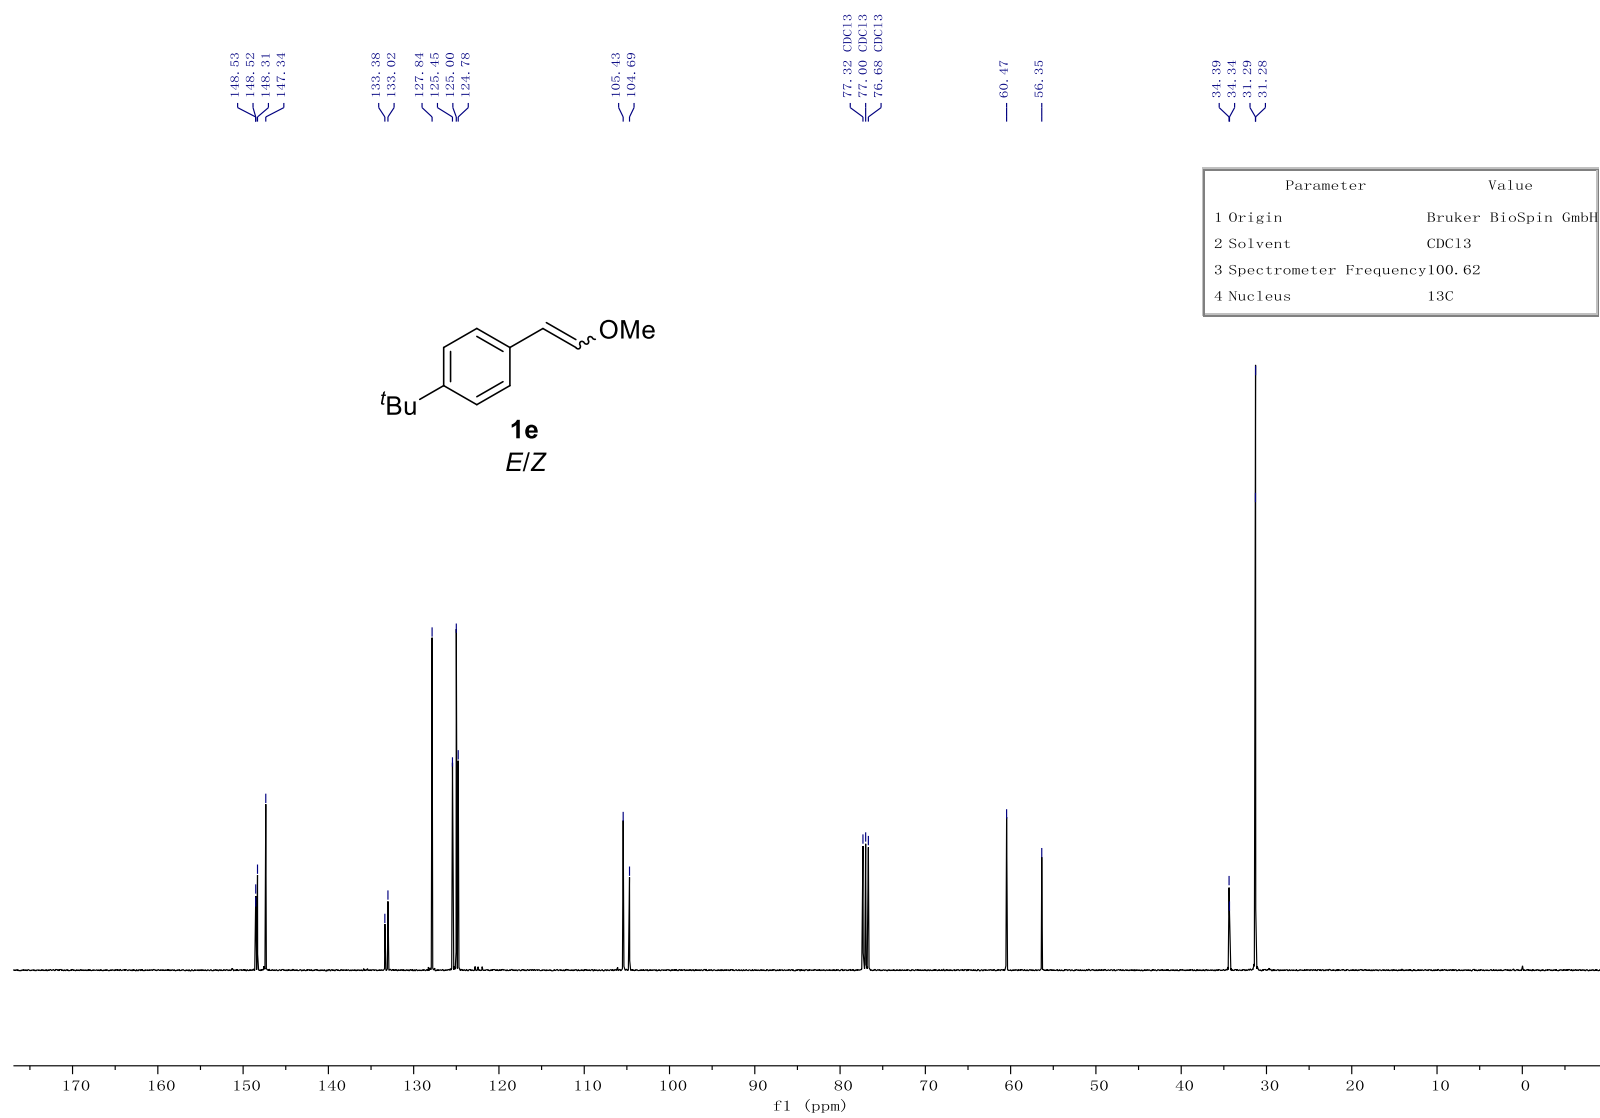

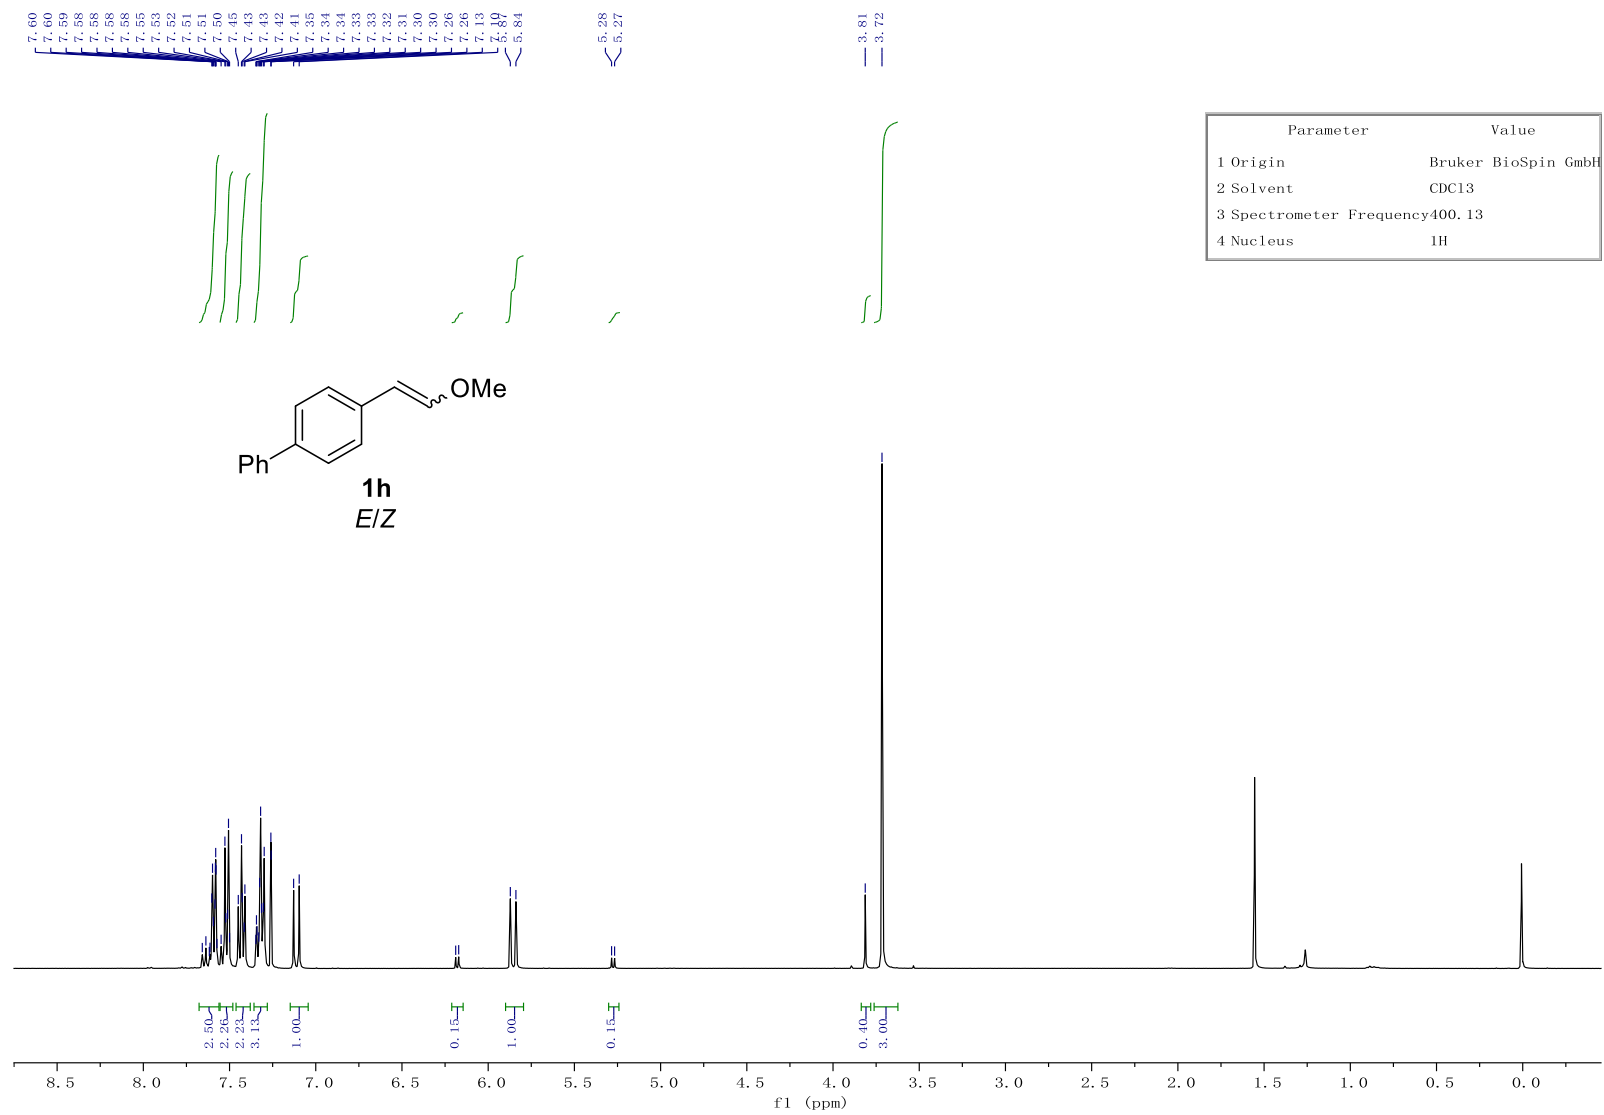

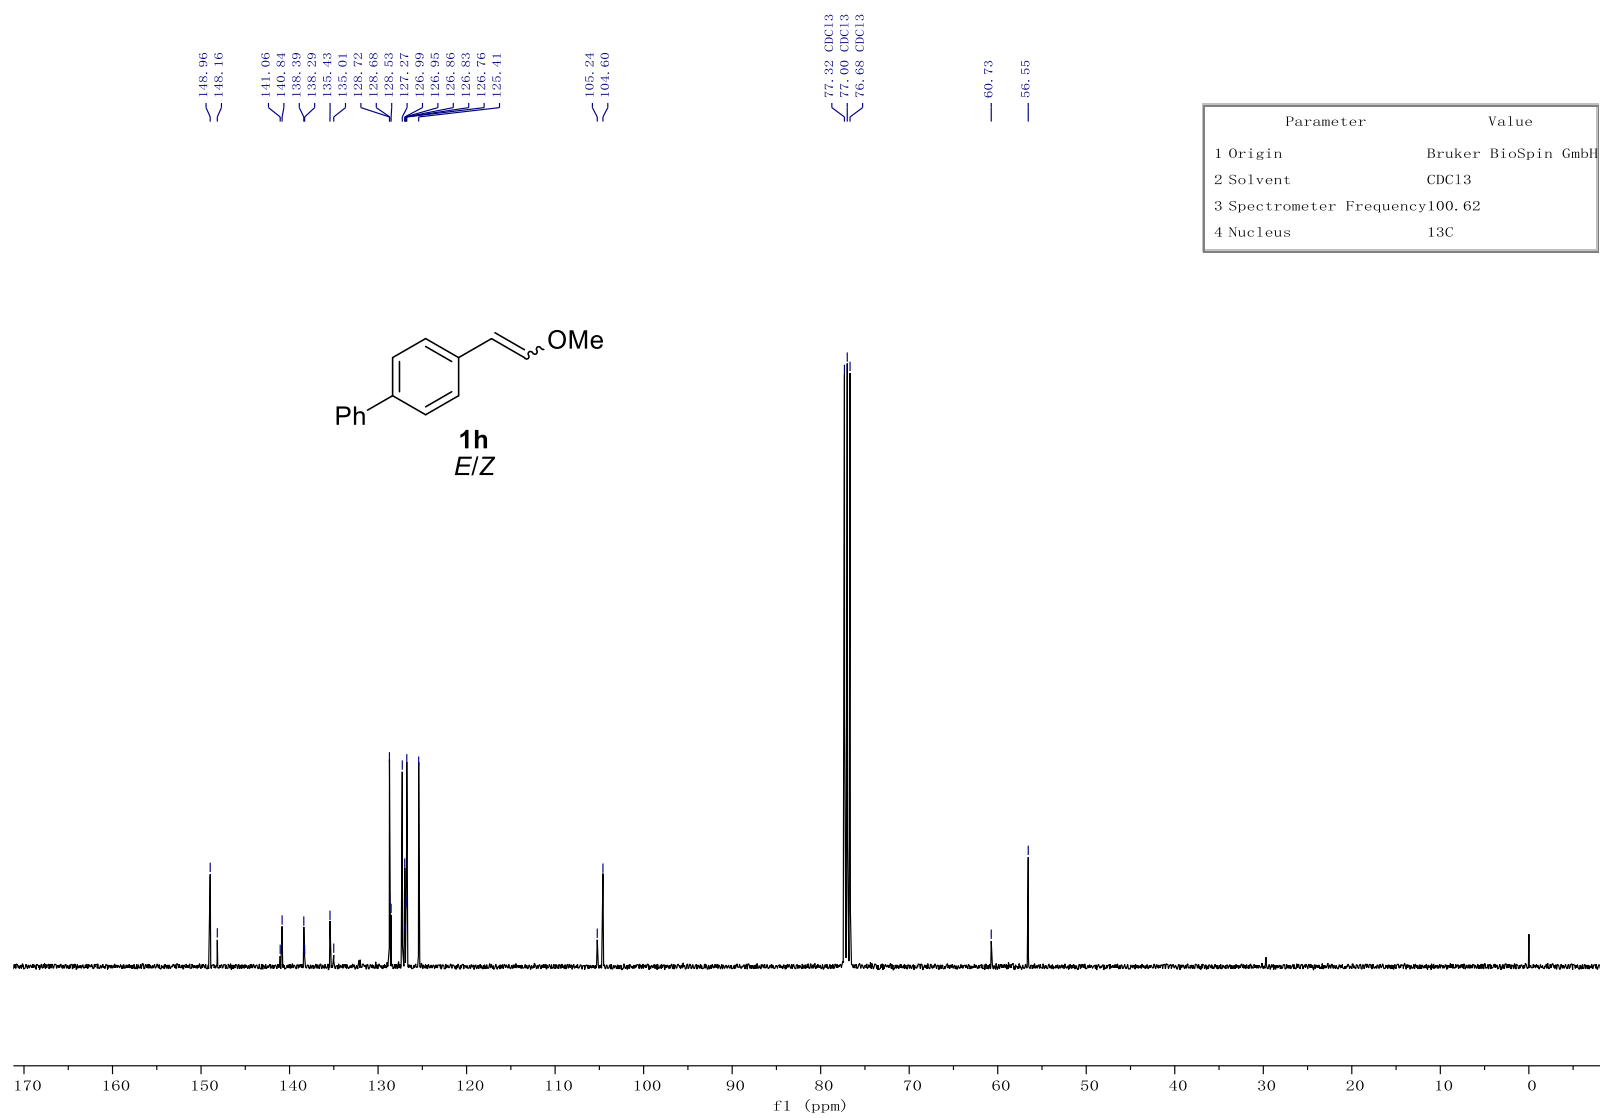

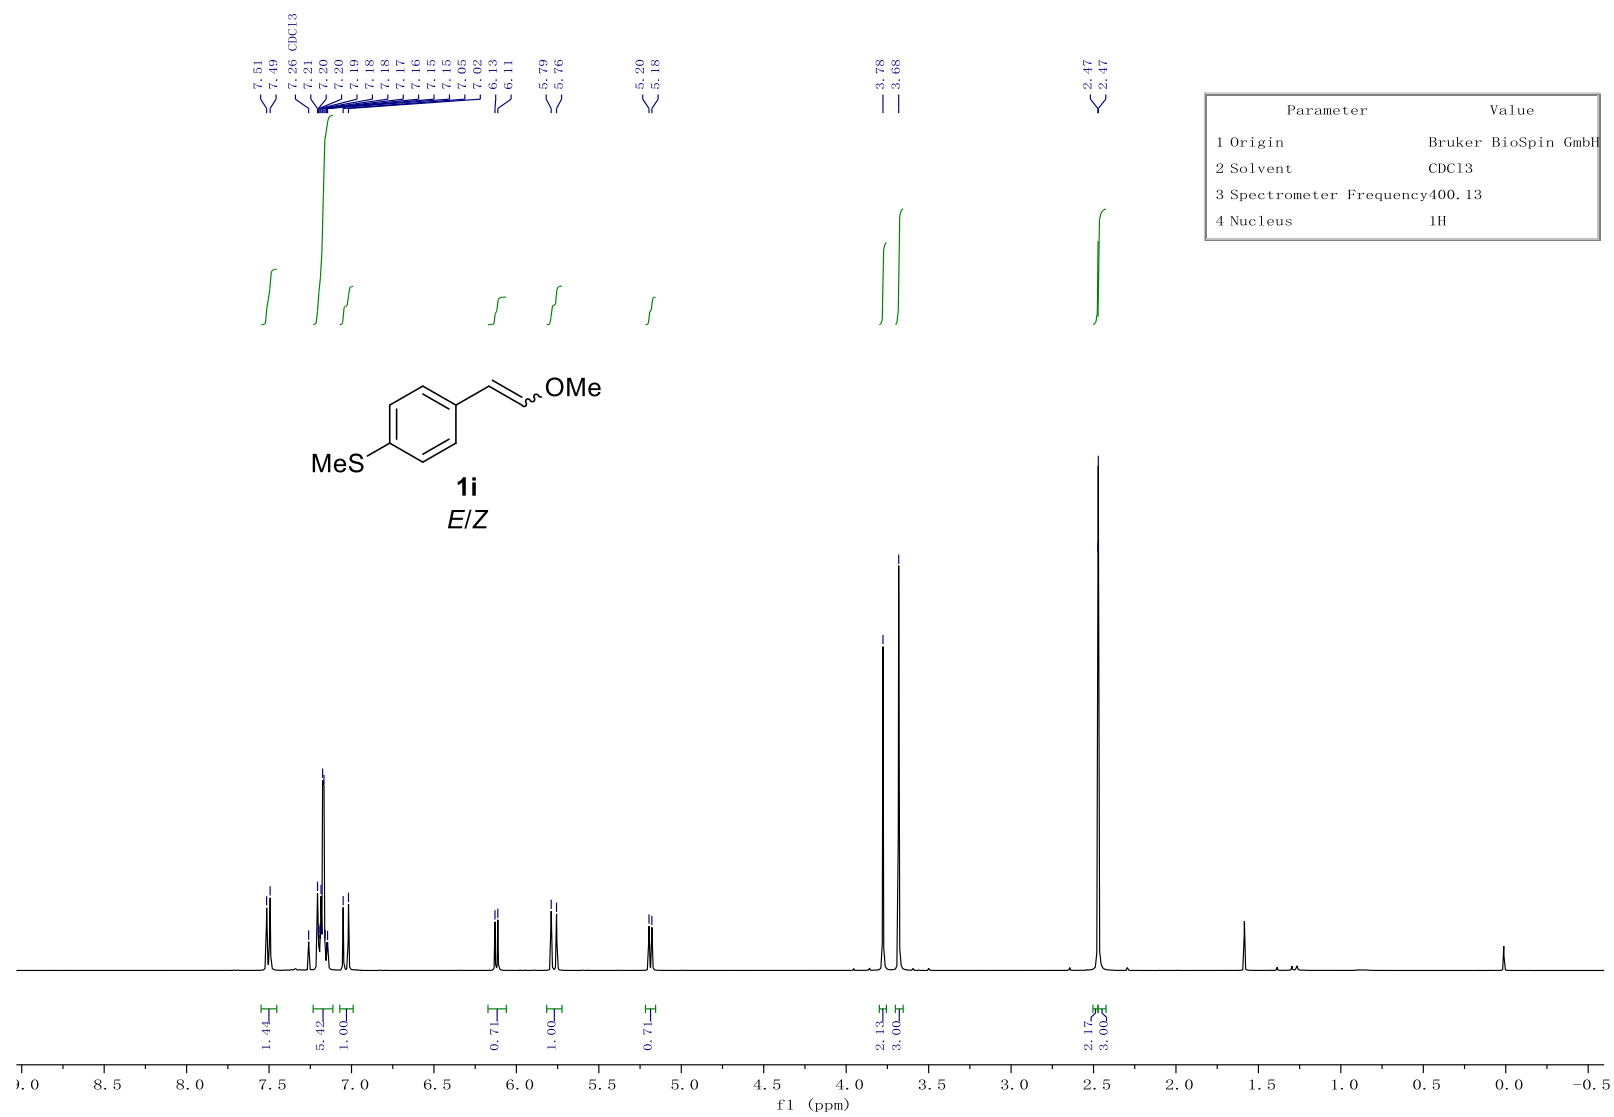



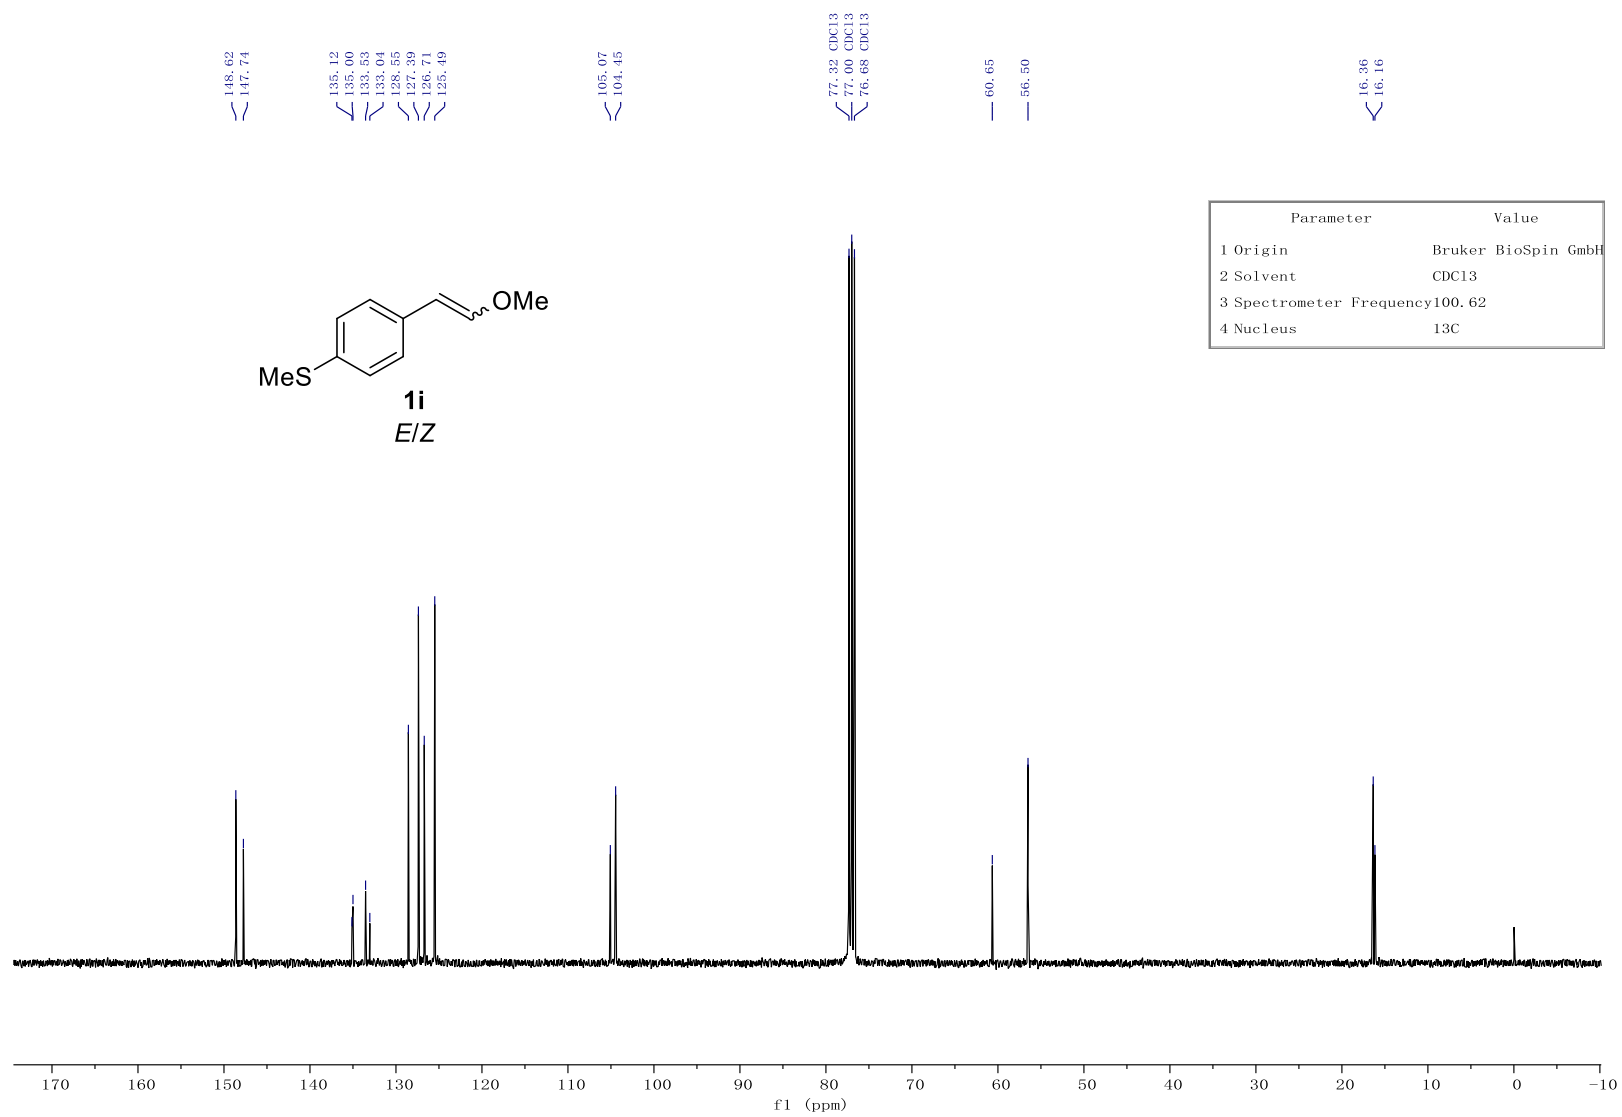

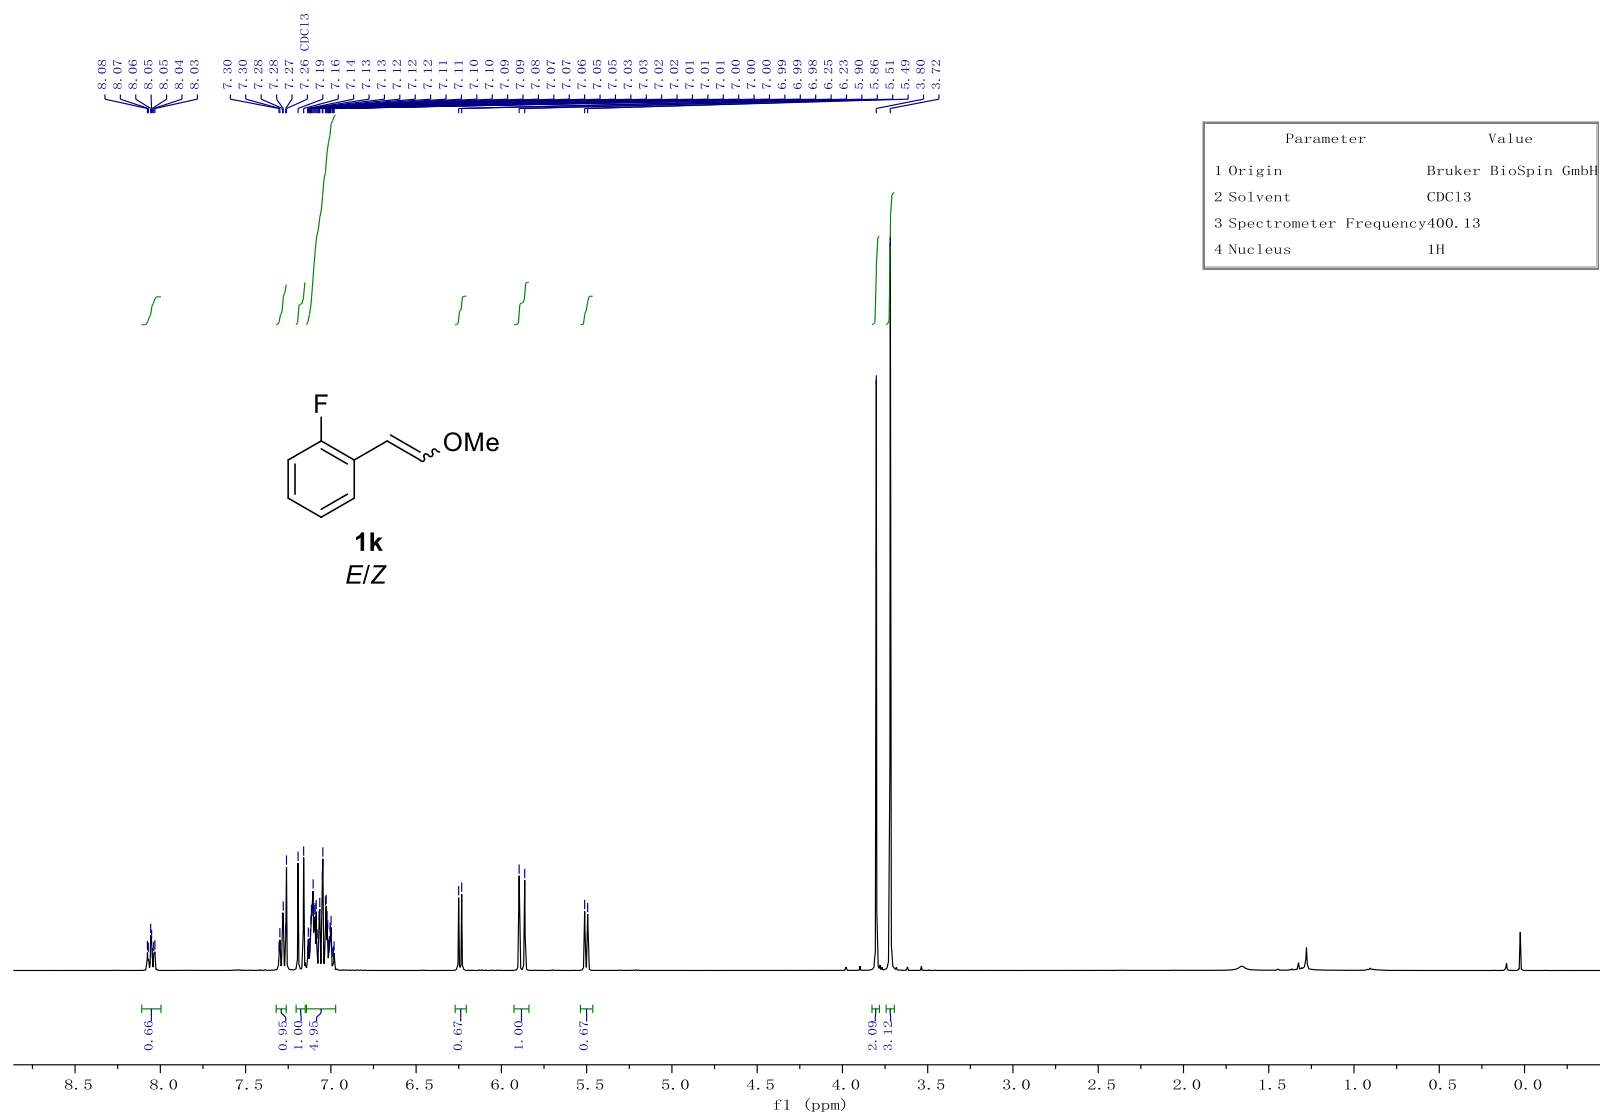

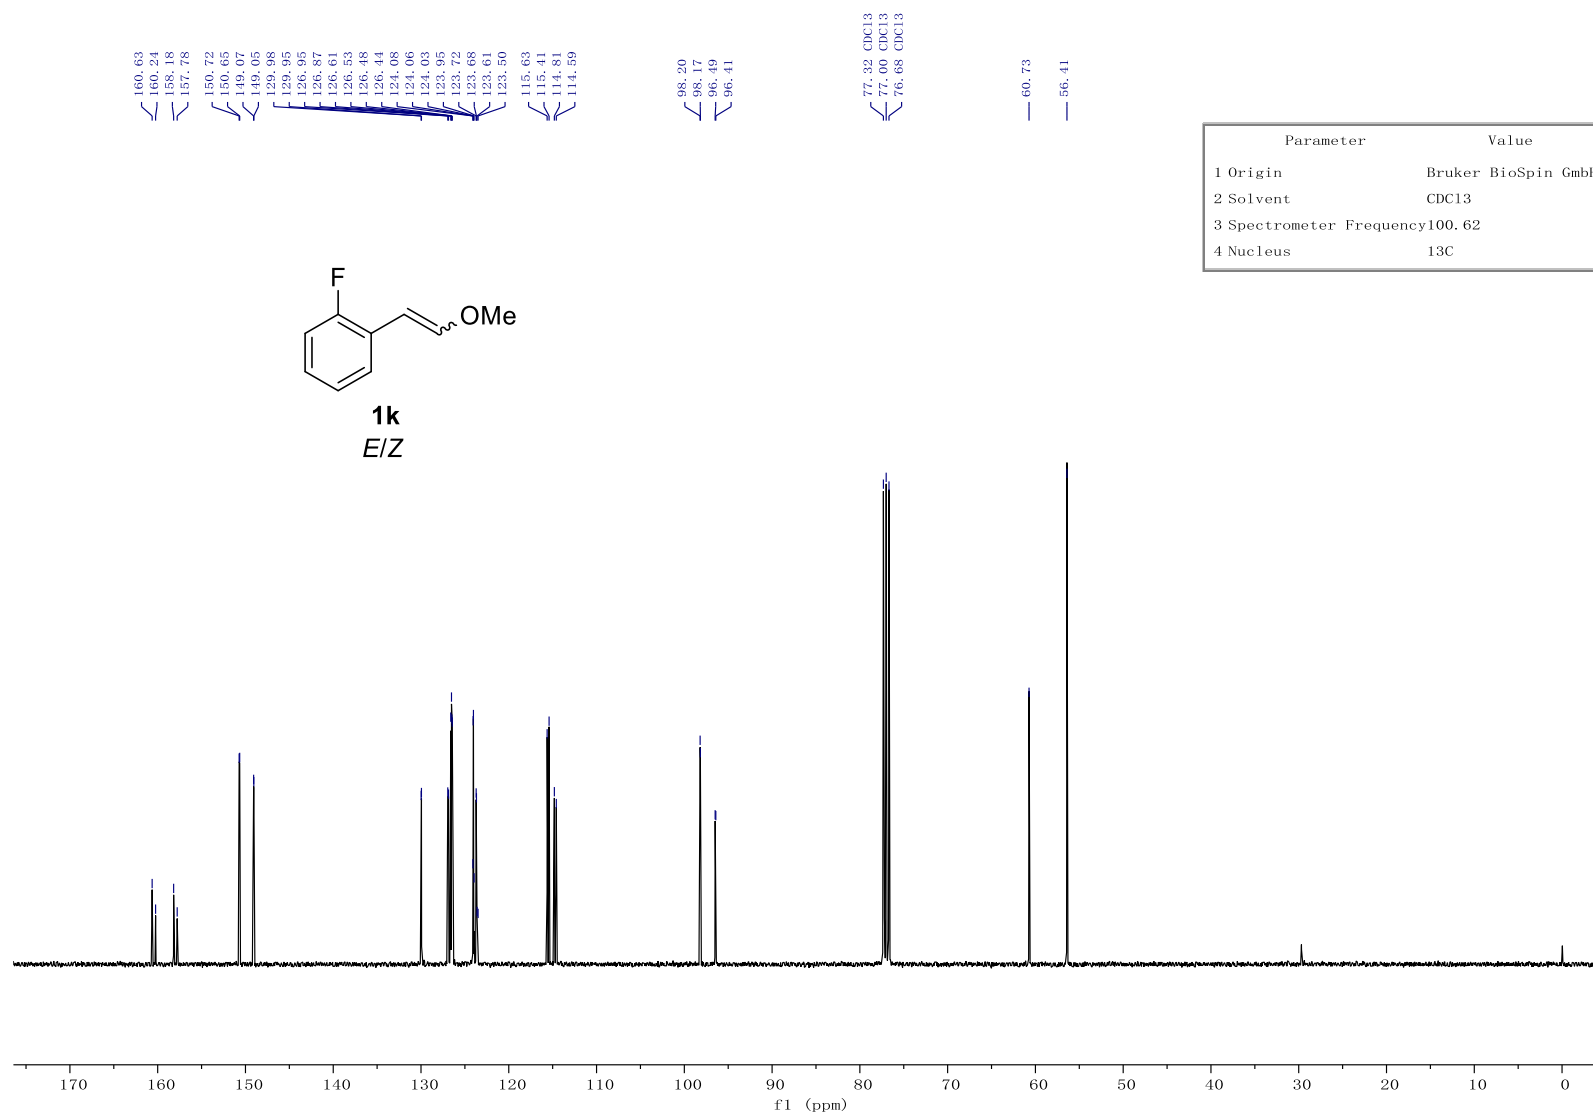

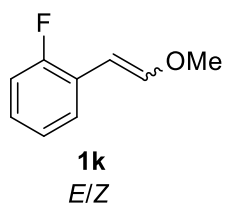

-117.52  
 -118.81

| Parameter                | Value               |
|--------------------------|---------------------|
| 1 Origin                 | Bruker BioSpin GmbH |
| 2 Solvent                | CDC13               |
| 3 Spectrometer Frequency | 376.46              |
| 4 Nucleus                | <sup>19</sup> F     |

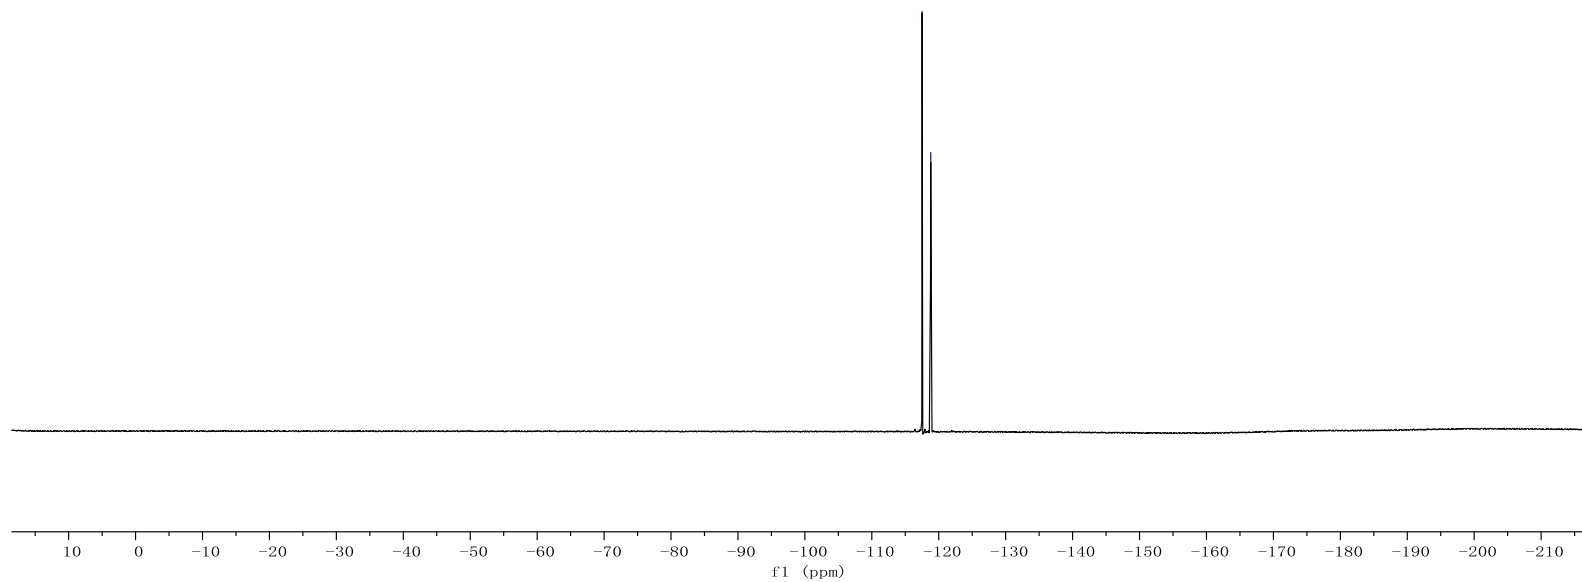

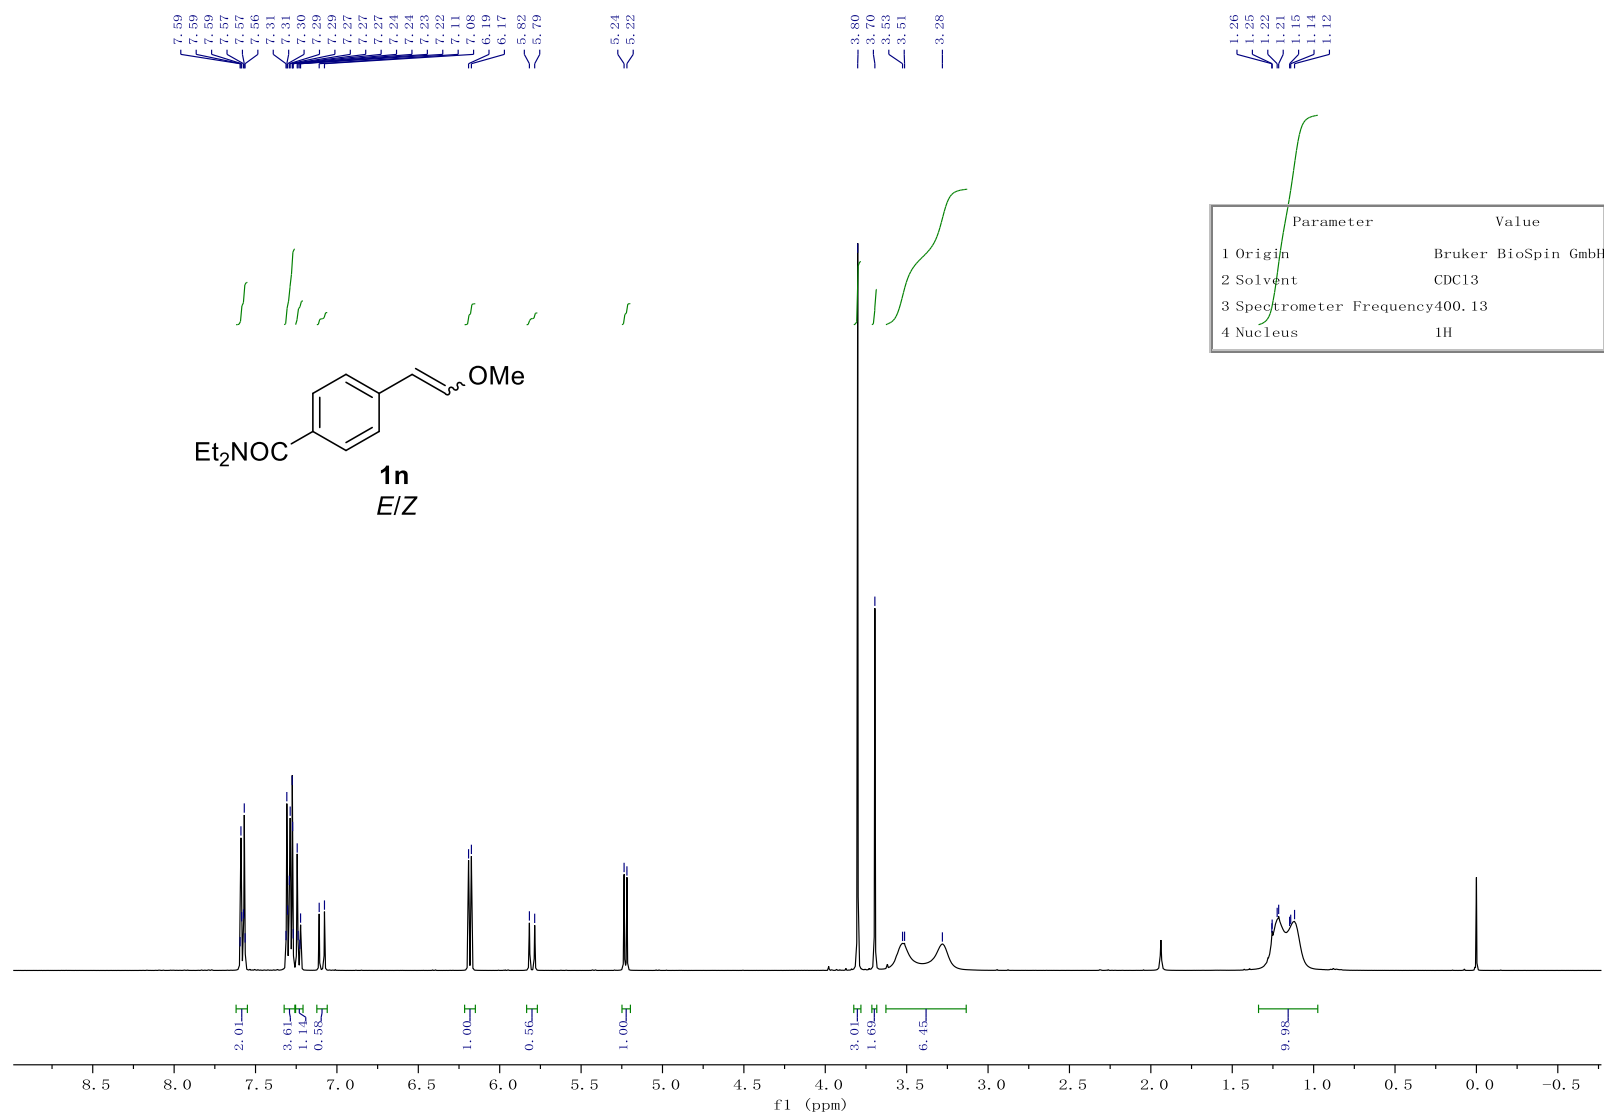

| Parameter                | Value               |
|--------------------------|---------------------|
| 1 Origin                 | Bruker BioSpin GmbH |
| 2 Solvent                | CDCl3               |
| 3 Spectrometer Frequency | 400.13              |
| 4 Nucleus                | 1H                  |

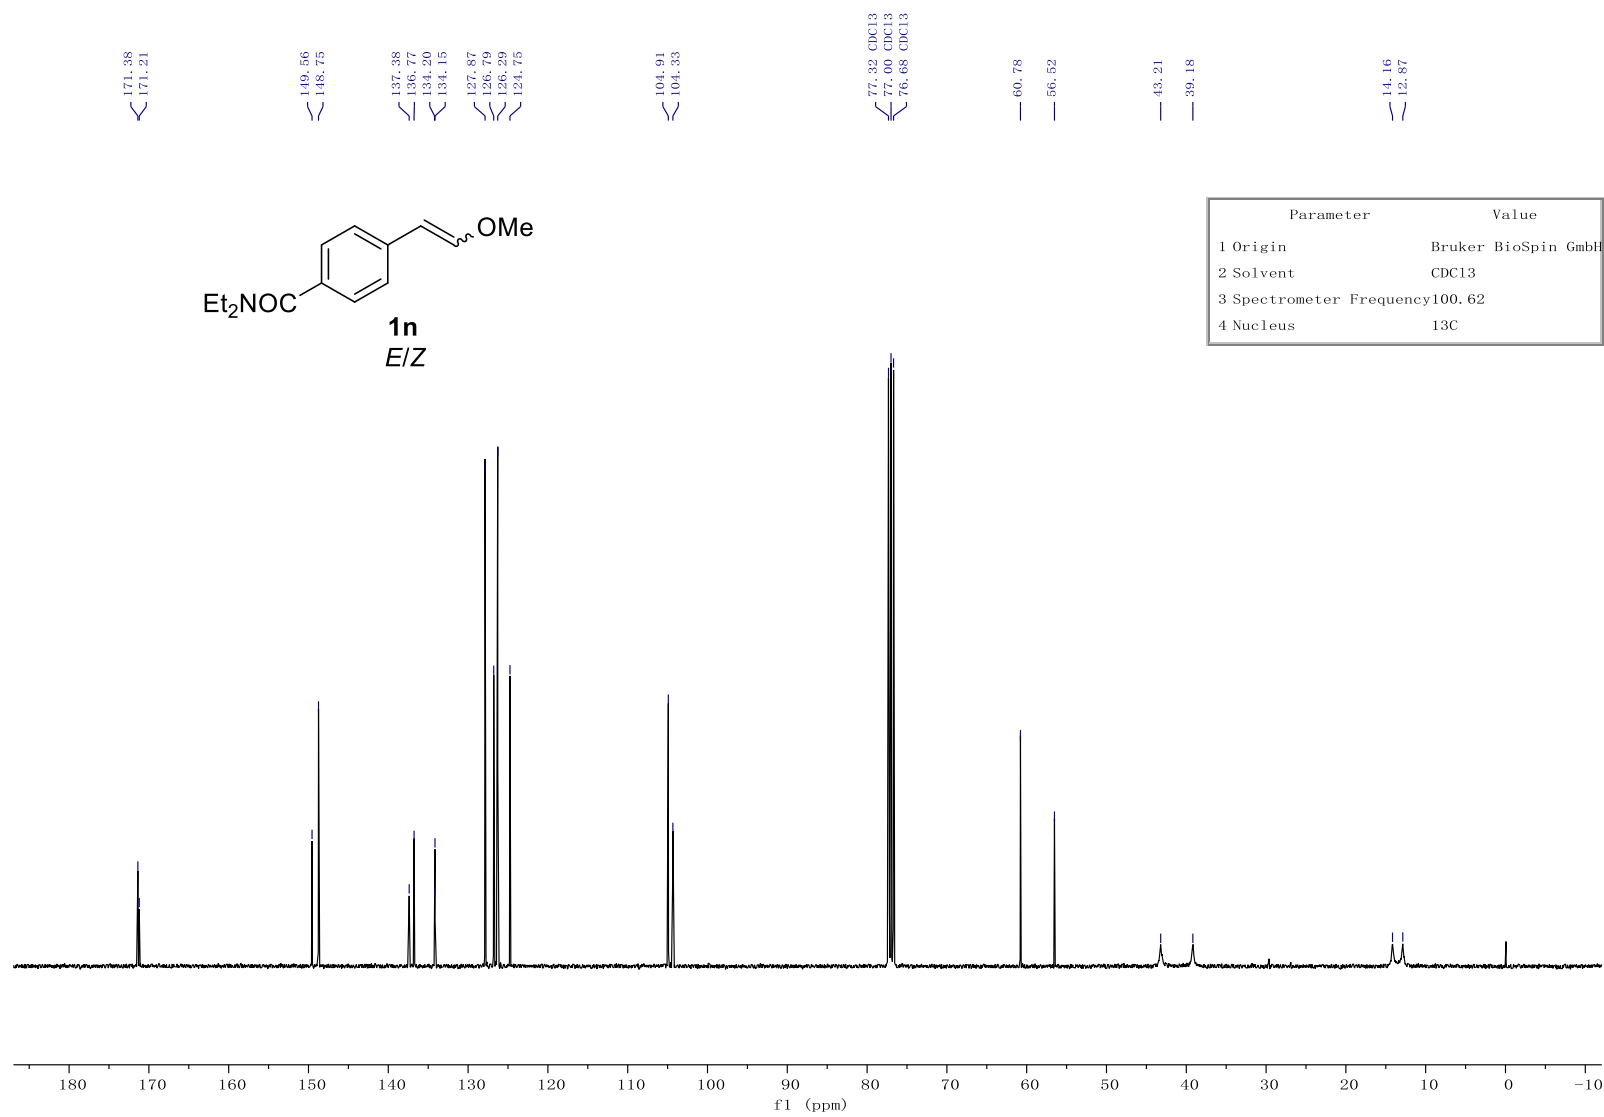

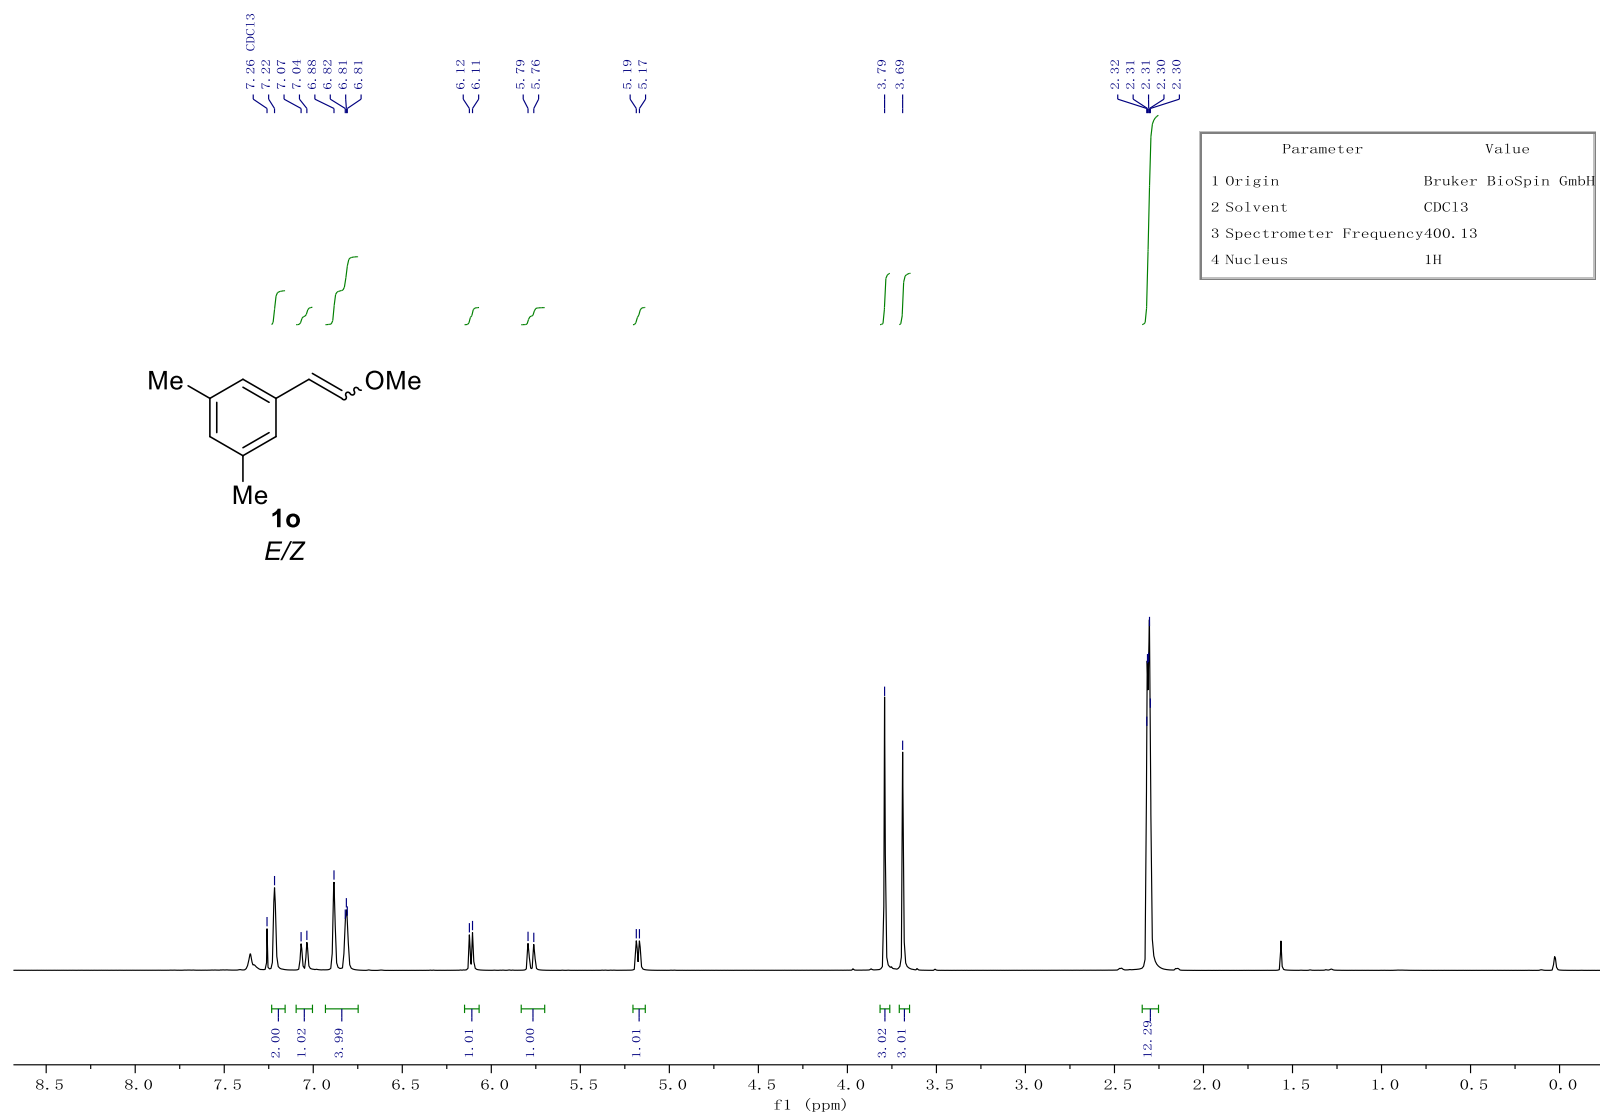

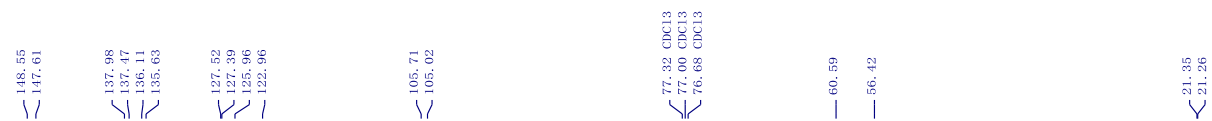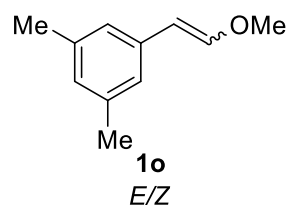

| Parameter                | Value               |
|--------------------------|---------------------|
| 1 Origin                 | Bruker BioSpin GmbH |
| 2 Solvent                | CDC13               |
| 3 Spectrometer Frequency | 100.62              |
| 4 Nucleus                | <sup>13</sup> C     |

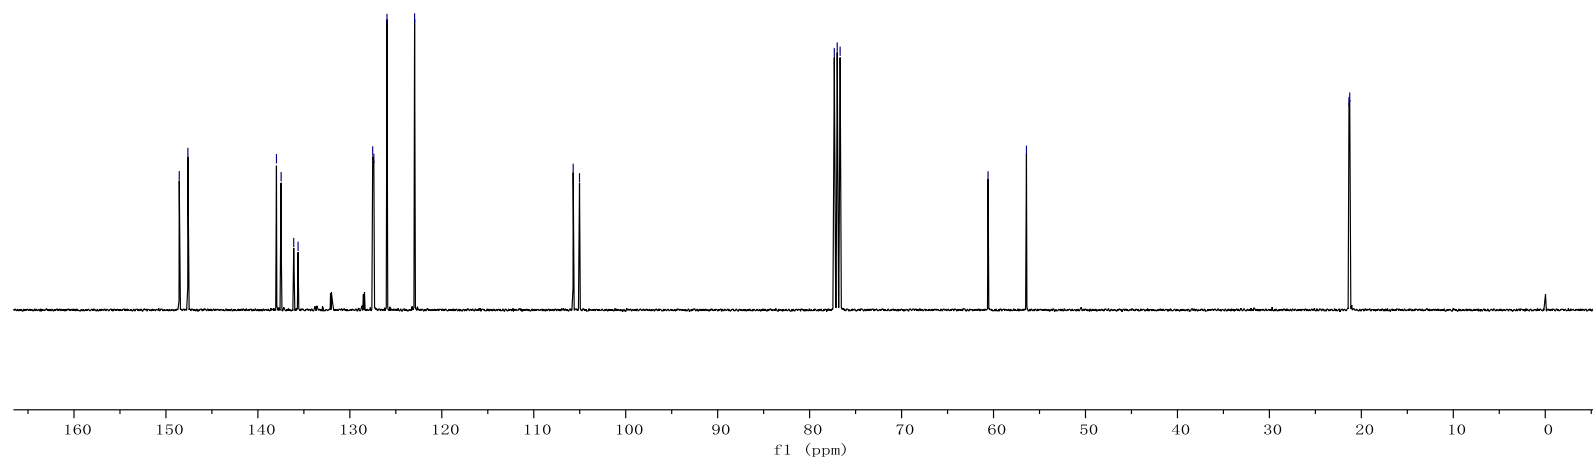



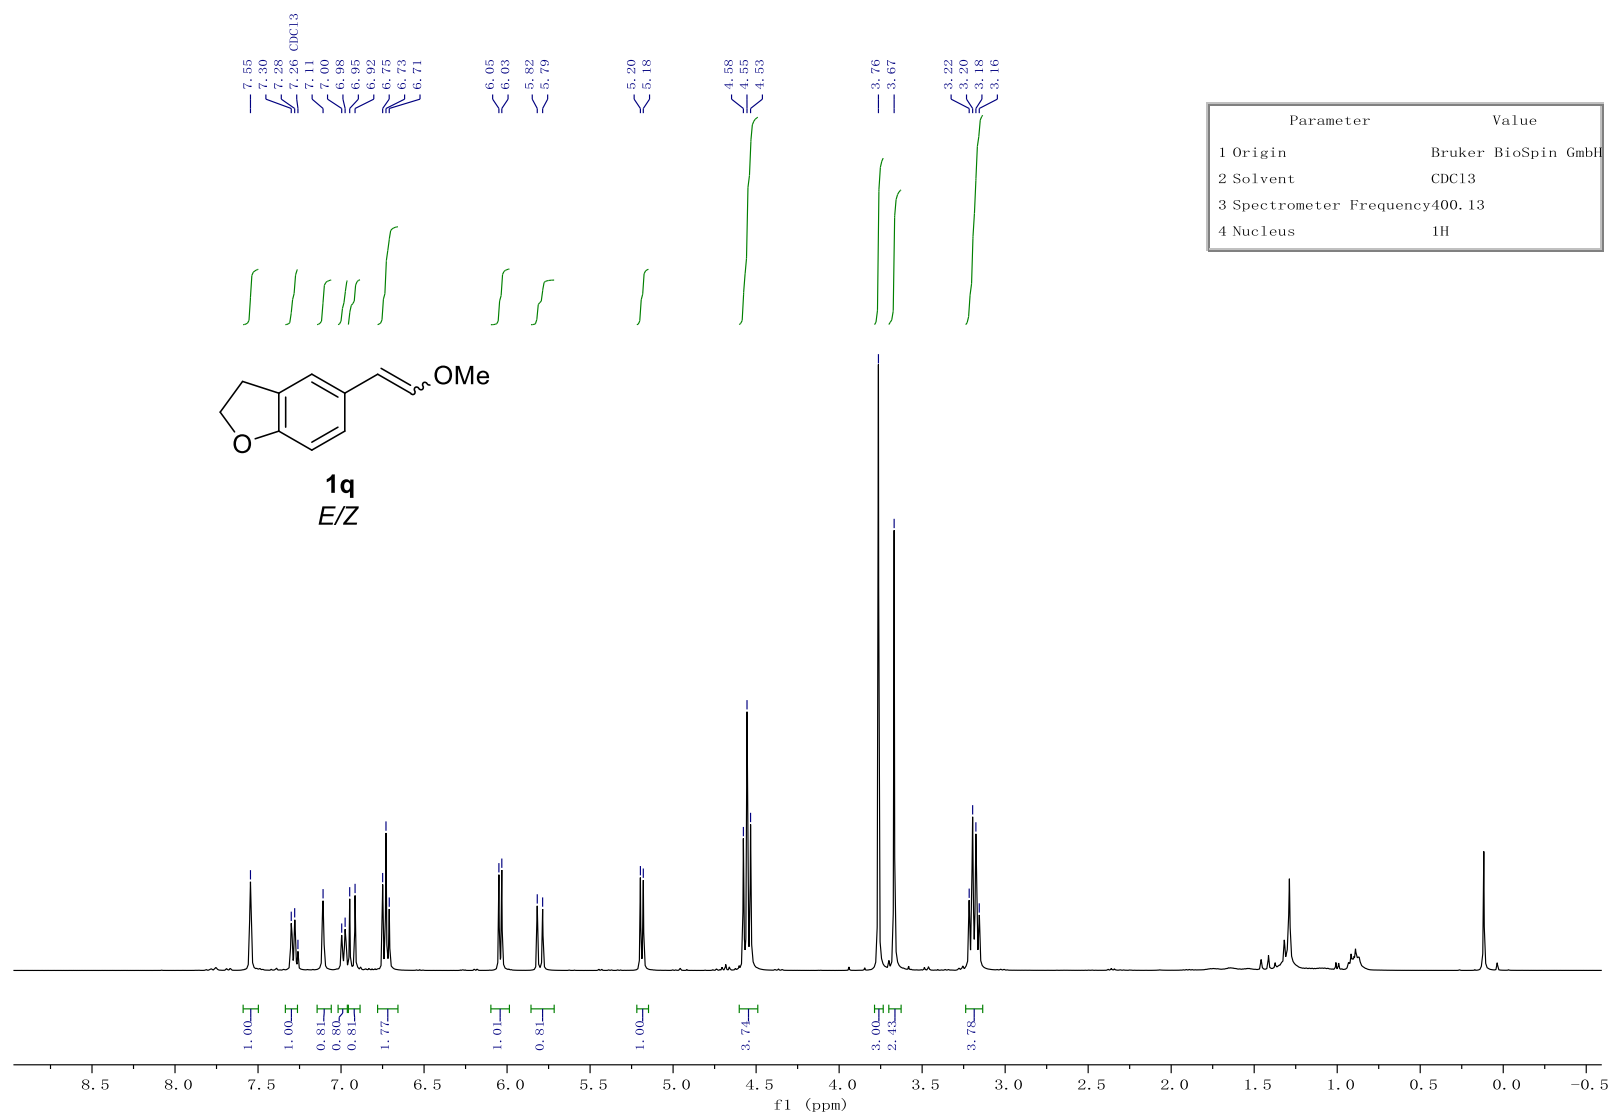

158.28  
158.00

147.00  
145.72

128.64  
128.54  
128.05  
127.30  
126.71  
125.00  
124.67  
121.34

109.13  
108.73  
105.51  
104.93

77.32 CDC13  
77.00 CDC13  
76.68 CDC13

71.10  
71.07

60.32  
56.31

29.65  
29.62

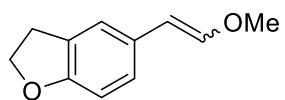

**1q**  
*E/Z*

| Parameter                | Value               |
|--------------------------|---------------------|
| 1 Origin                 | Bruker BioSpin GmbH |
| 2 Solvent                | CDC13               |
| 3 Spectrometer Frequency | 100.62              |
| 4 Nucleus                | <sup>13</sup> C     |

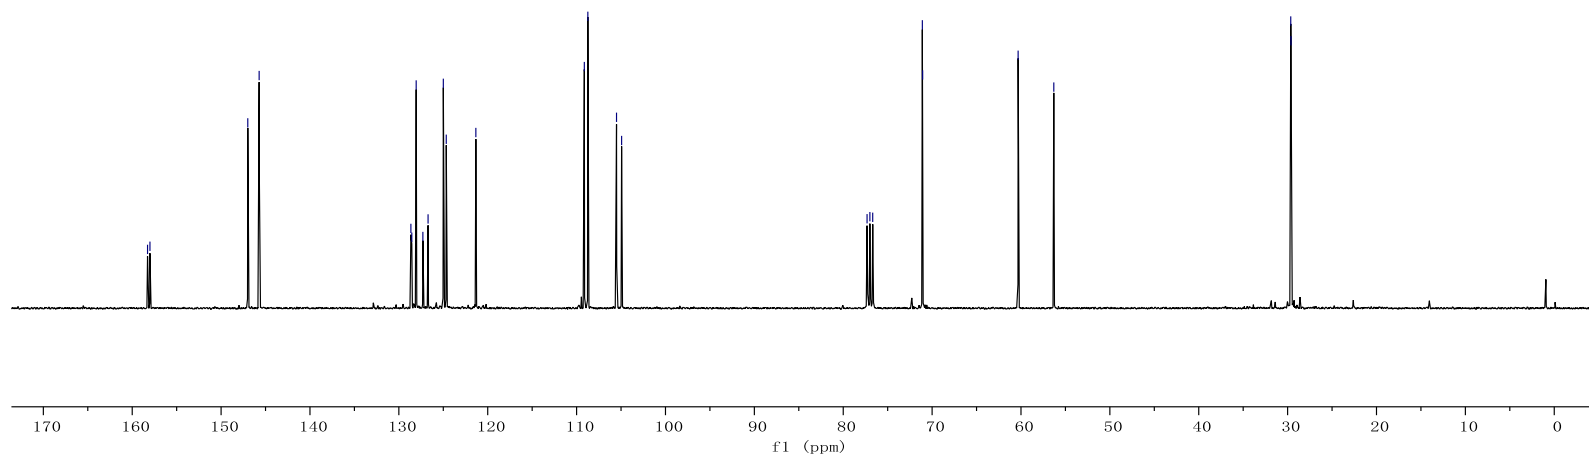

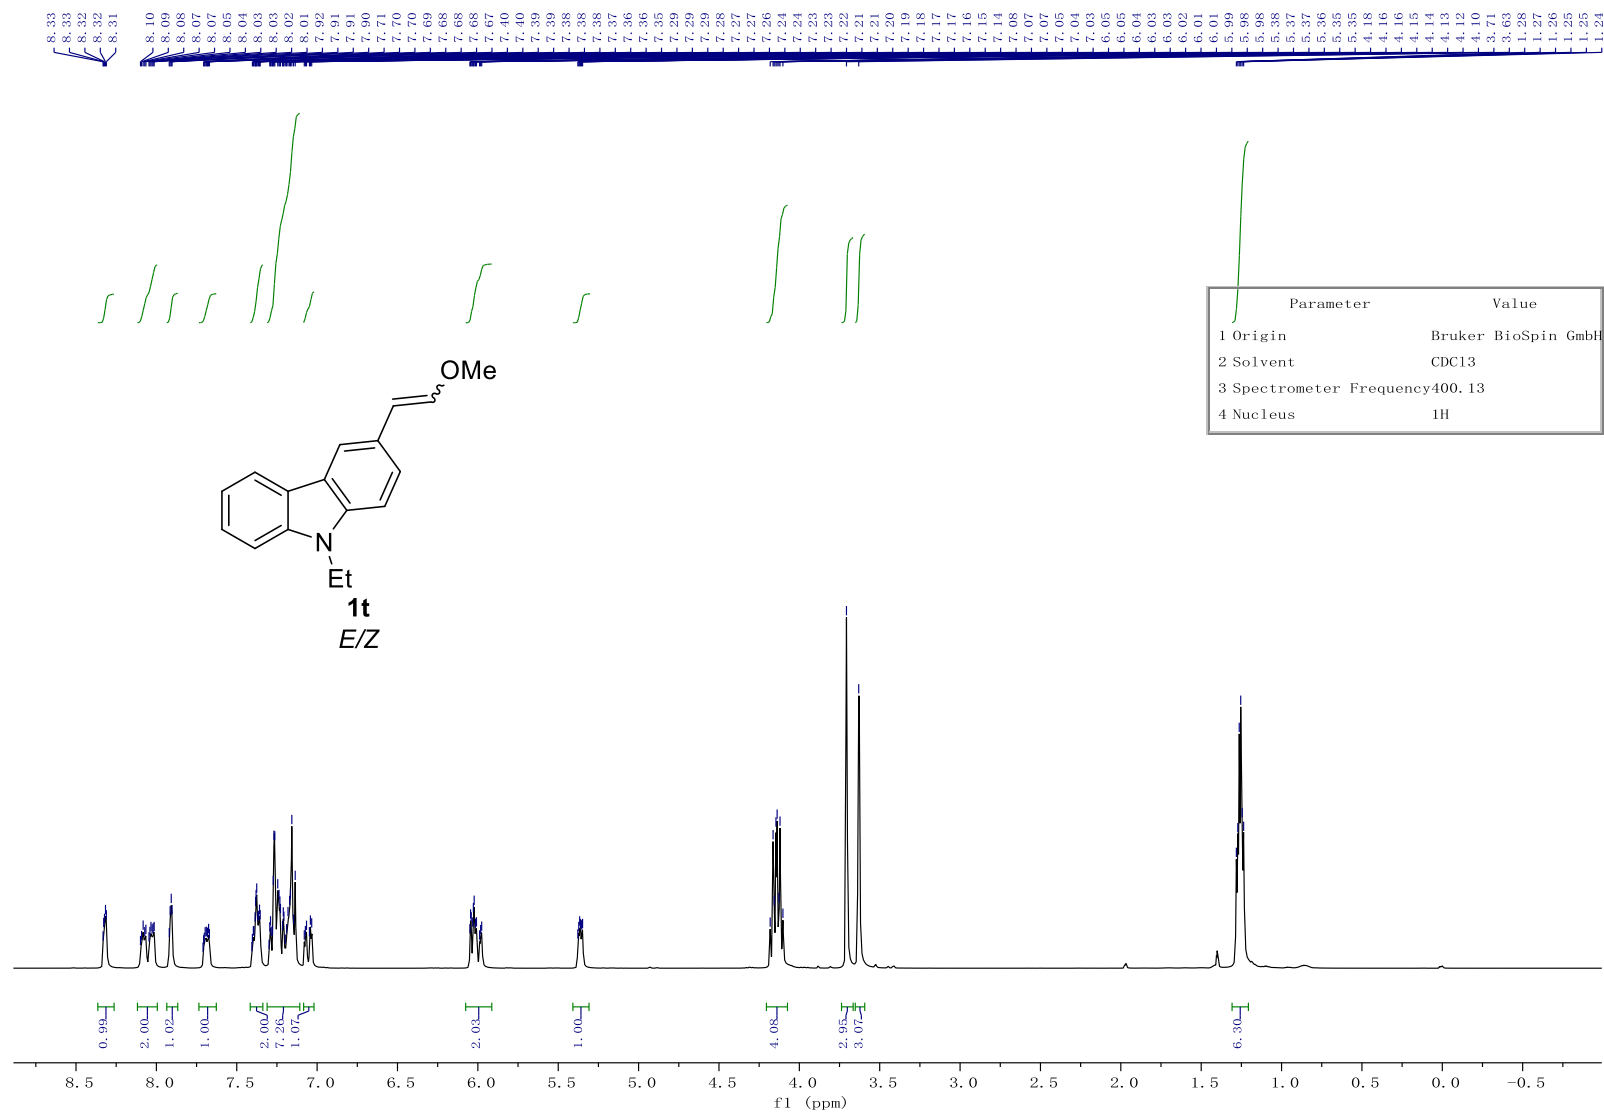

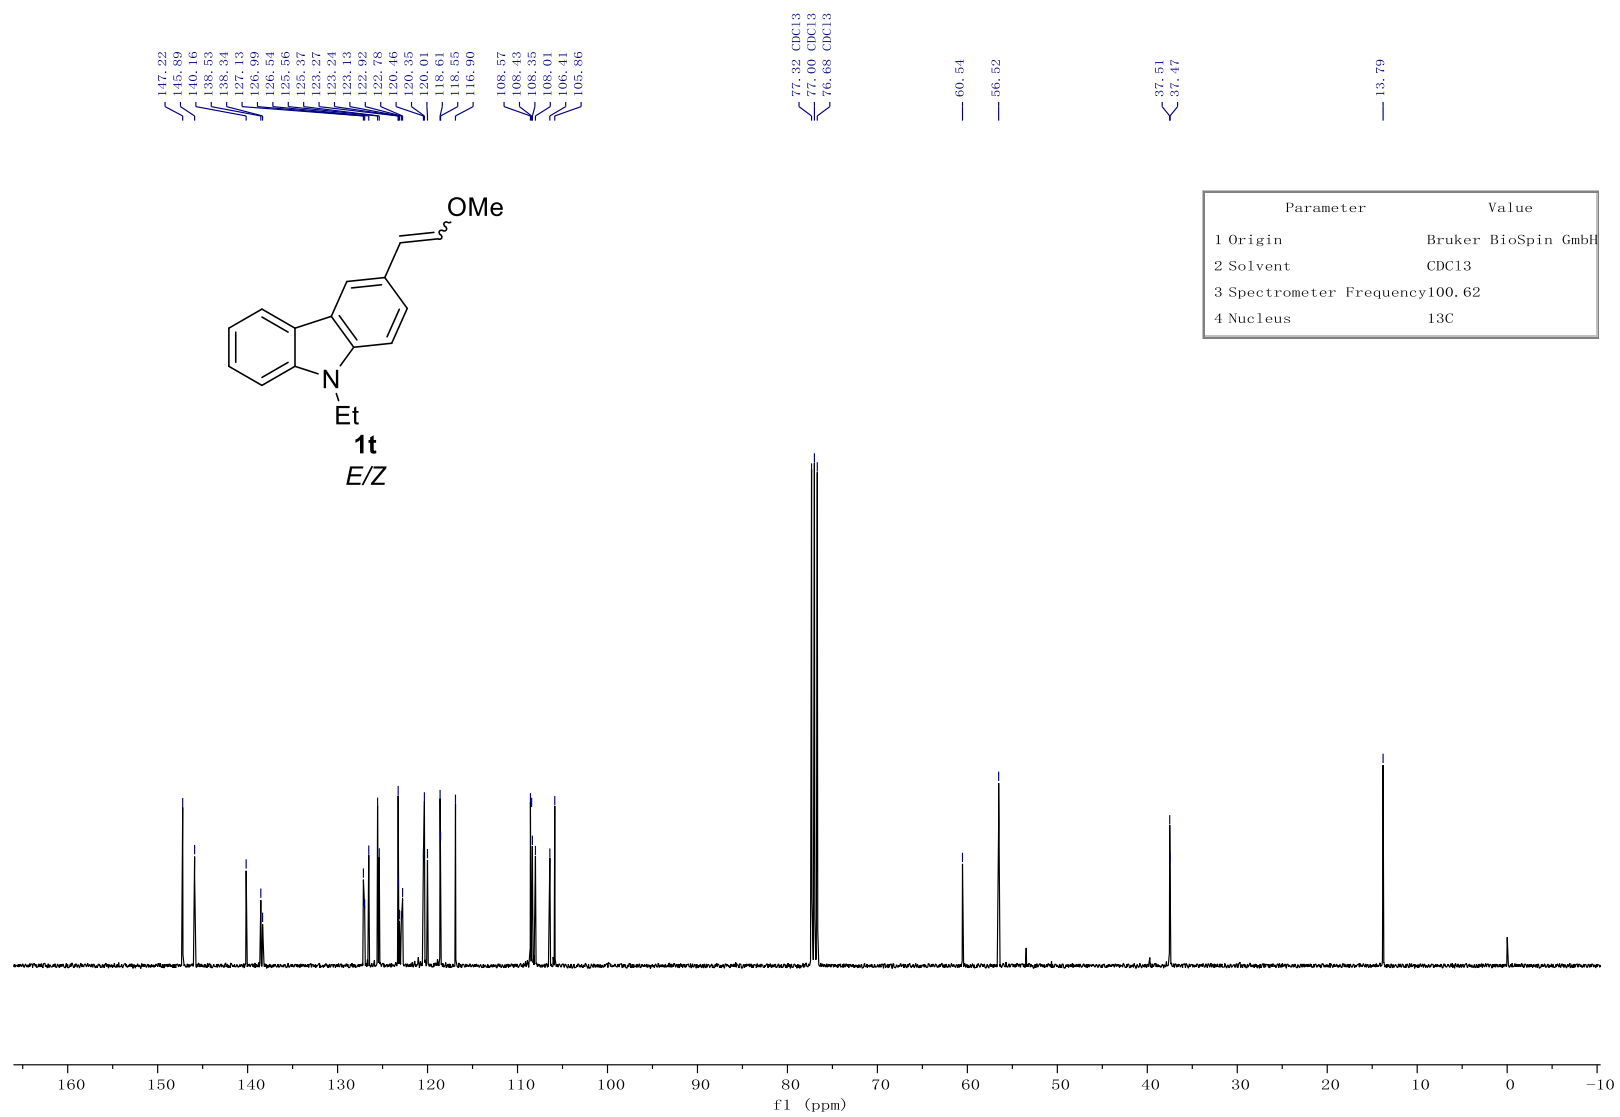

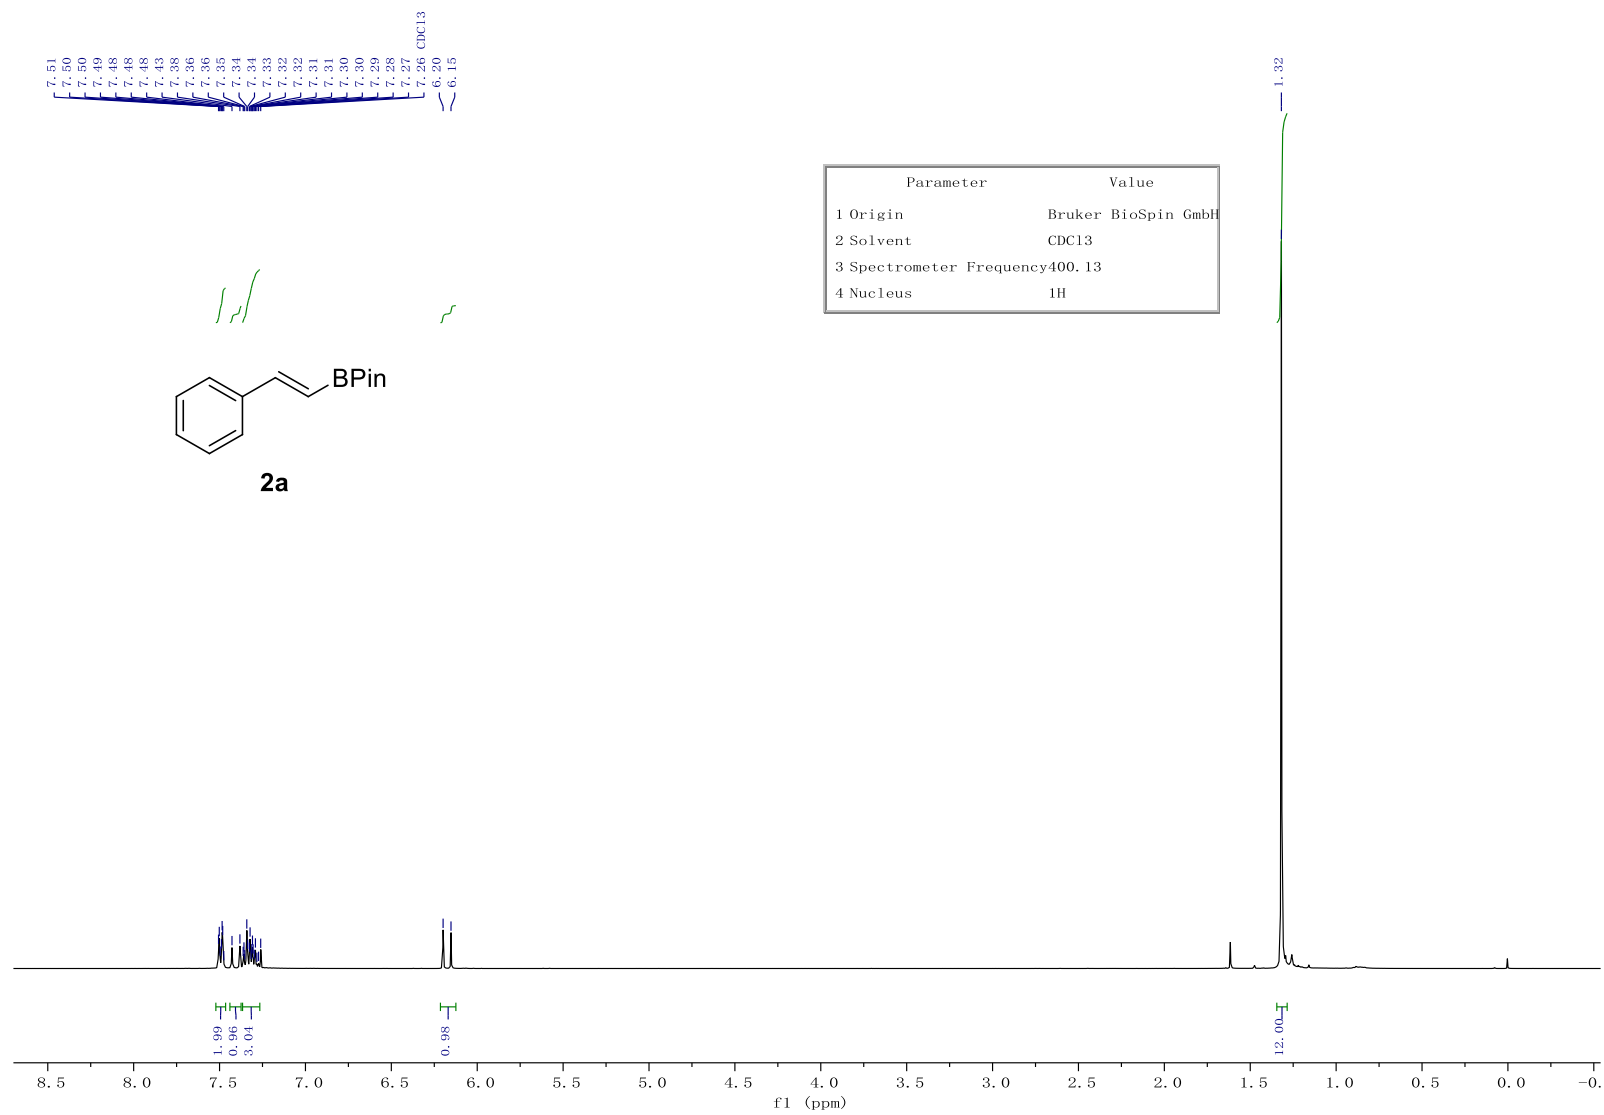

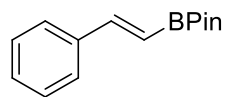

**2a**

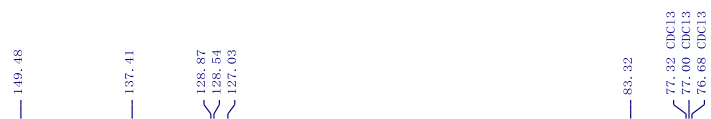

| Parameter                | Value               |
|--------------------------|---------------------|
| 1 Origin                 | Bruker BioSpin GmbH |
| 2 Solvent                | CDCl3               |
| 3 Spectrometer Frequency | 100.62              |
| 4 Nucleus                | 13C                 |

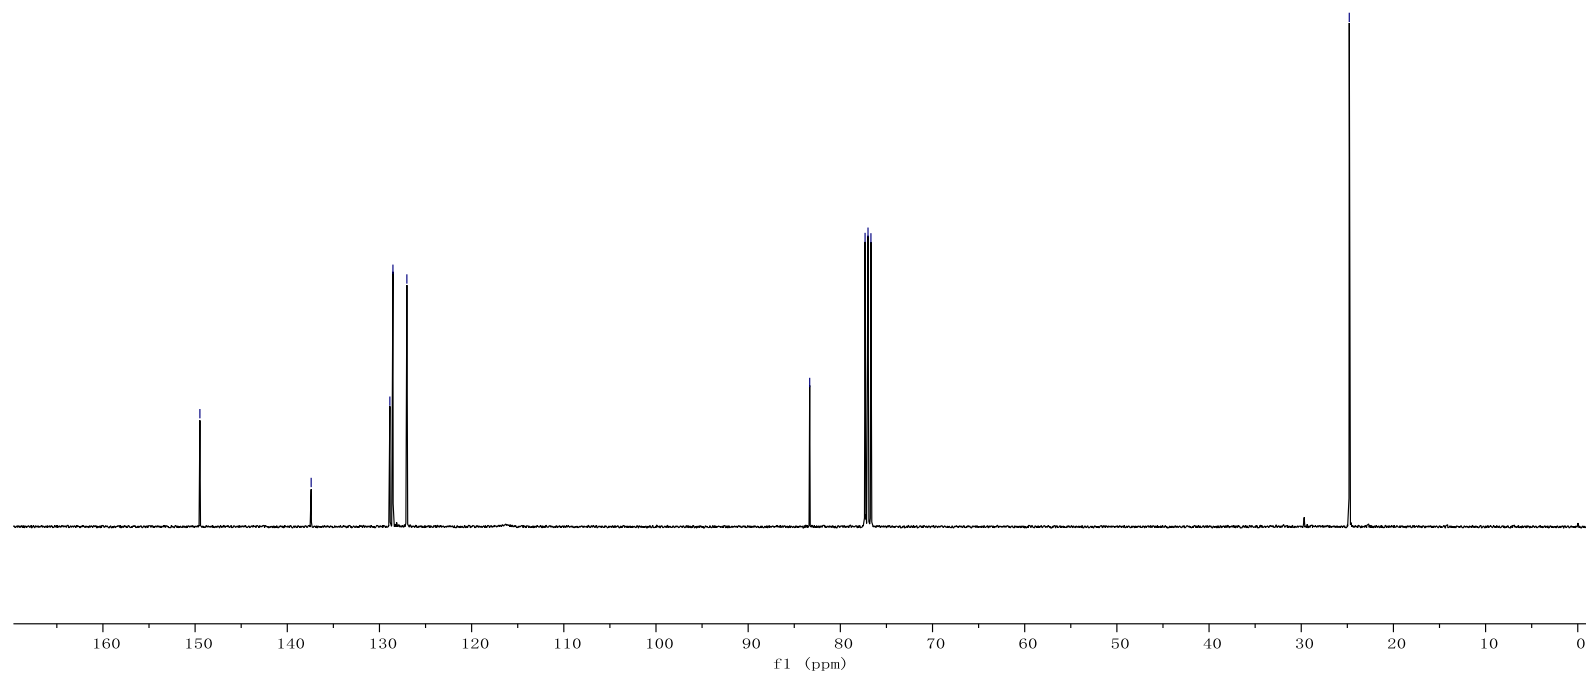

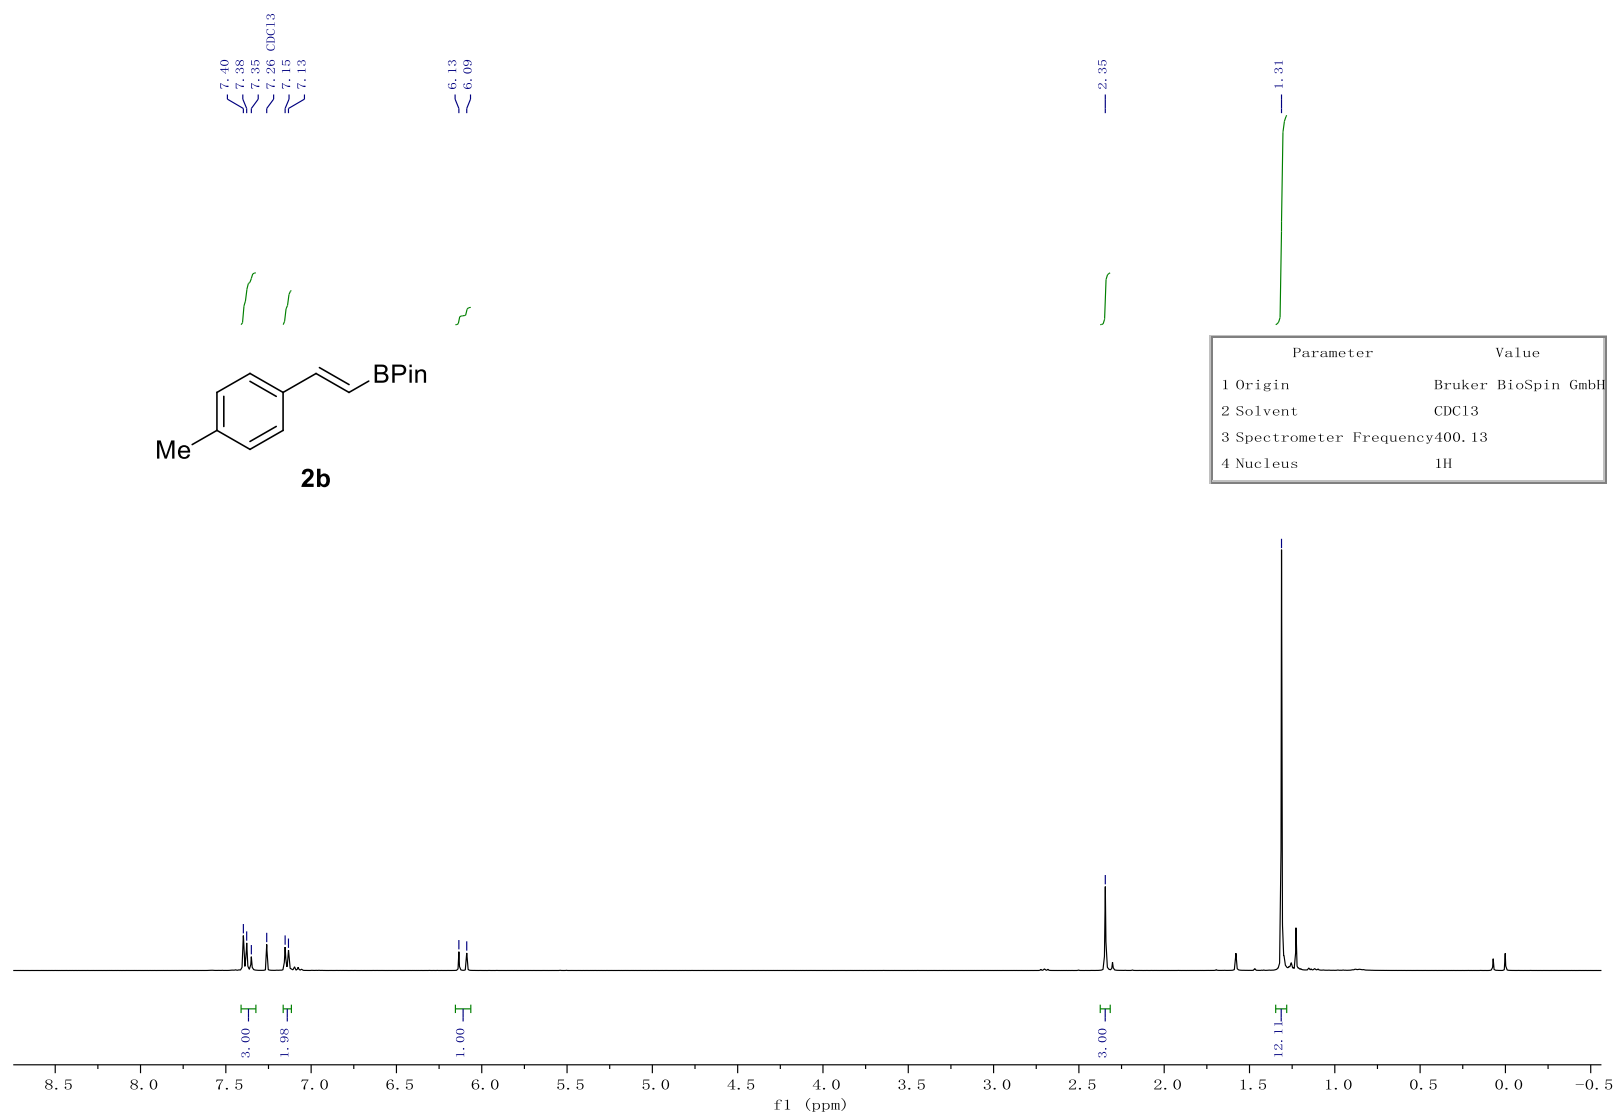

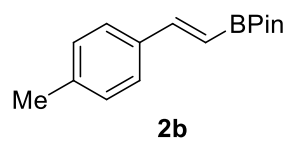

149.45

138.95

134.75

129.27

127.00

83.26

77.32 CDCl<sub>3</sub>

77.00 CDCl<sub>3</sub>

76.68 CDCl<sub>3</sub>

24.80

21.33

| Parameter                | Value               |
|--------------------------|---------------------|
| 1 Origin                 | Bruker BioSpin GmbH |
| 2 Solvent                | CDCl <sub>3</sub>   |
| 3 Spectrometer Frequency | 100.62              |
| 4 Nucleus                | <sup>13</sup> C     |

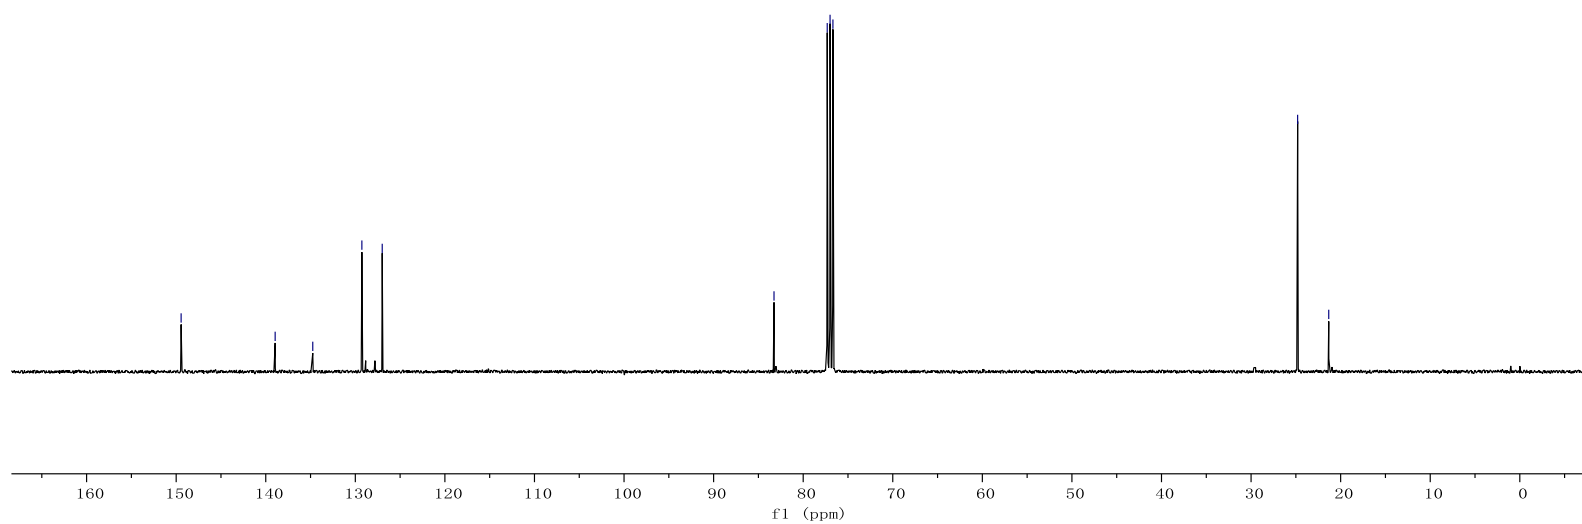



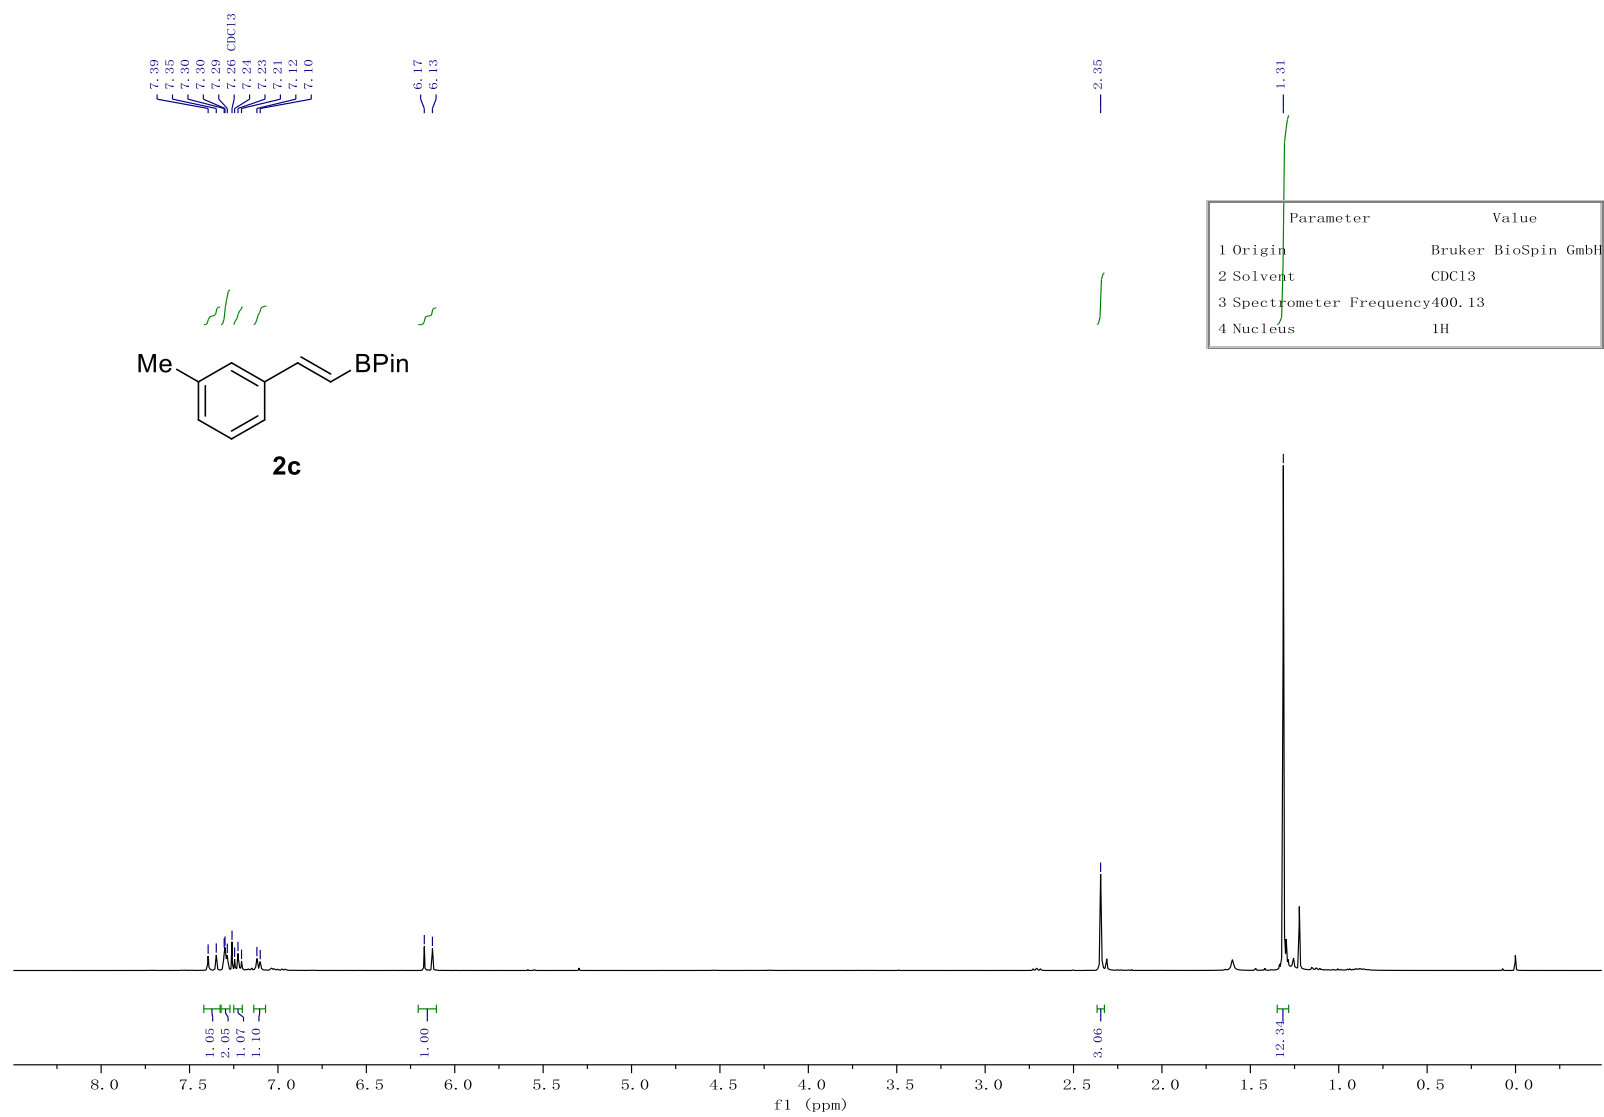

149.65  
138.06  
137.41  
129.68  
128.92  
127.76  
124.21

83.29  
77.32 CDCl<sub>3</sub>  
77.00 CDCl<sub>3</sub>  
76.68 CDCl<sub>3</sub>

24.79  
21.38

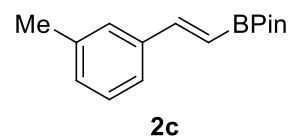

| Parameter                | Value               |
|--------------------------|---------------------|
| 1 Origin                 | Bruker BioSpin GmbH |
| 2 Solvent                | CDCl <sub>3</sub>   |
| 3 Spectrometer Frequency | 100.62              |
| 4 Nucleus                | <sup>13</sup> C     |

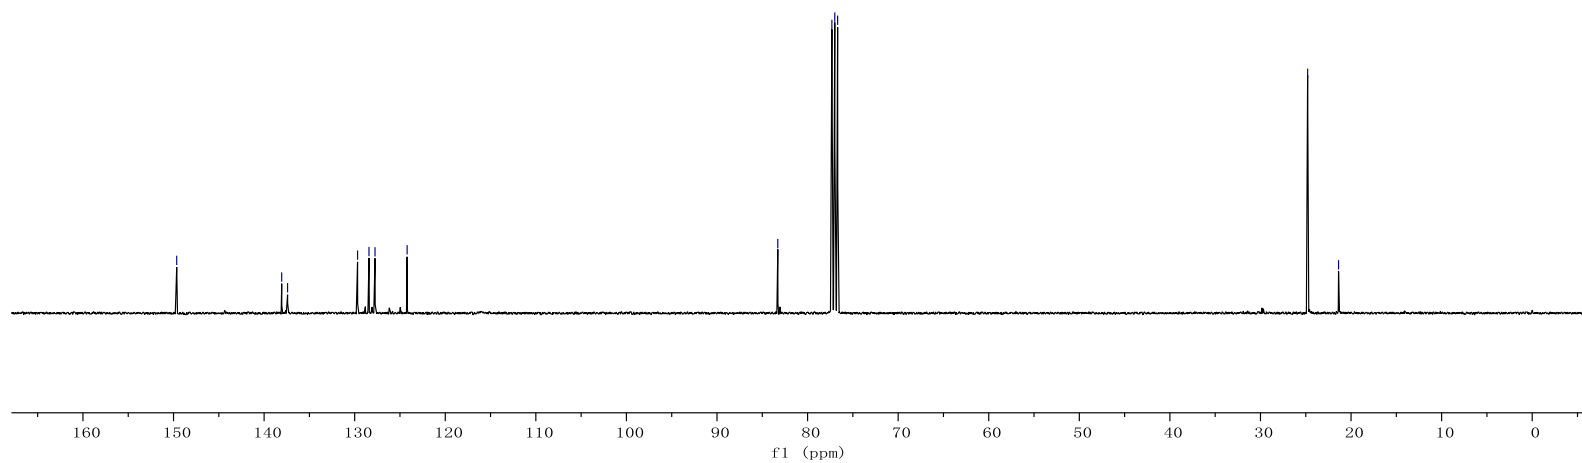

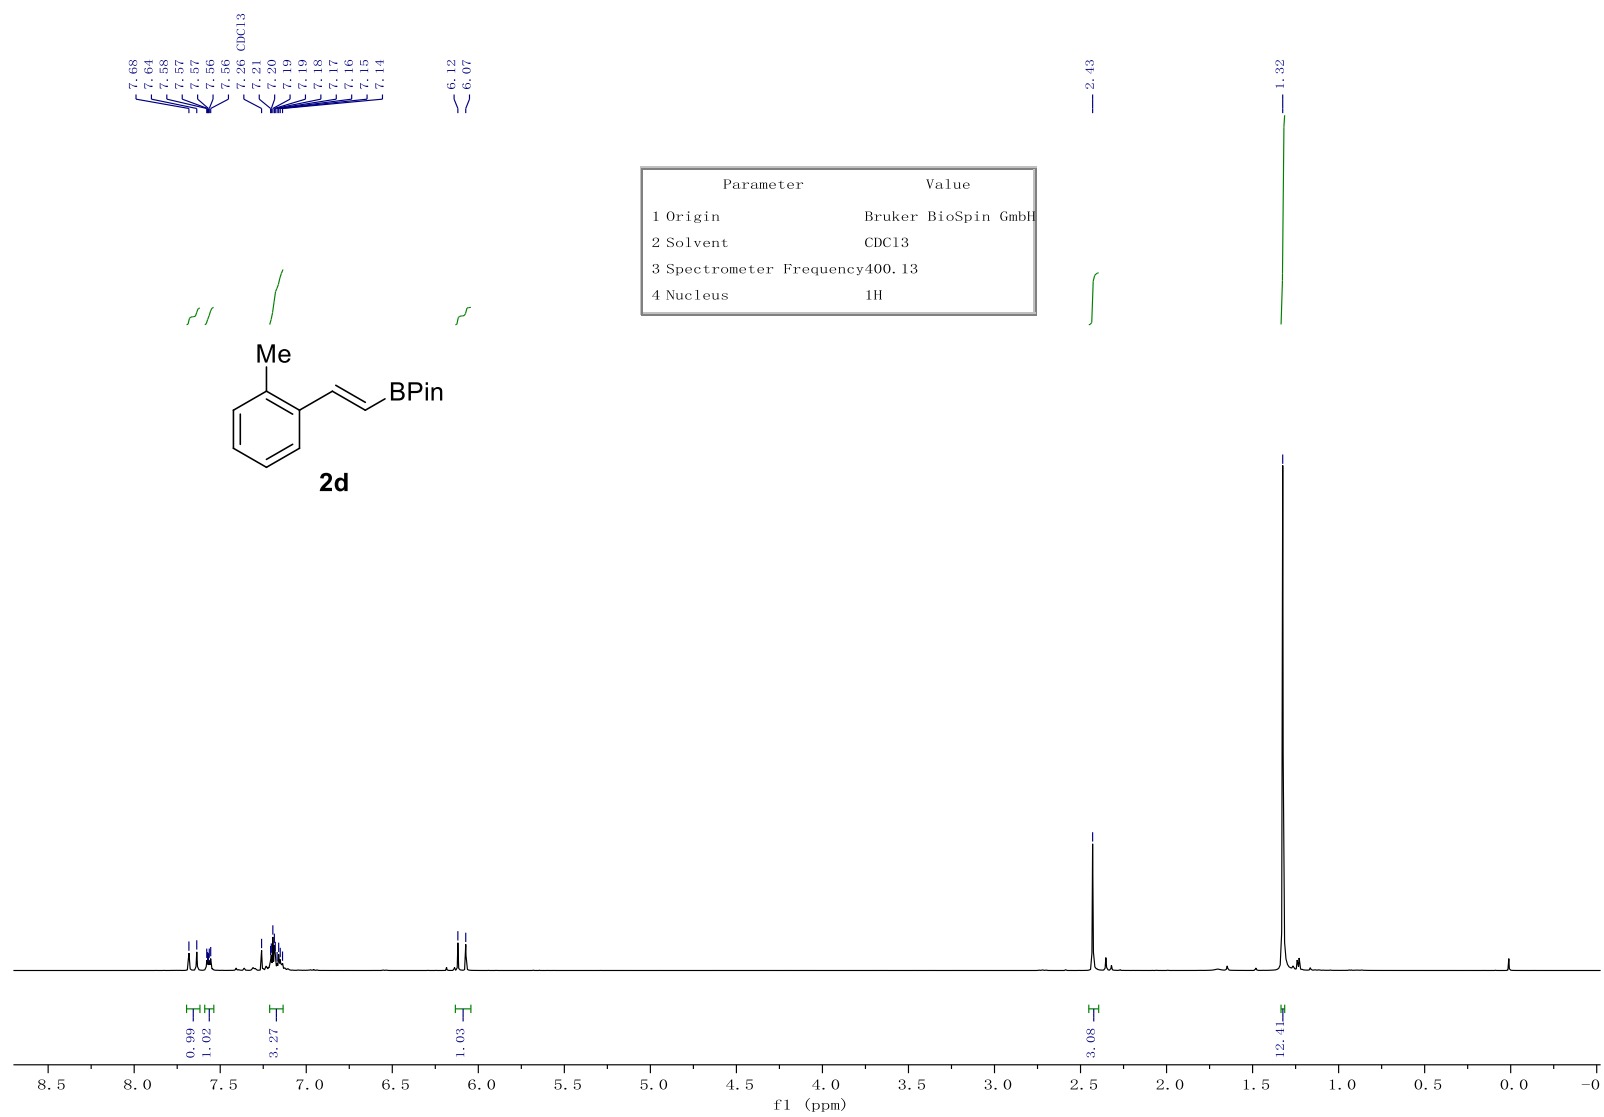

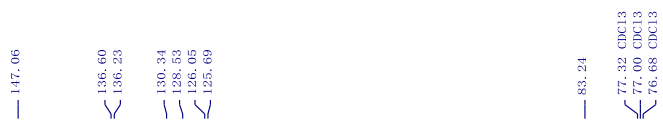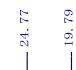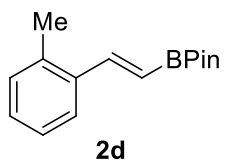

| Parameter                | Value               |
|--------------------------|---------------------|
| 1 Origin                 | Bruker BioSpin GmbH |
| 2 Solvent                | CDC13               |
| 3 Spectrometer Frequency | 100.62              |
| 4 Nucleus                | <sup>13</sup> C     |

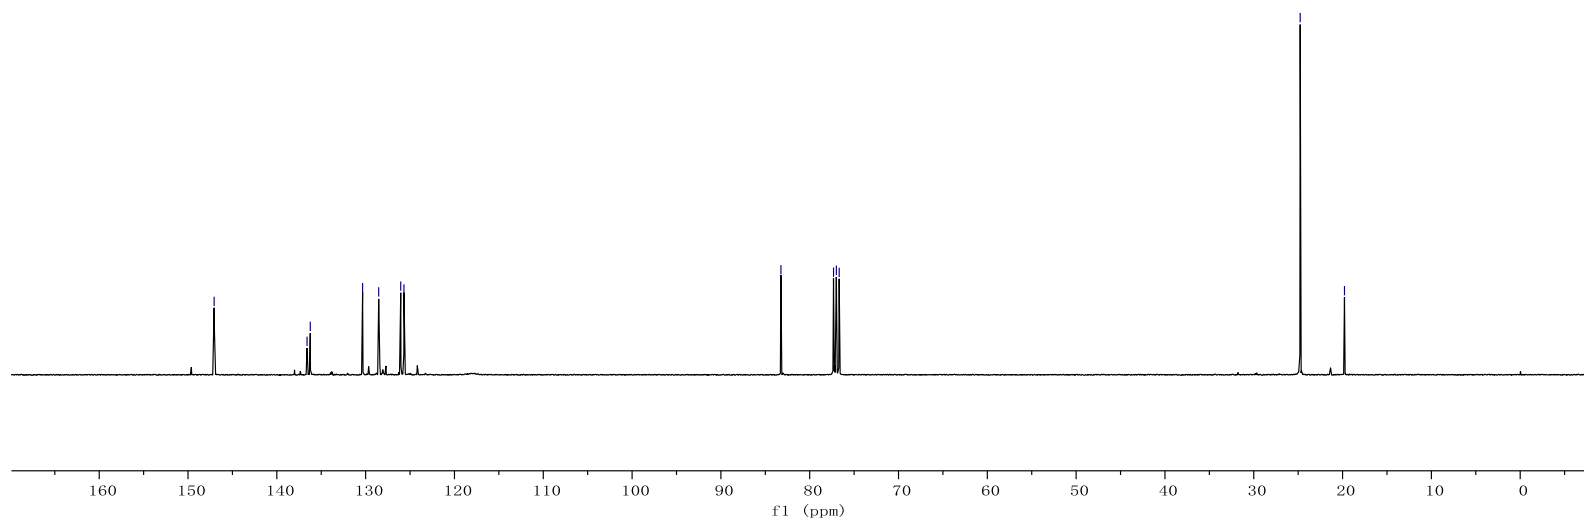

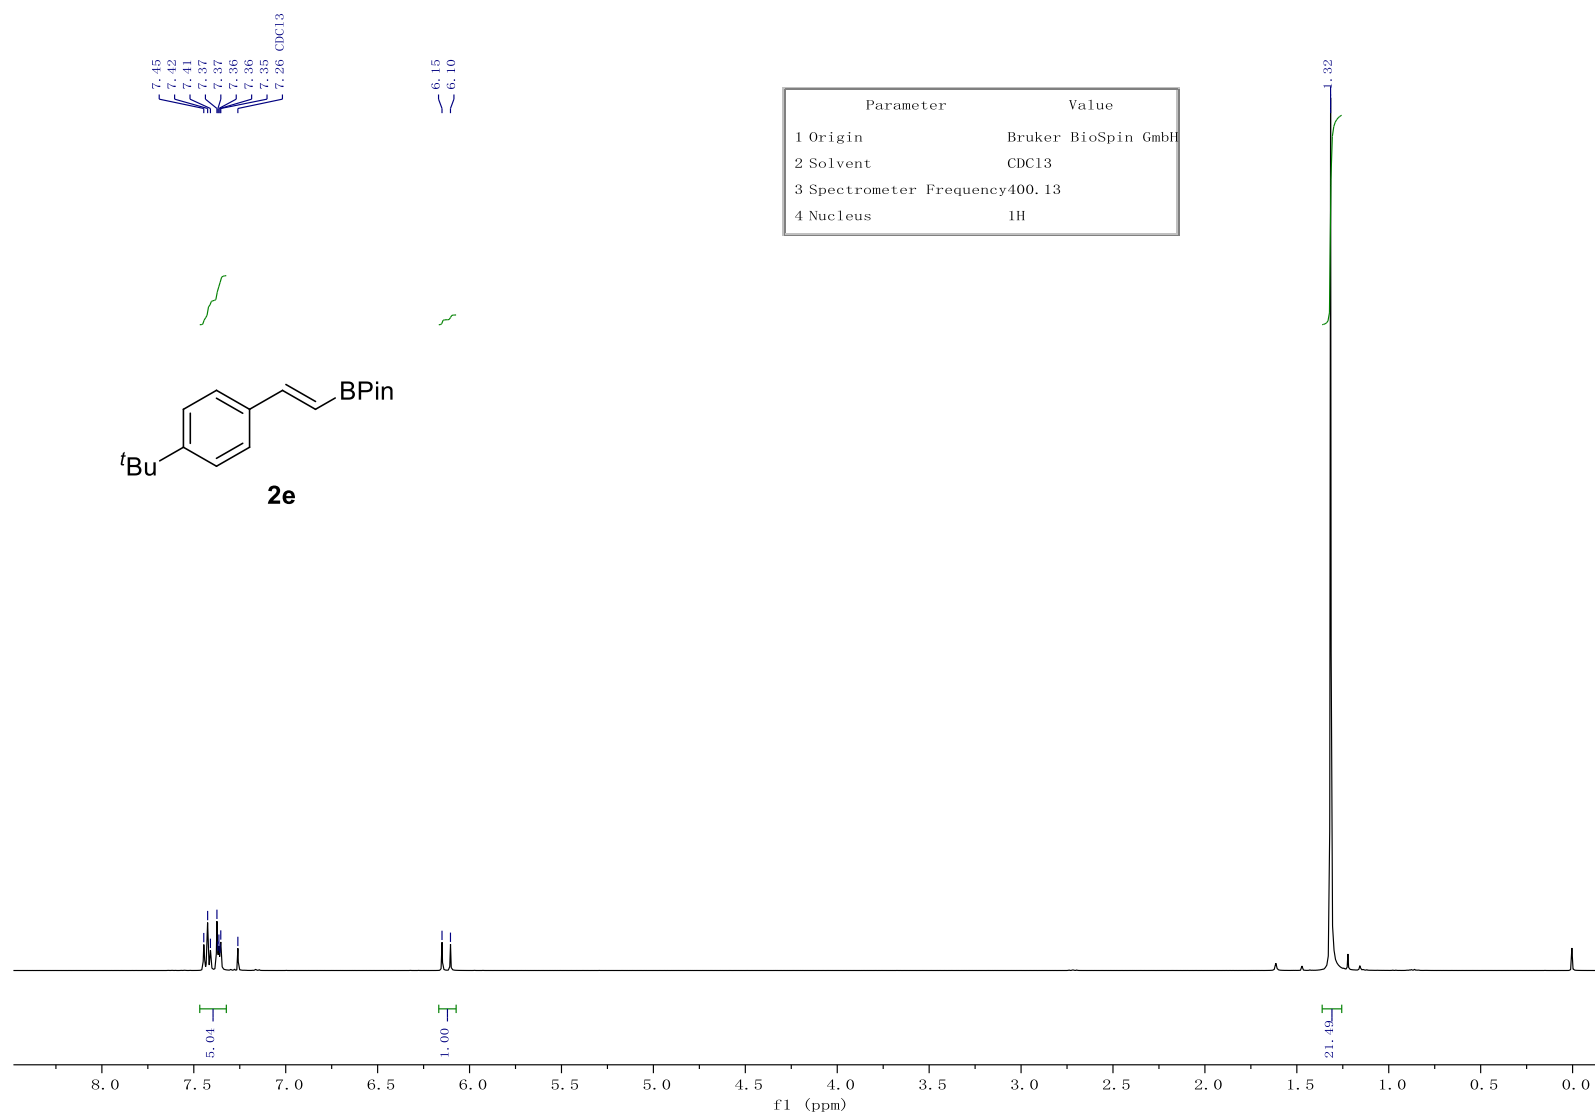

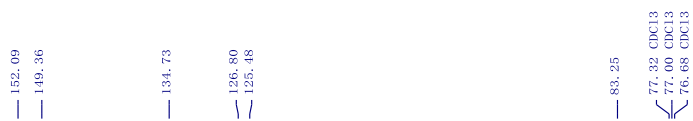

| Parameter                | Value               |
|--------------------------|---------------------|
| 1 Origin                 | Bruker BioSpin GmbH |
| 2 Solvent                | CDCl <sub>3</sub>   |
| 3 Spectrometer Frequency | 100.62              |
| 4 Nucleus                | <sup>13</sup> C     |

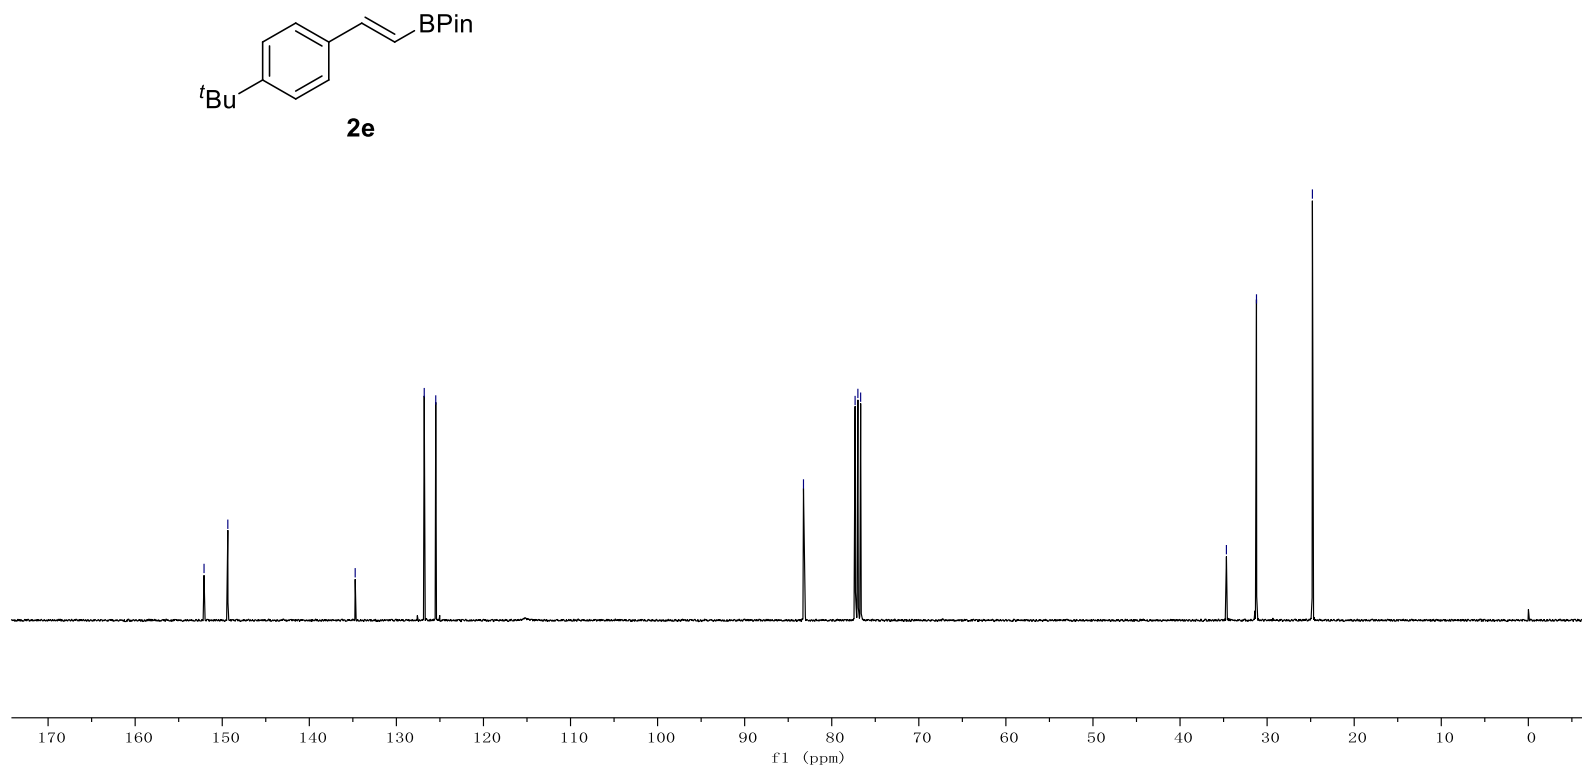

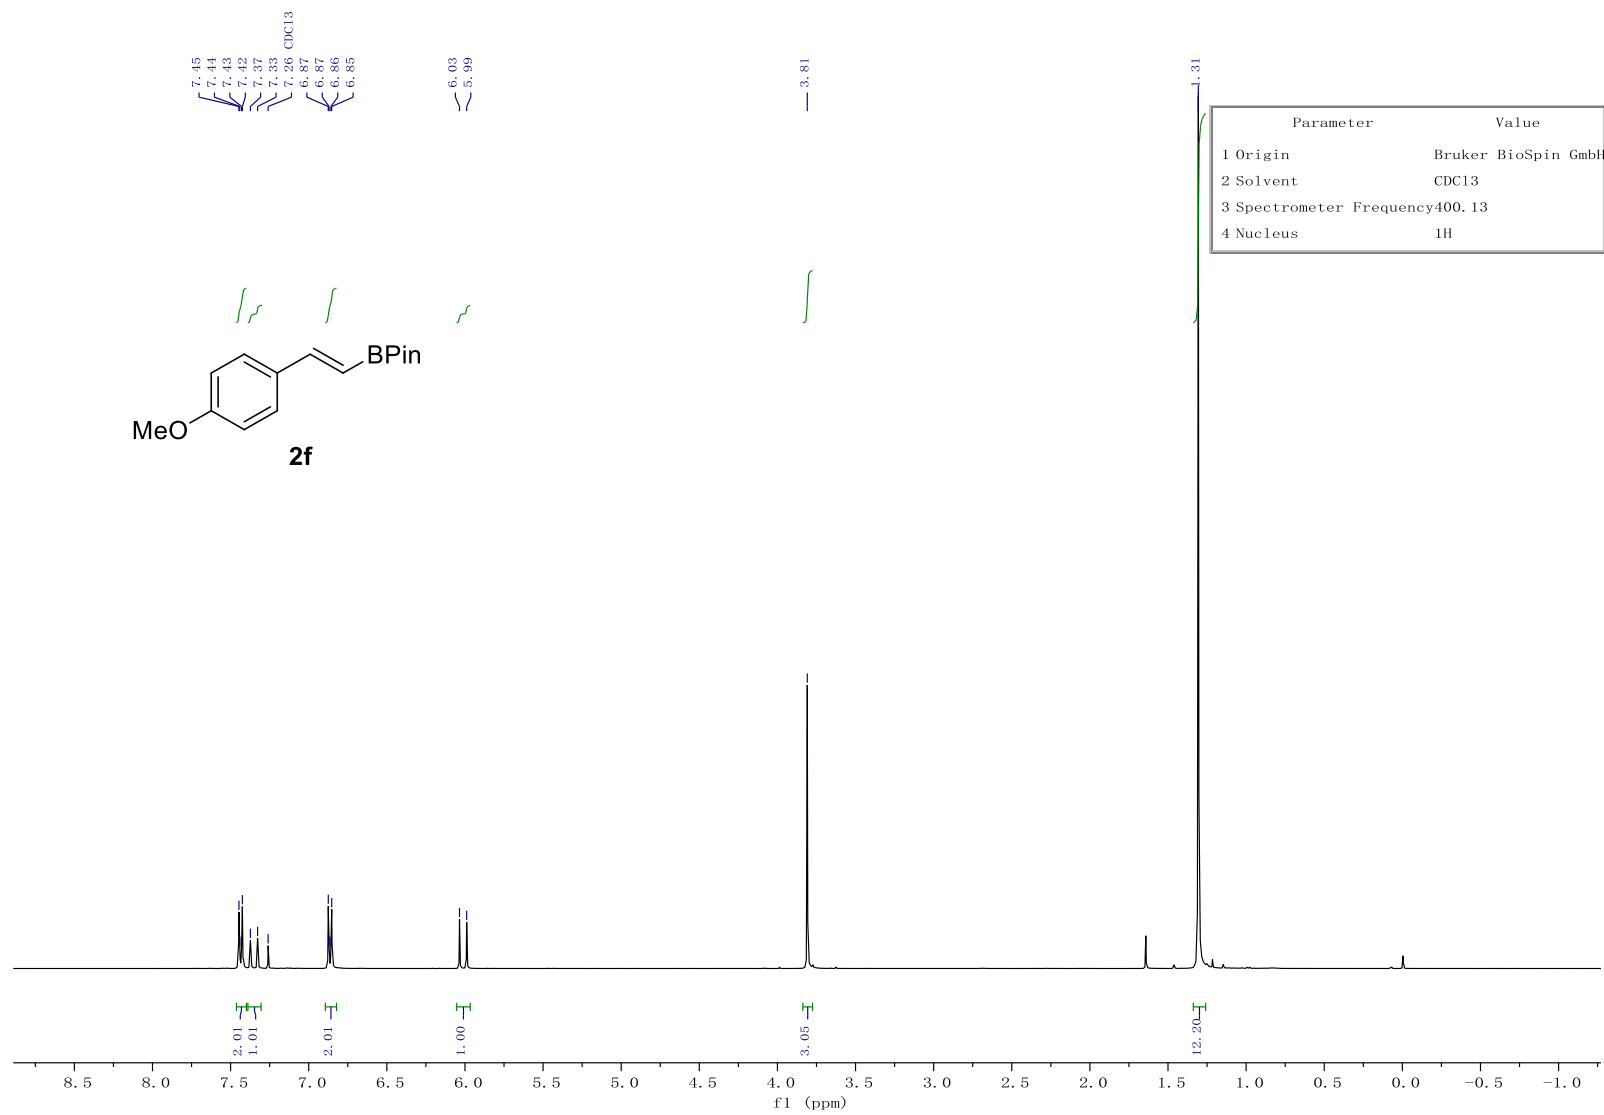

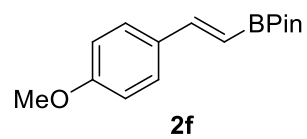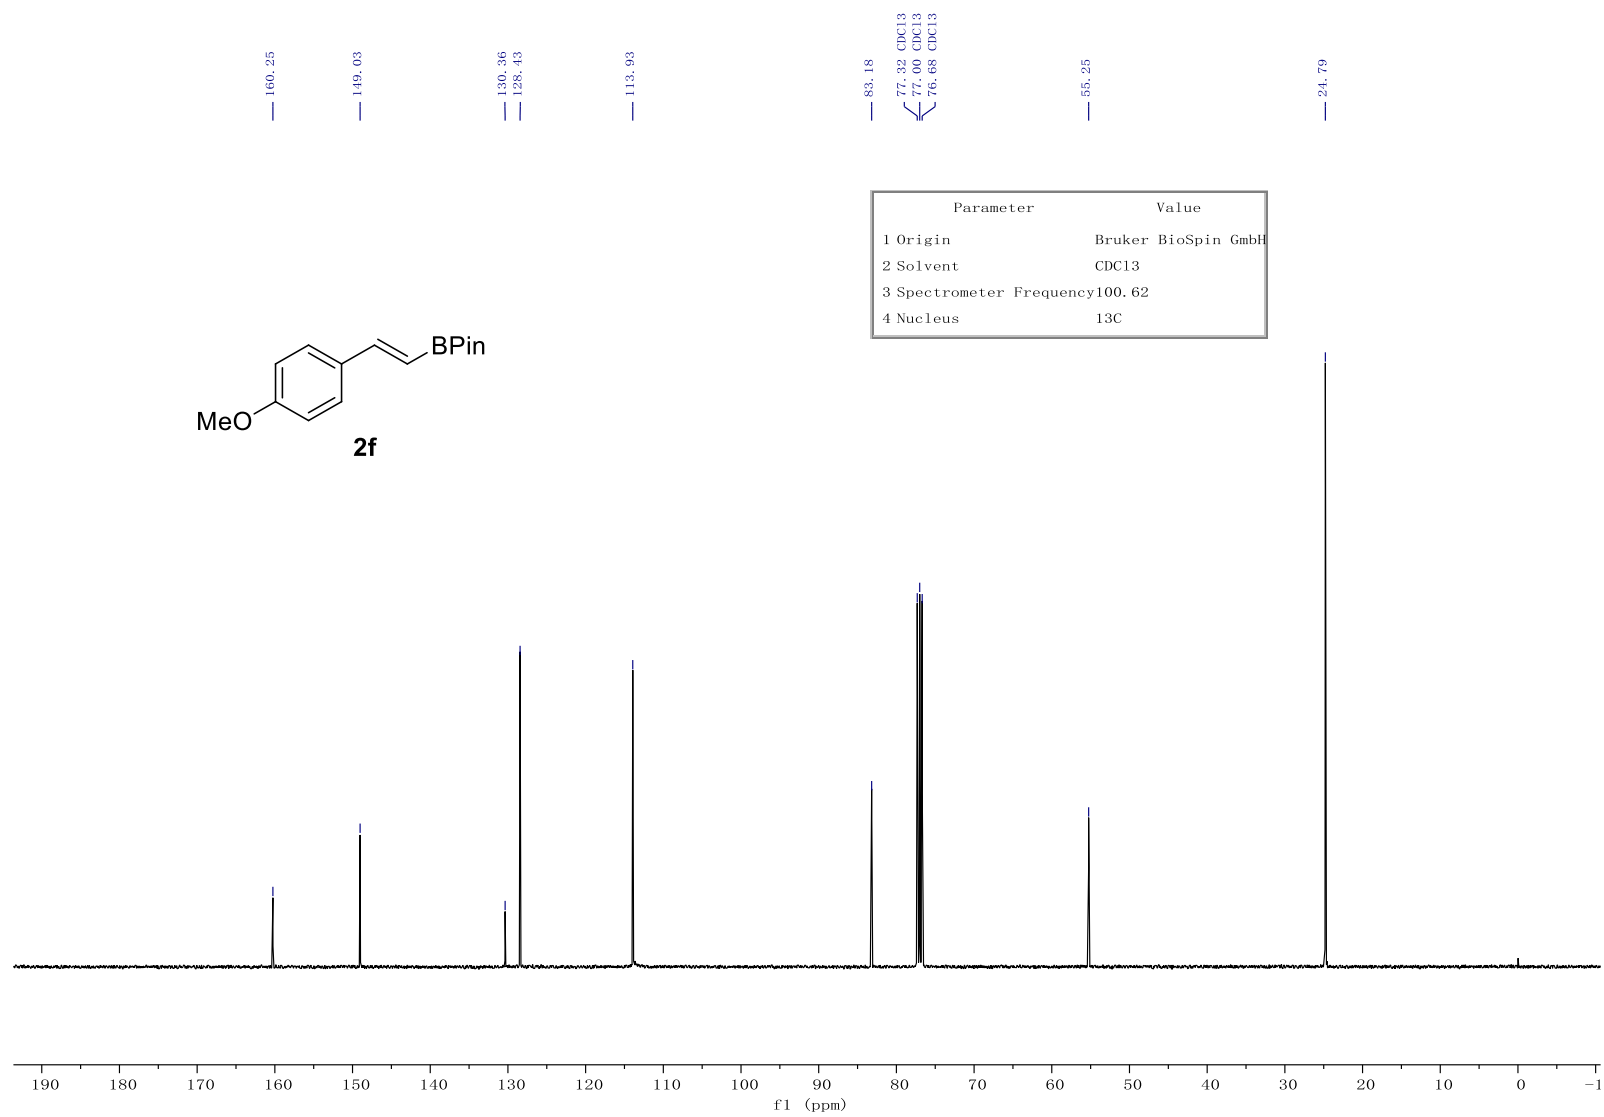



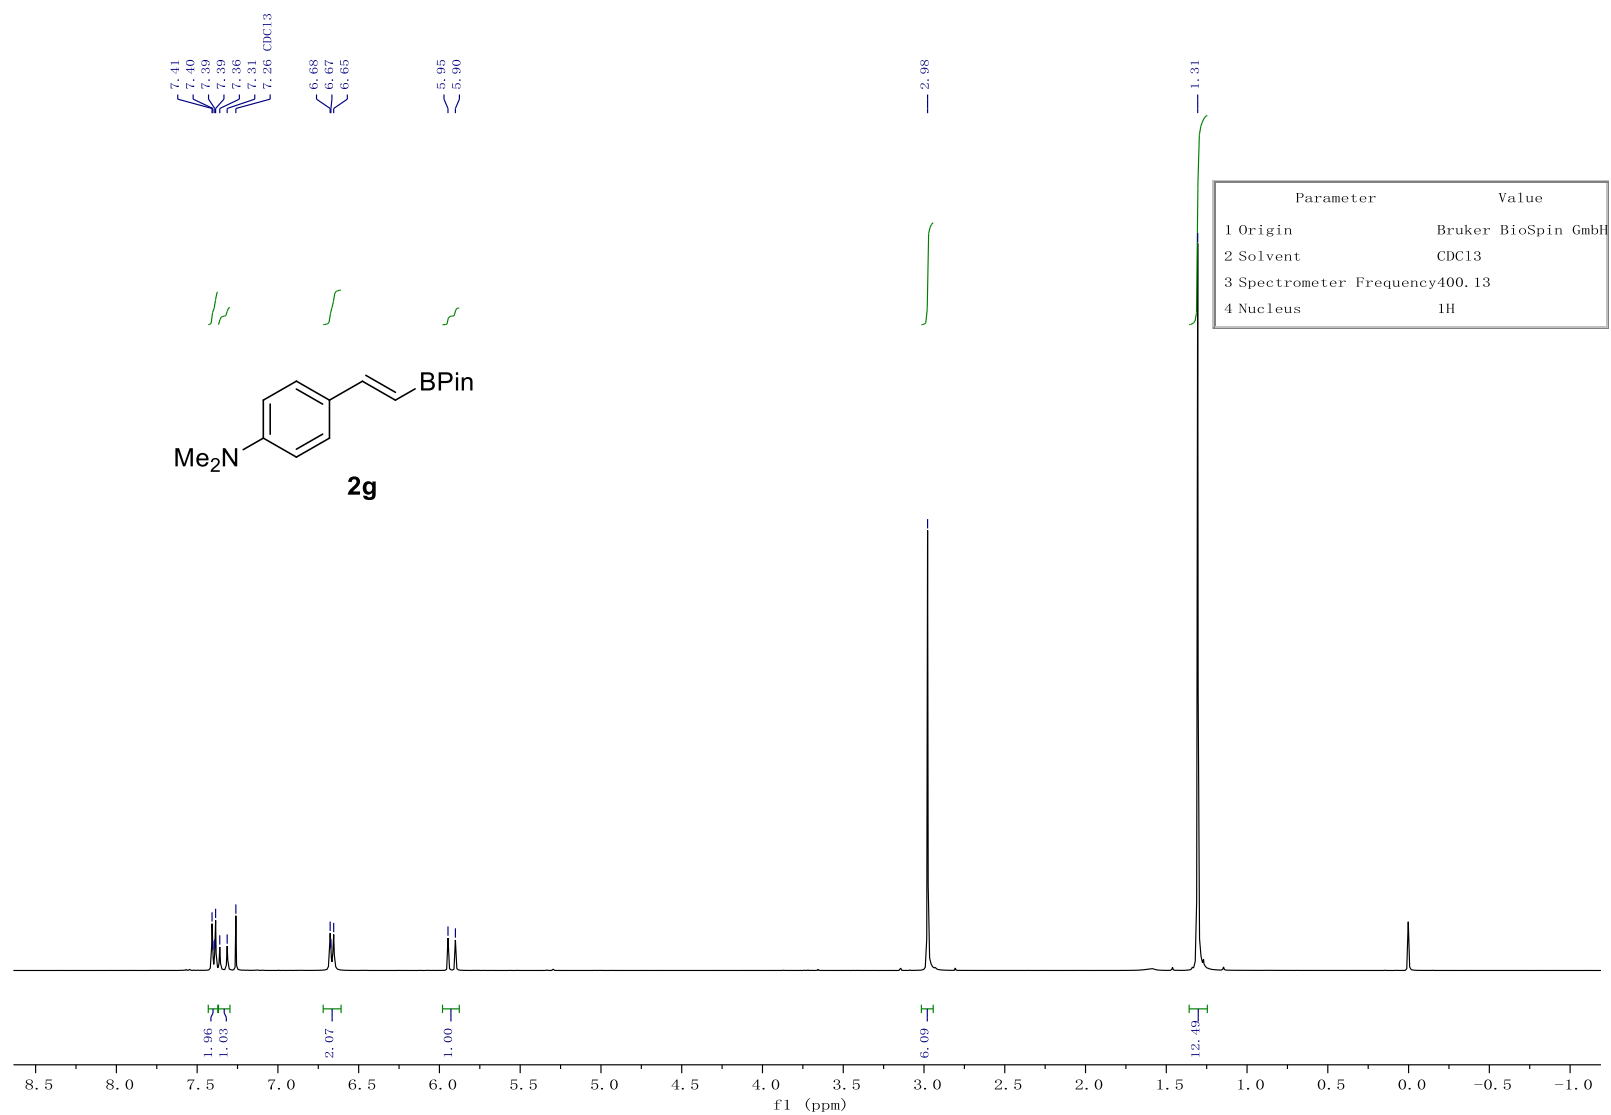

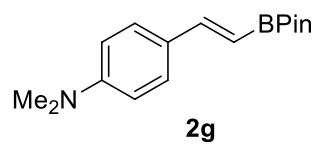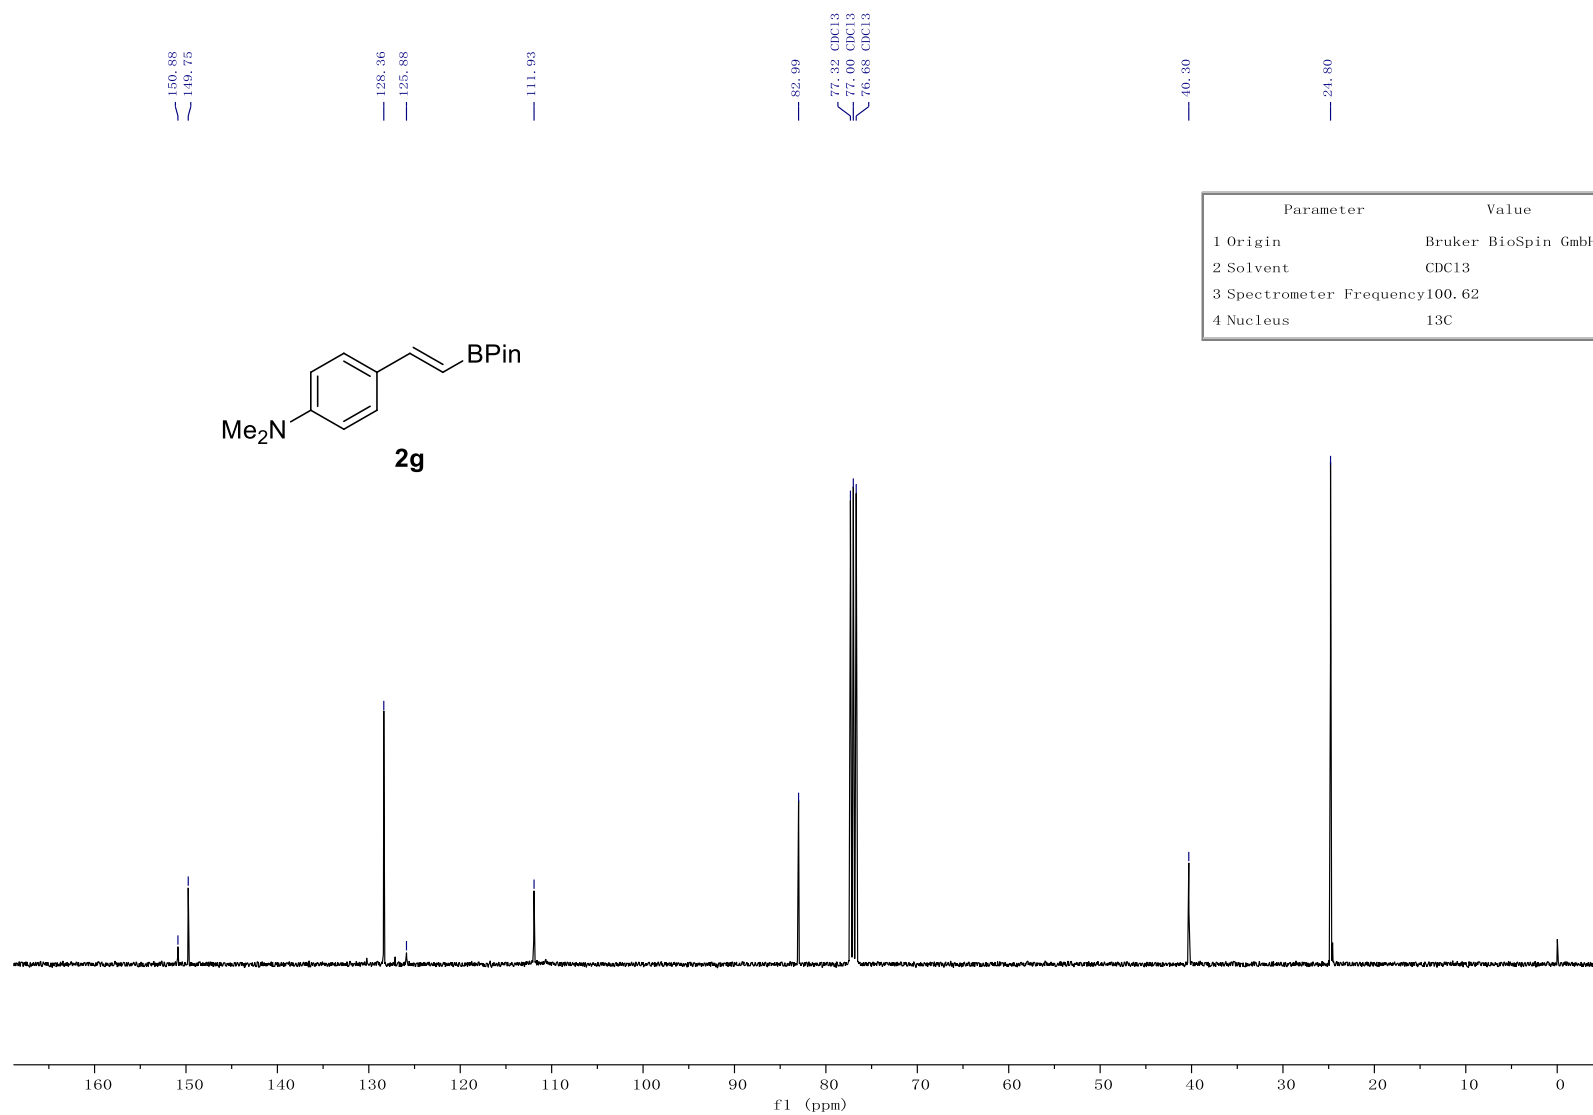

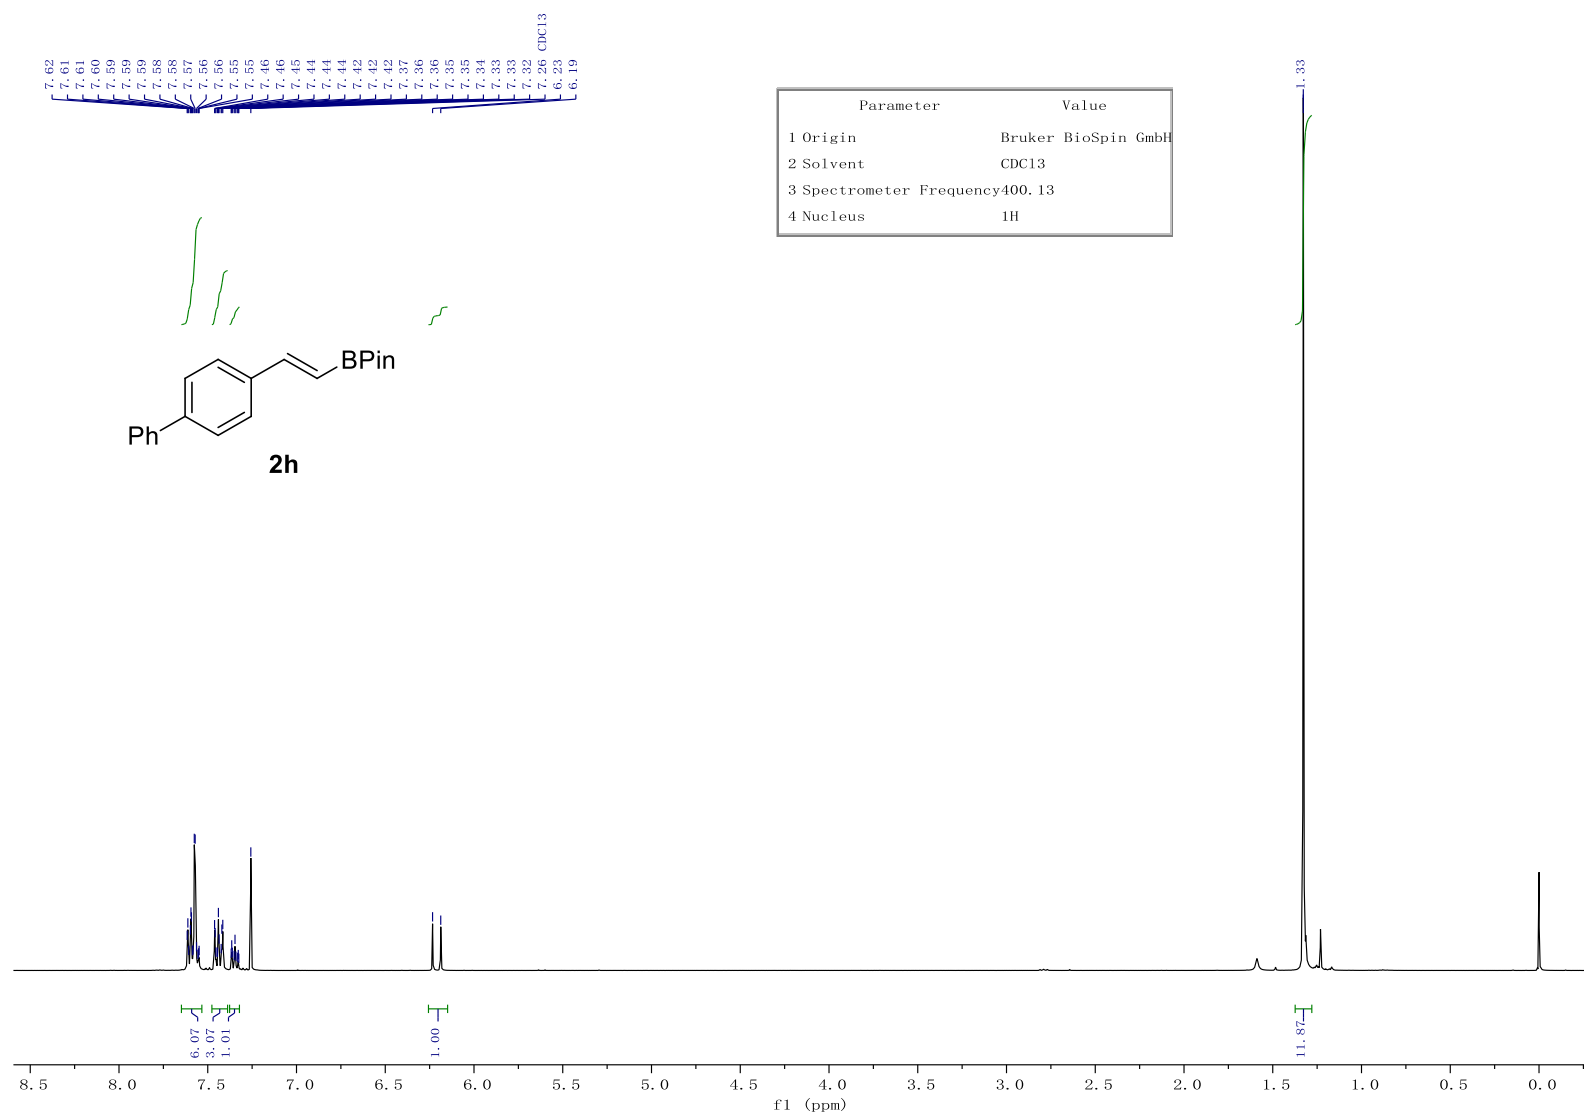

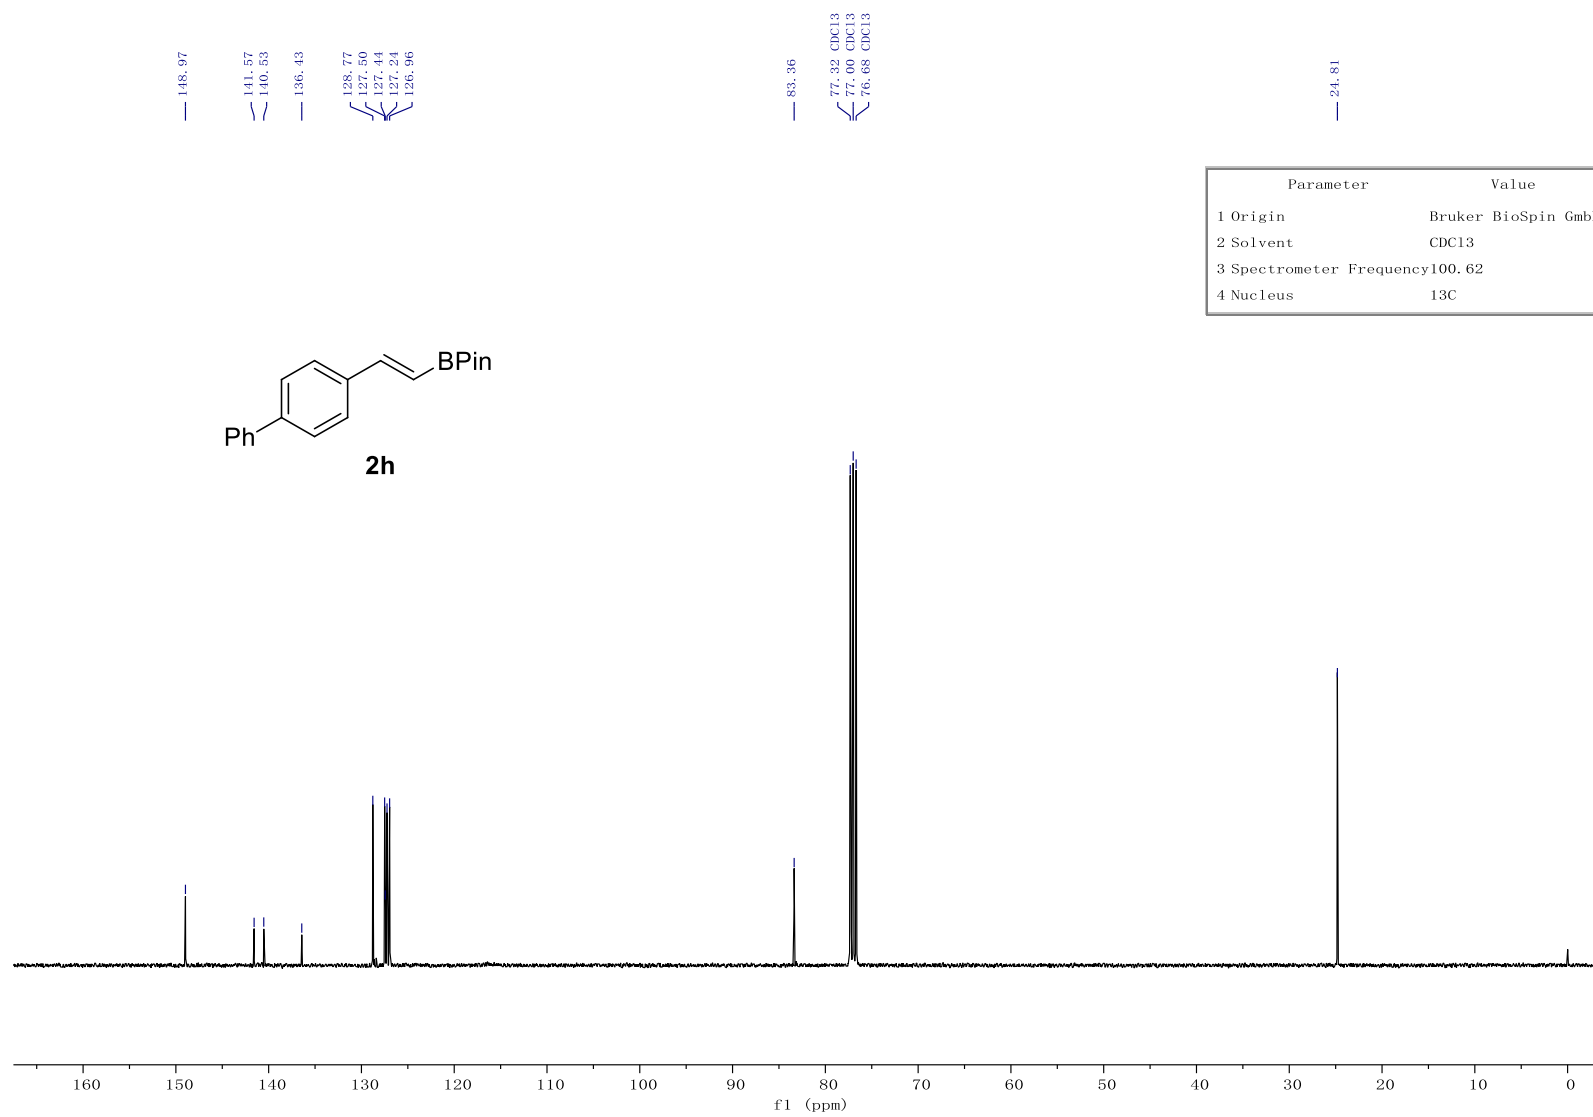

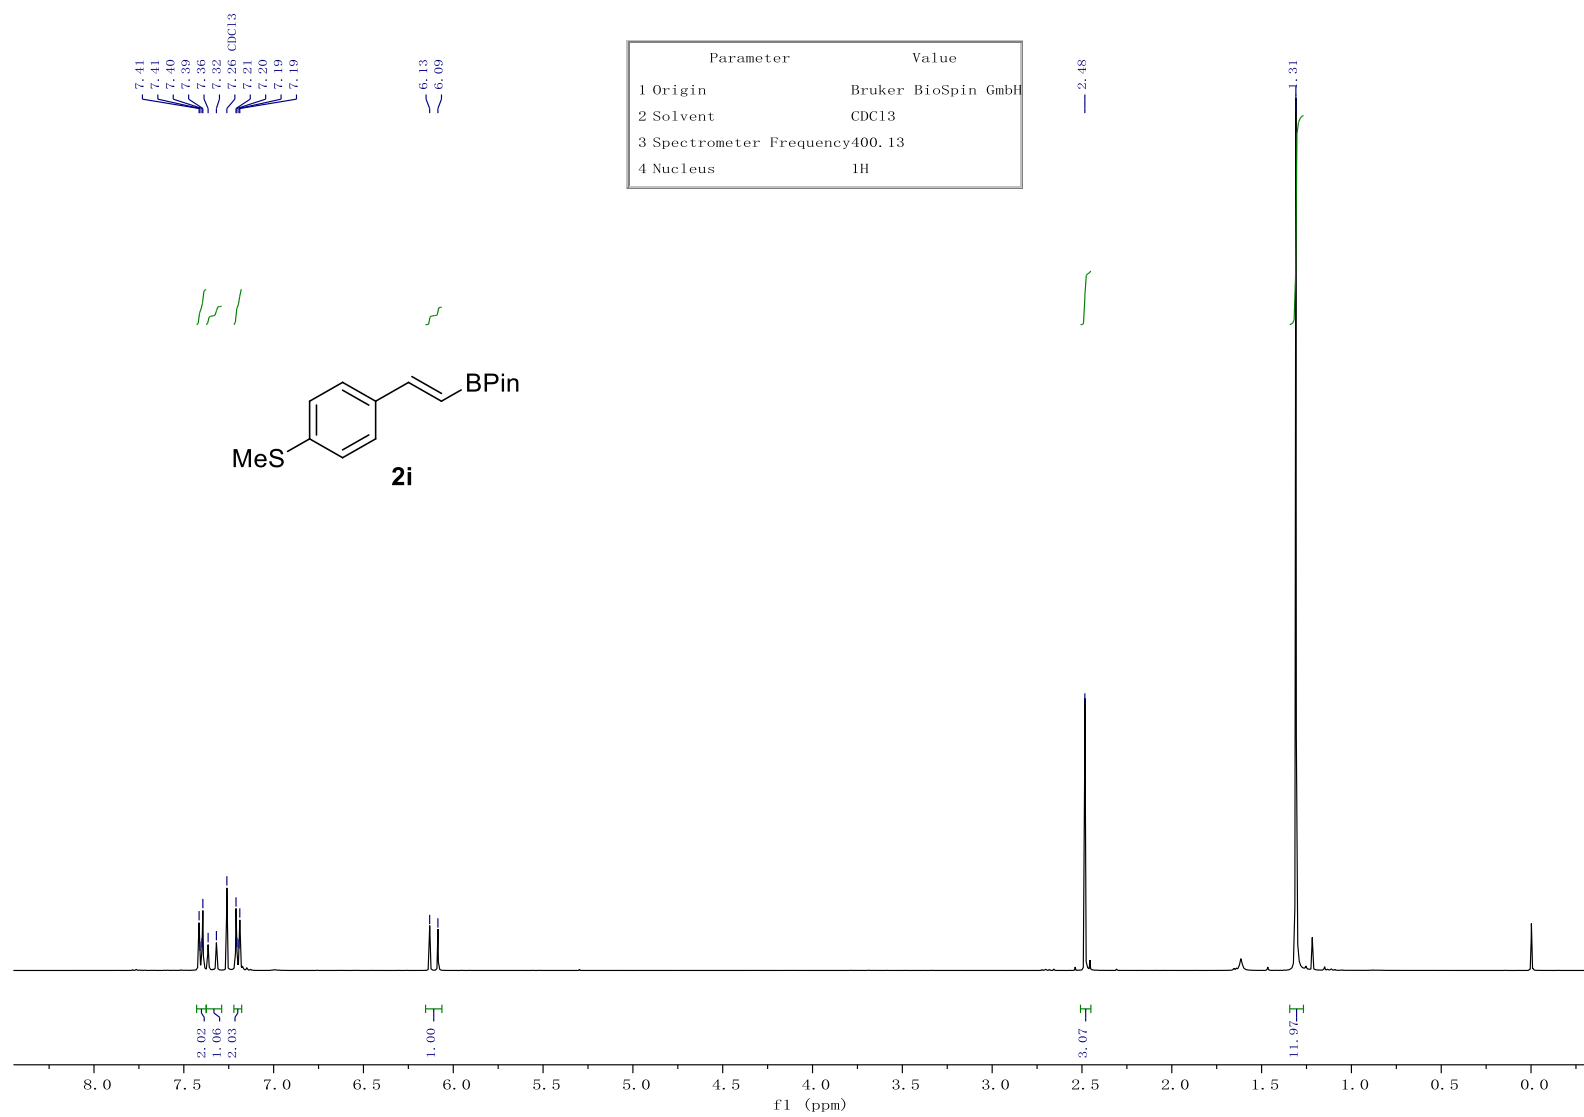

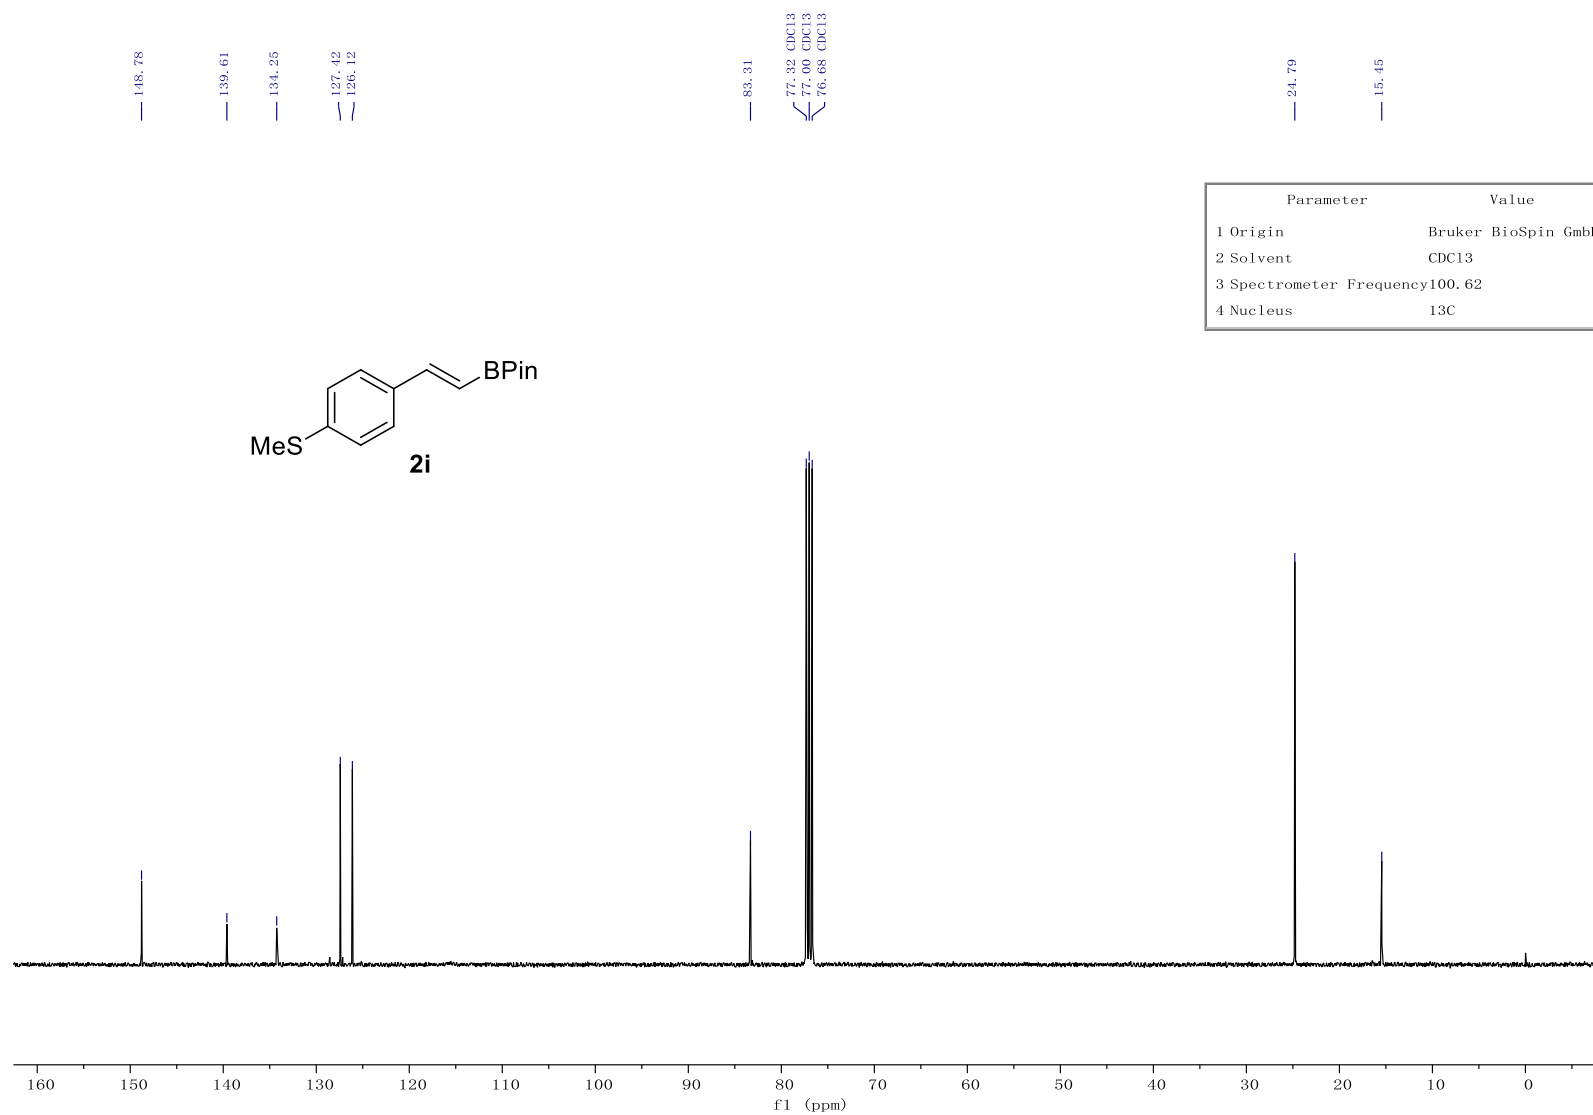

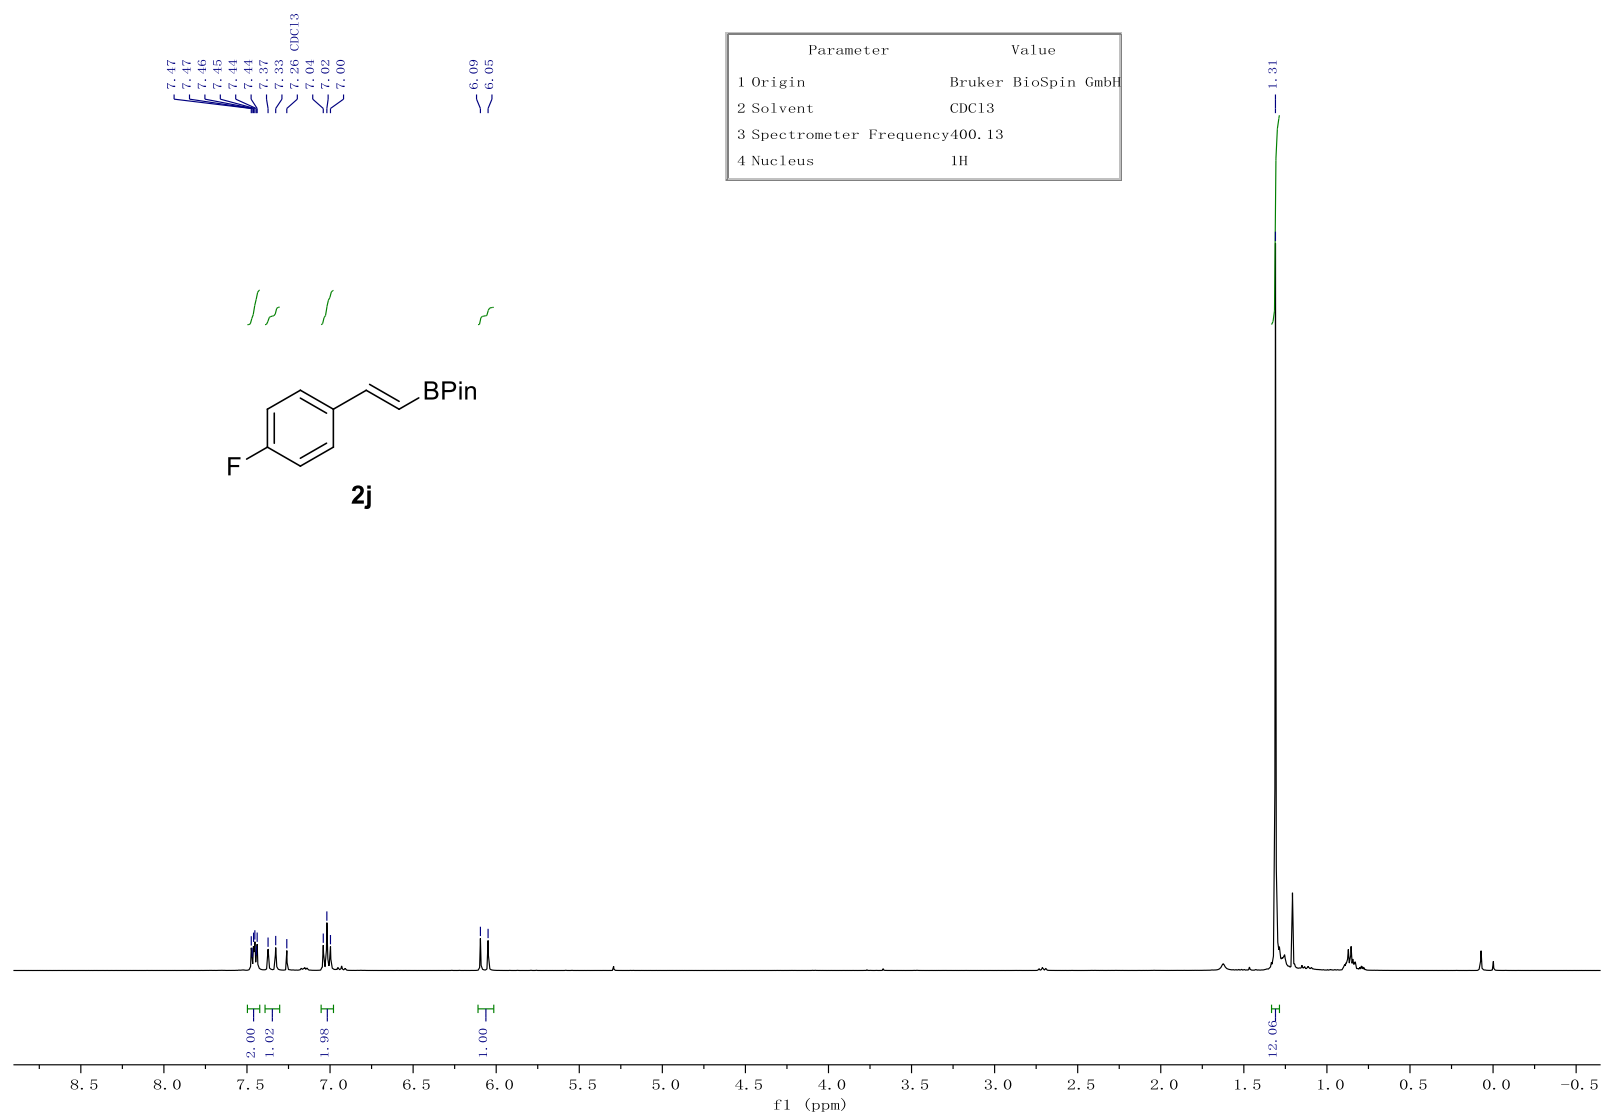

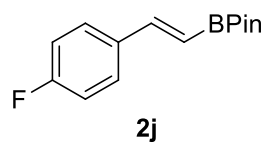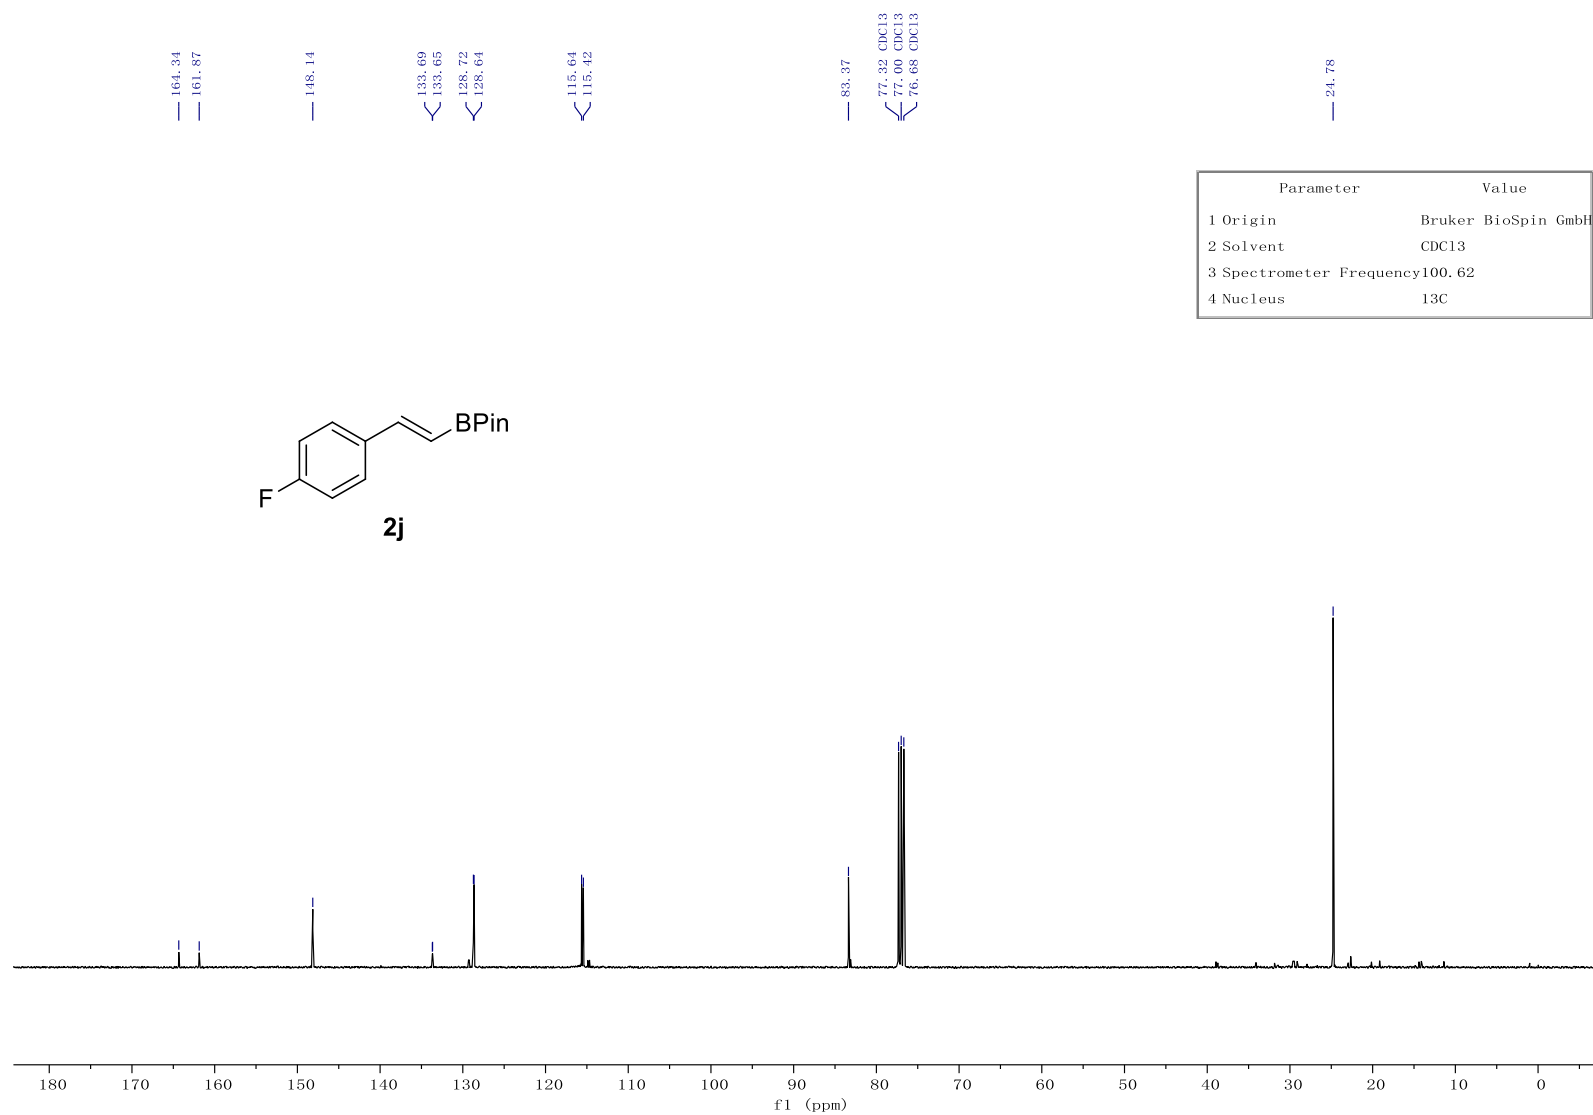



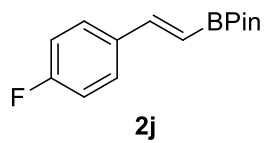

— -112.38

| Parameter                | Value               |
|--------------------------|---------------------|
| 1 Origin                 | Bruker BioSpin GmbH |
| 2 Solvent                | CDCl <sub>3</sub>   |
| 3 Spectrometer Frequency | 376.46              |
| 4 Nucleus                | <sup>19</sup> F     |

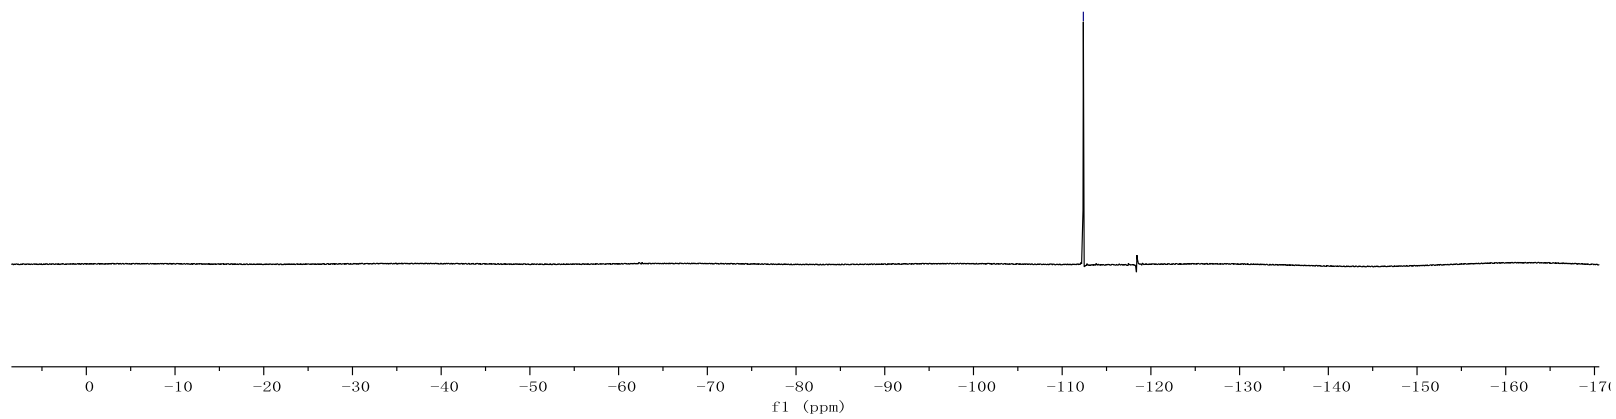

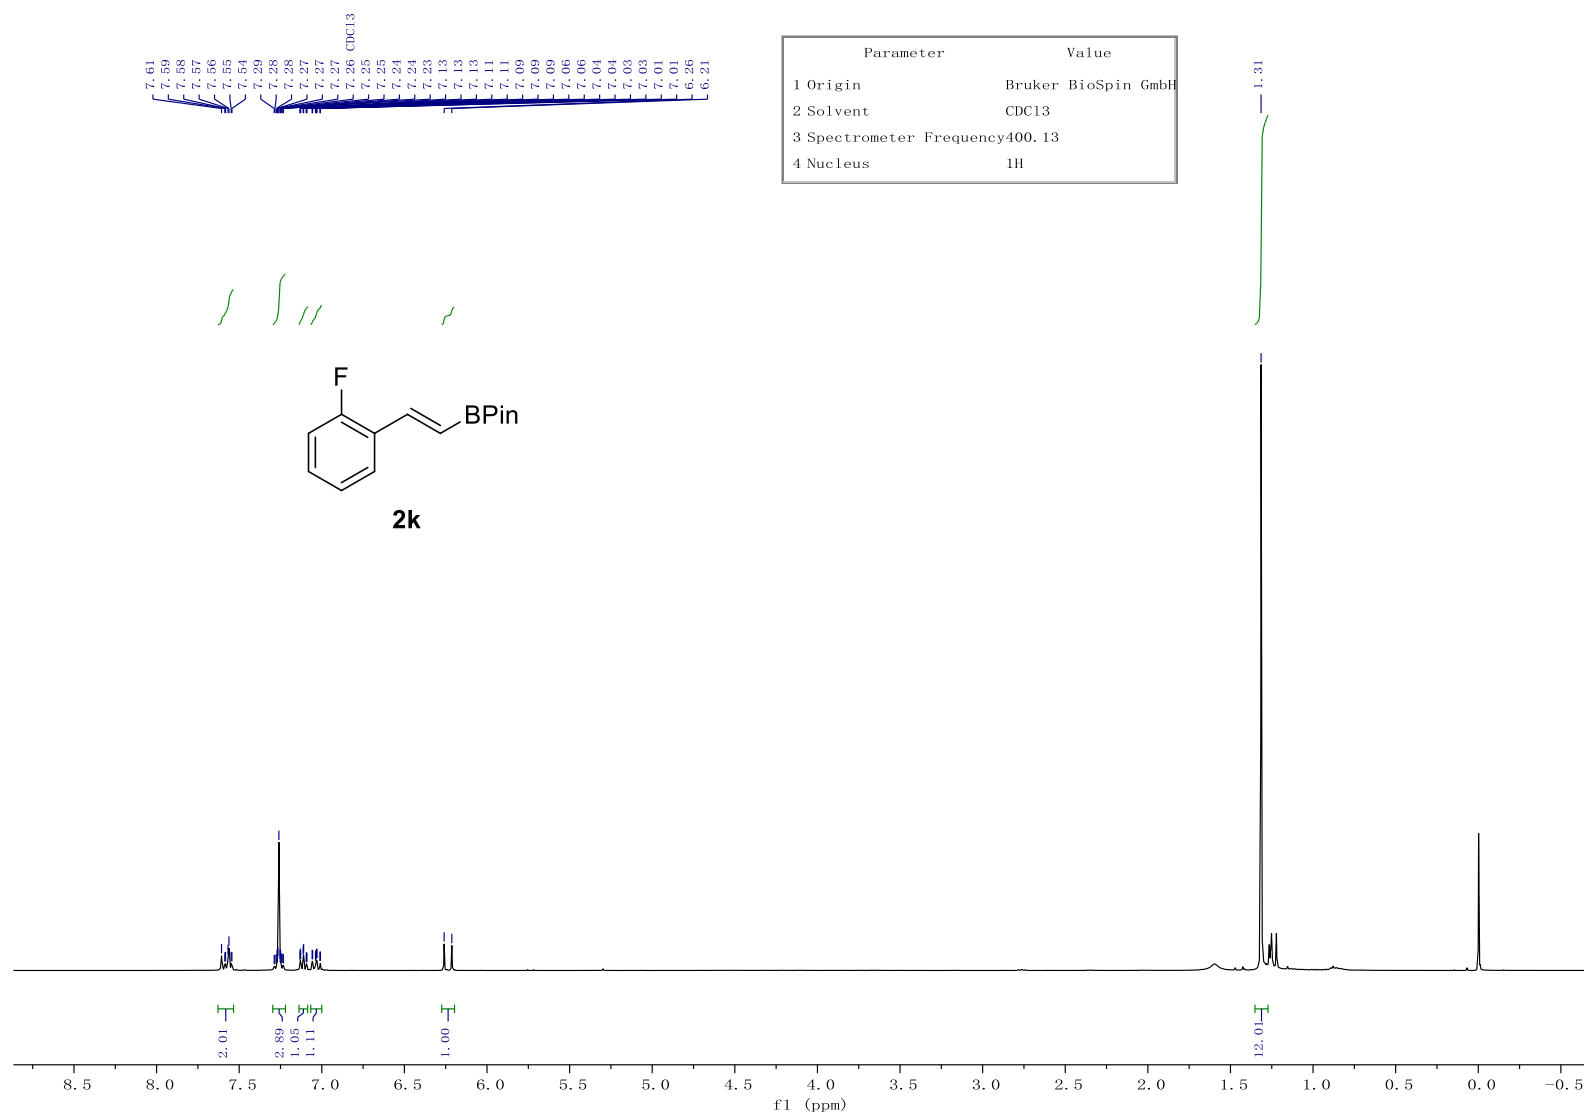

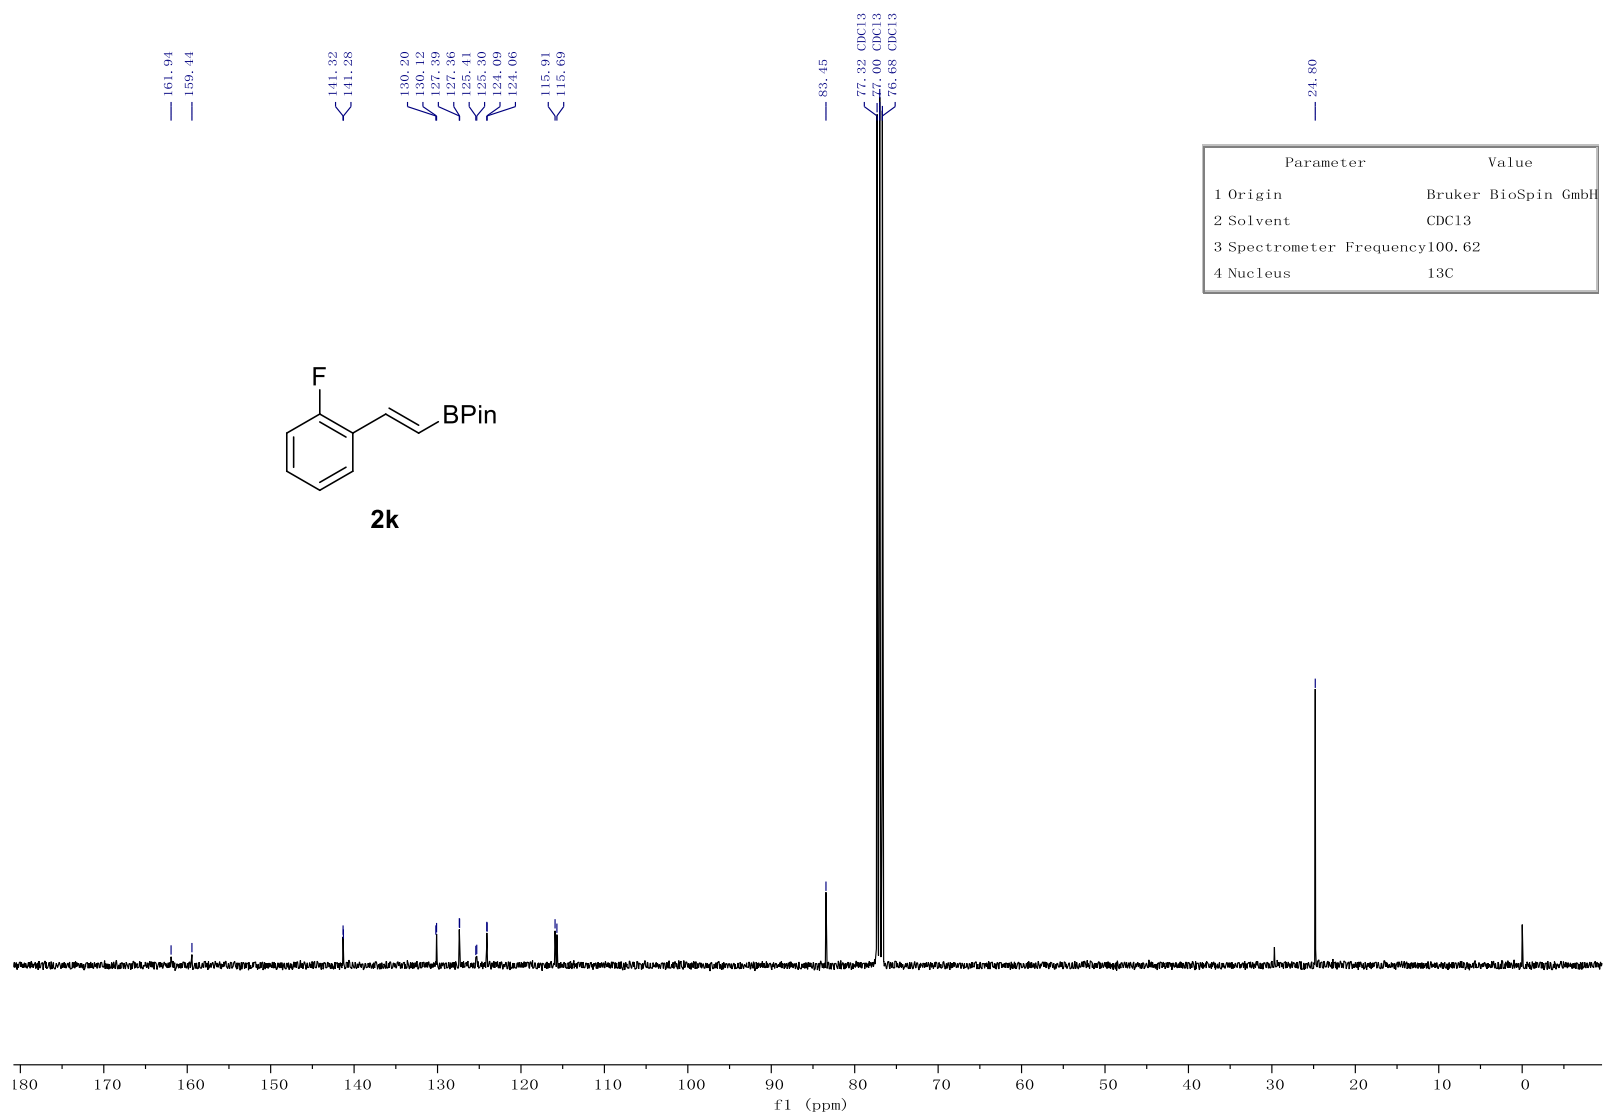

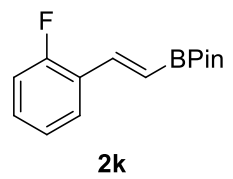

-117.67

| Parameter                | Value               |
|--------------------------|---------------------|
| 1 Origin                 | Bruker BioSpin GmbH |
| 2 Solvent                | CDC13               |
| 3 Spectrometer Frequency | 376.46              |
| 4 Nucleus                | <sup>19</sup> F     |

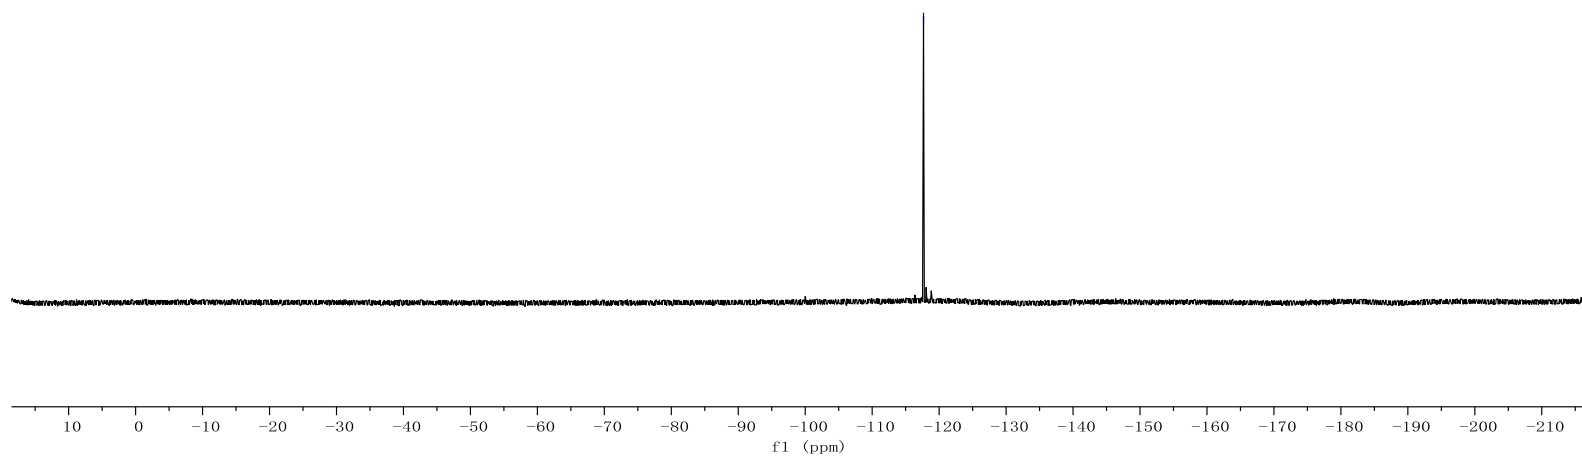

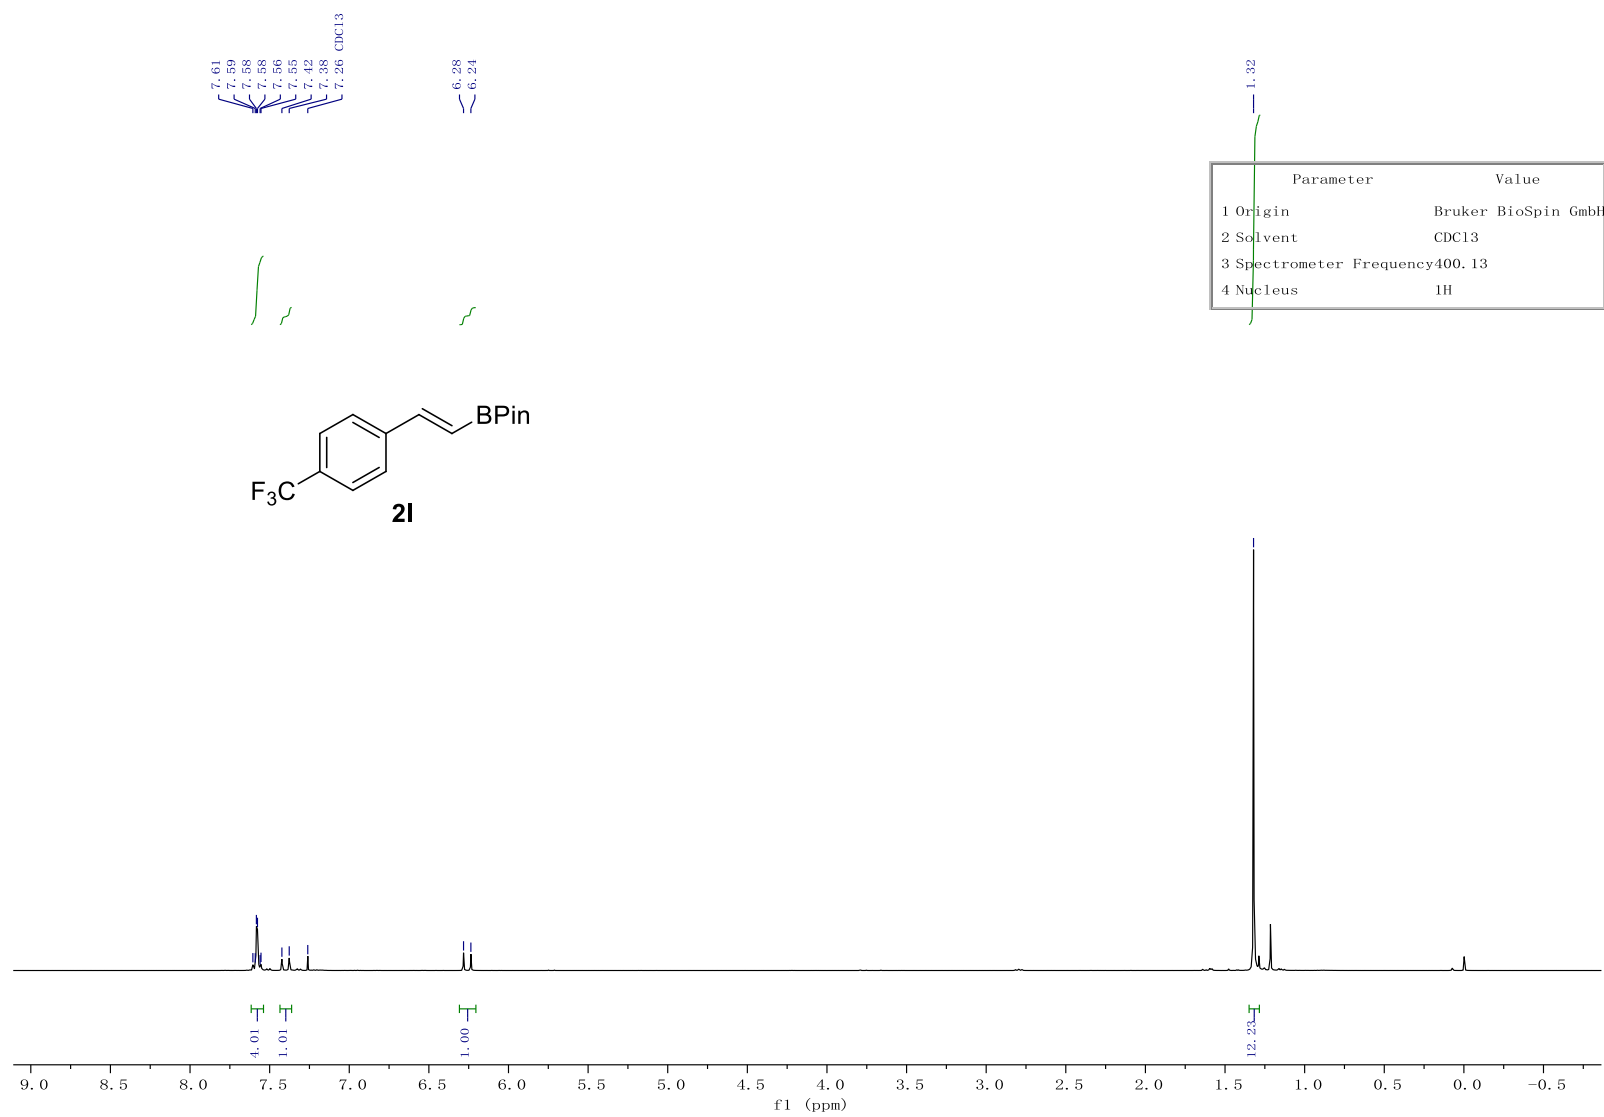

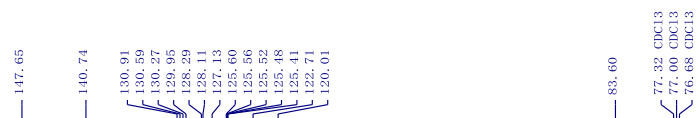

| Parameter                | Value               |
|--------------------------|---------------------|
| 1 Origin                 | Bruker BioSpin GmbH |
| 2 Solvent                | CDCl3               |
| 3 Spectrometer Frequency | 100.62              |
| 4 Nucleus                | 13C                 |

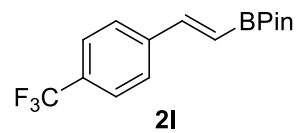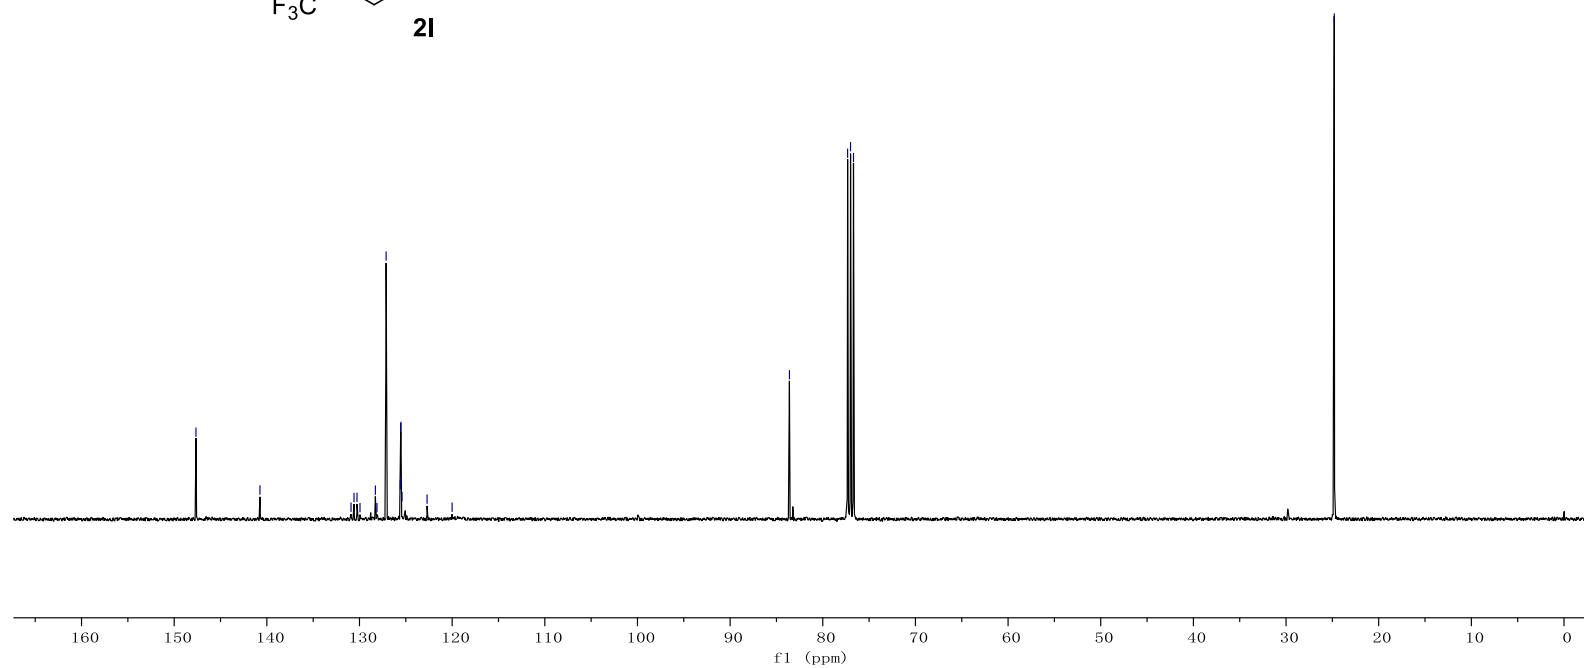

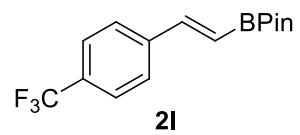

-62.63

| Parameter                | Value               |
|--------------------------|---------------------|
| 1 Origin                 | Bruker BioSpin GmbH |
| 2 Solvent                | CDCl <sub>3</sub>   |
| 3 Spectrometer Frequency | 376.46              |
| 4 Nucleus                | <sup>19</sup> F     |

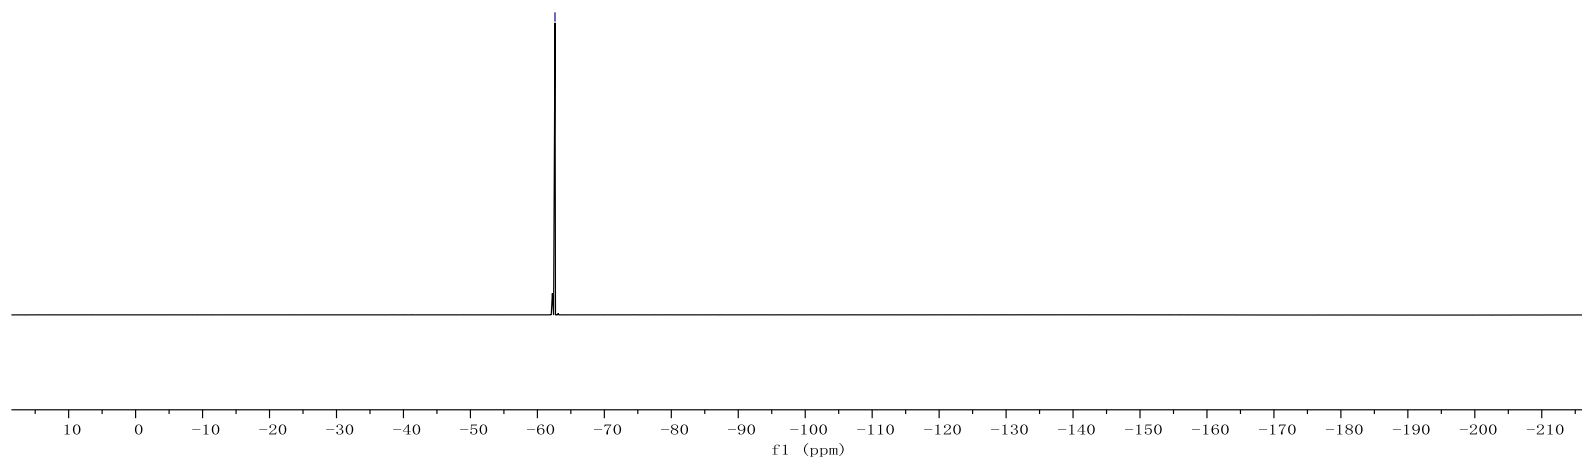

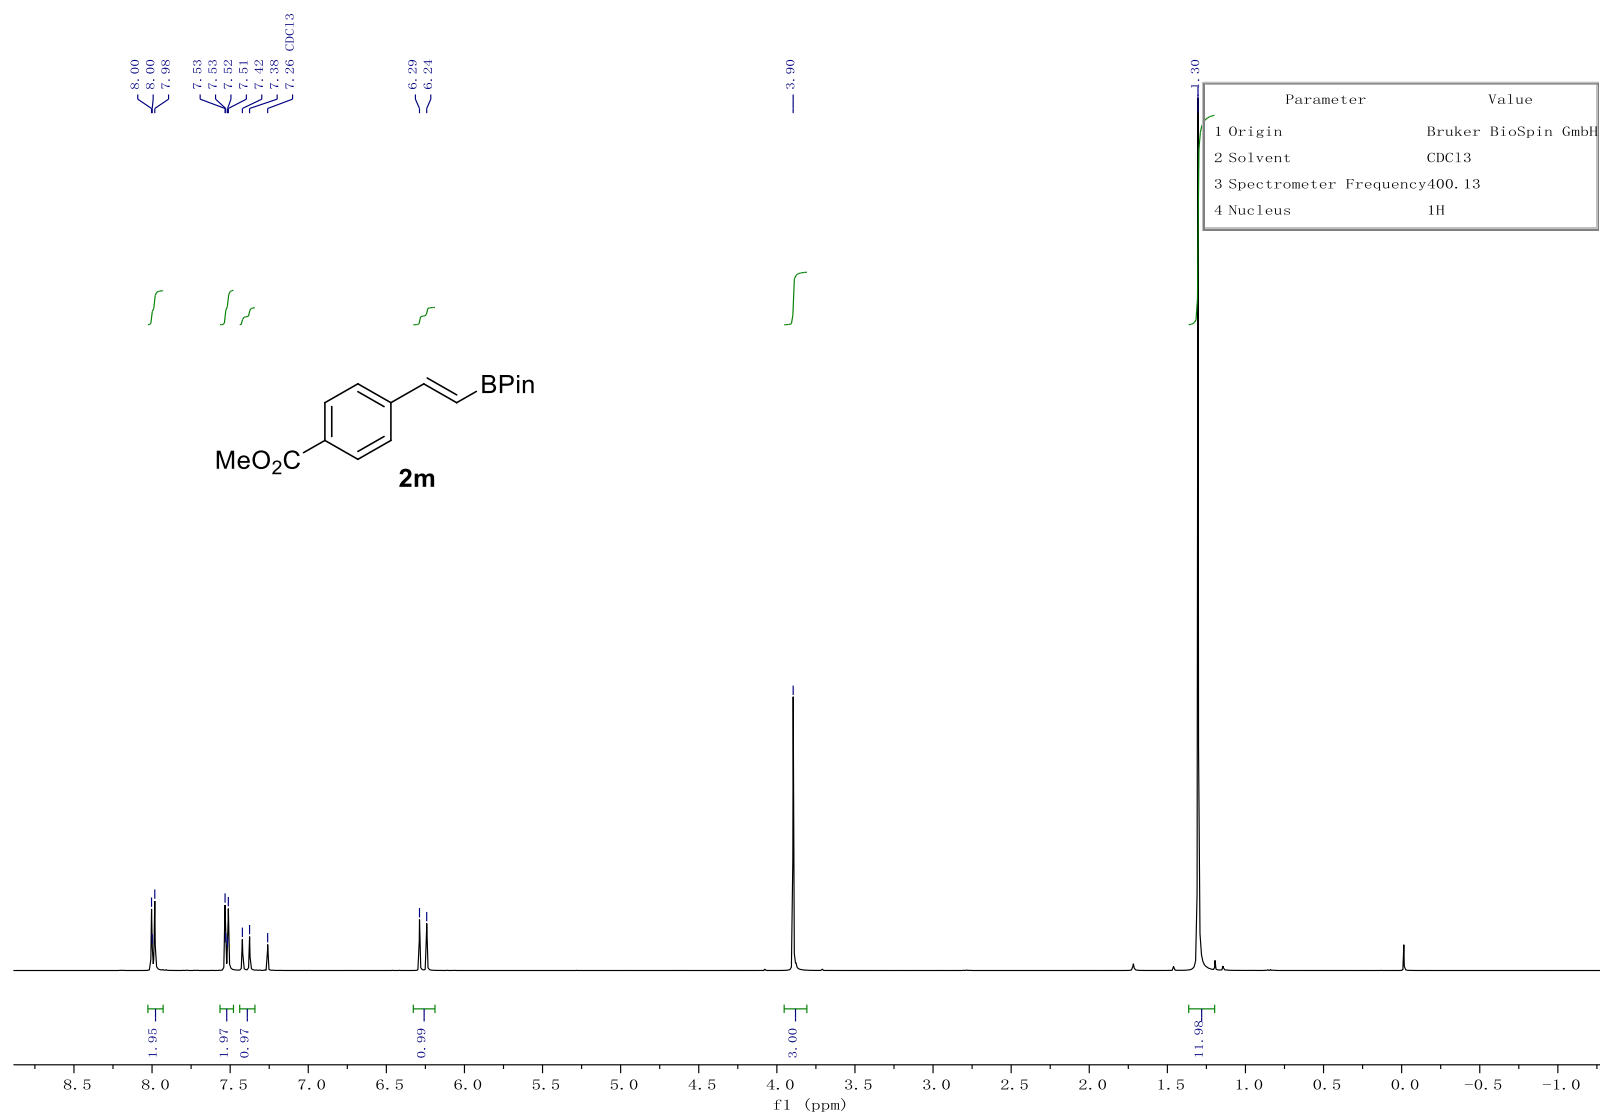



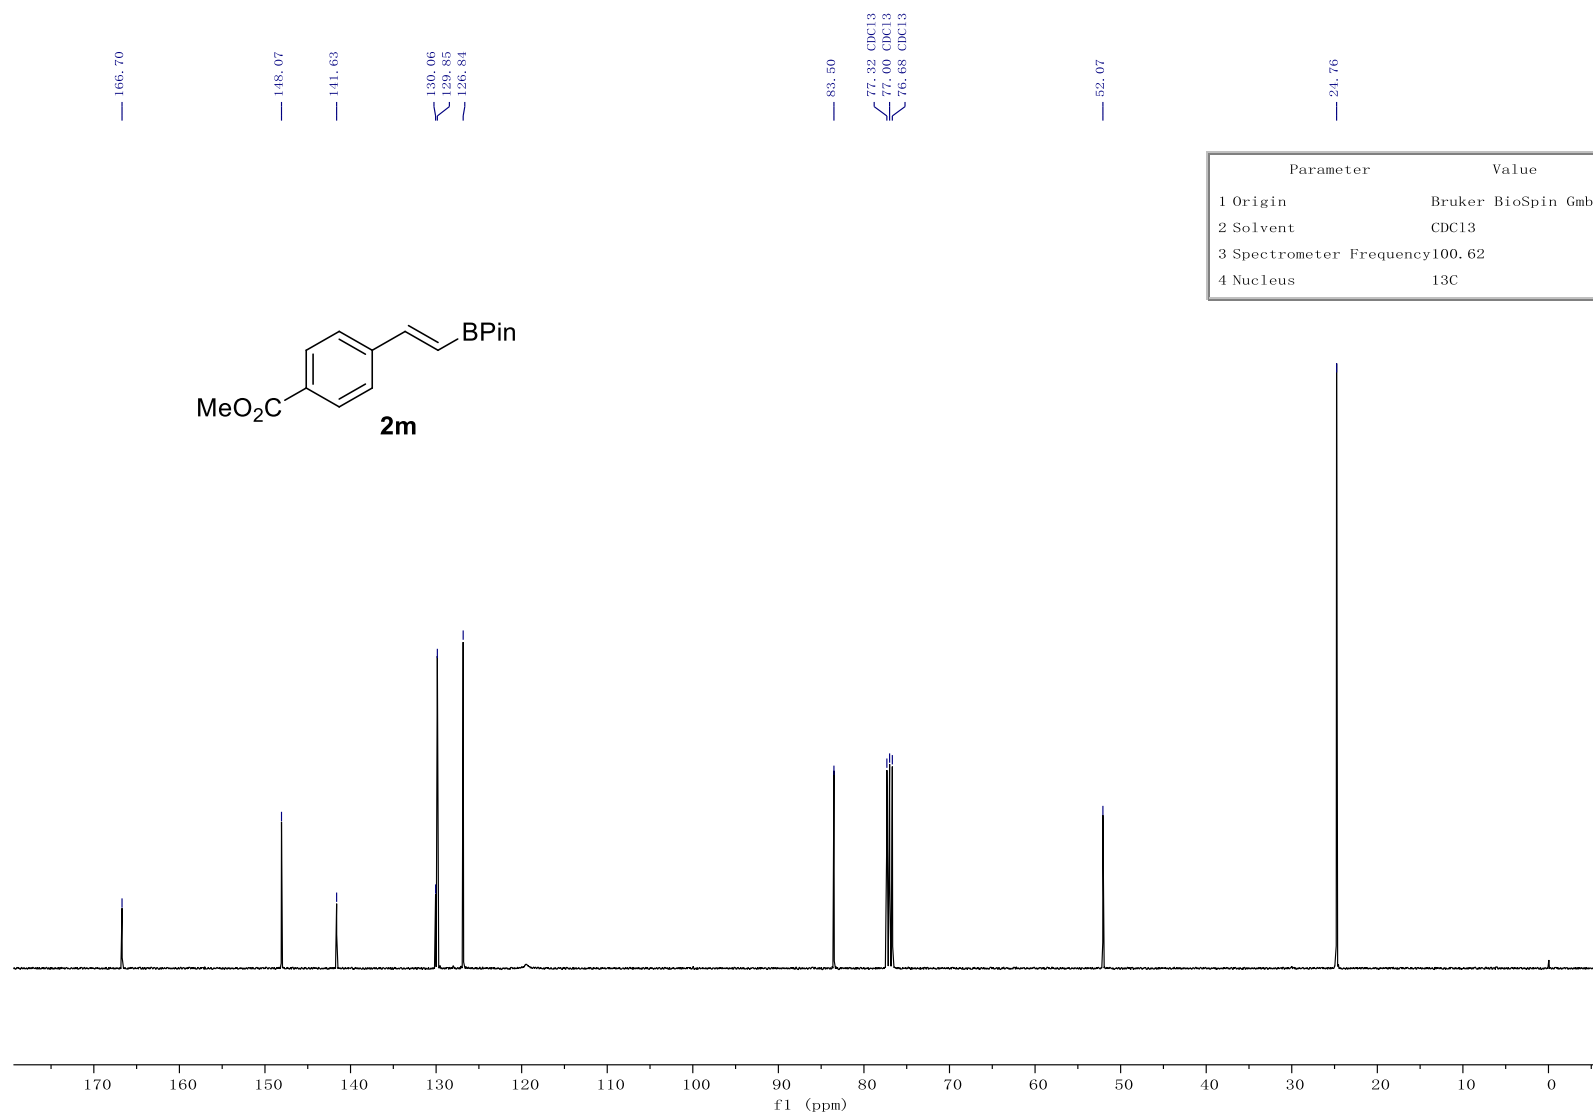

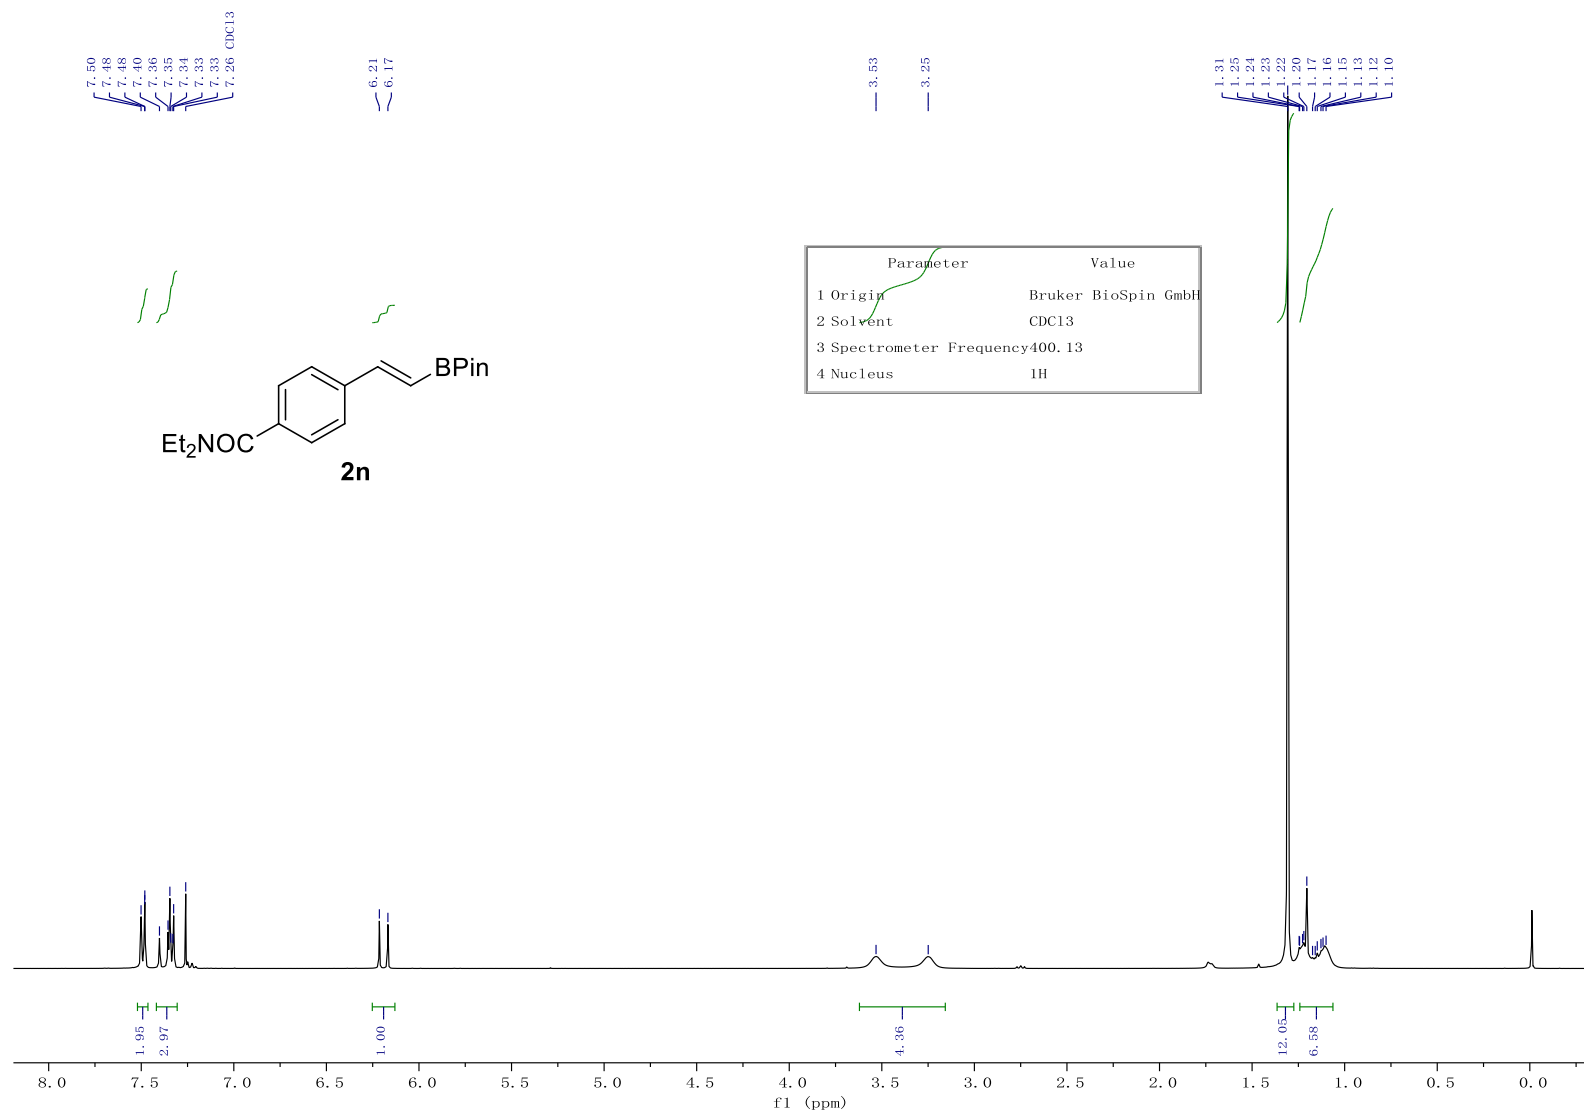

170.87

148.48

138.18

137.46

126.99

126.65

83.43

77.32 CDC13

77.00 CDC13

76.68 CDC13

43.24

39.22

24.78

14.20

12.88

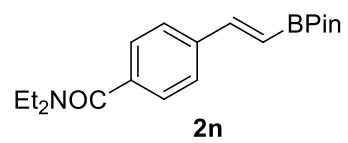

| Parameter                | Value               |
|--------------------------|---------------------|
| 1 Origin                 | Bruker BioSpin GmbH |
| 2 Solvent                | CDC13               |
| 3 Spectrometer Frequency | 100.62              |
| 4 Nucleus                | 13C                 |

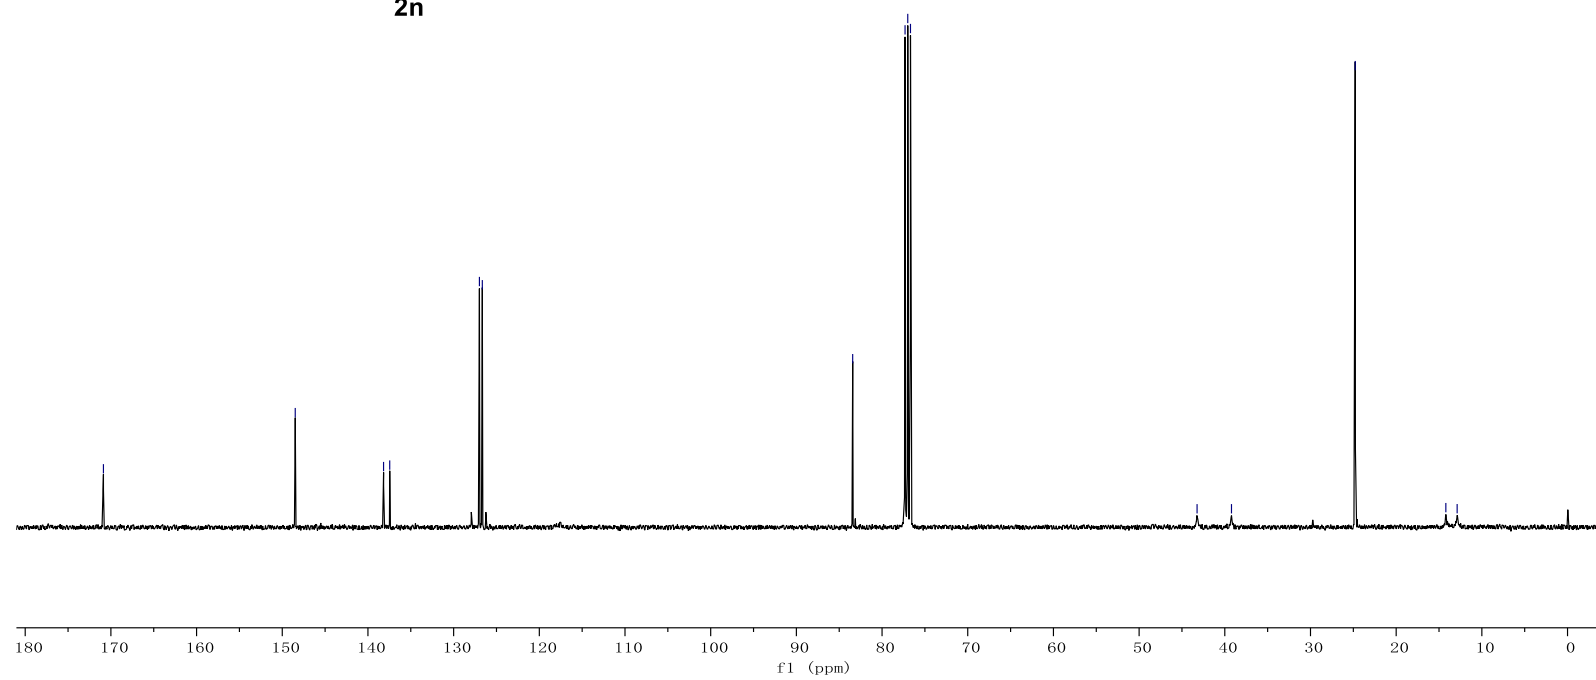

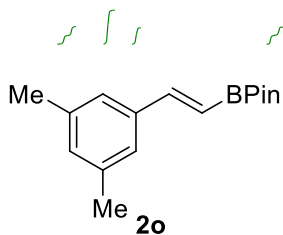

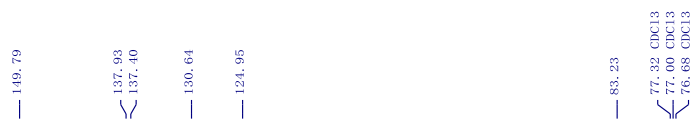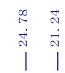

| Parameter                | Value               |
|--------------------------|---------------------|
| 1 Origin                 | Bruker BioSpin GmbH |
| 2 Solvent                | CDC13               |
| 3 Spectrometer Frequency | 100.62              |
| 4 Nucleus                | <sup>13</sup> C     |

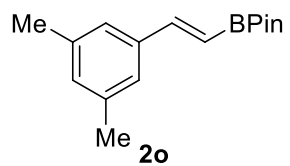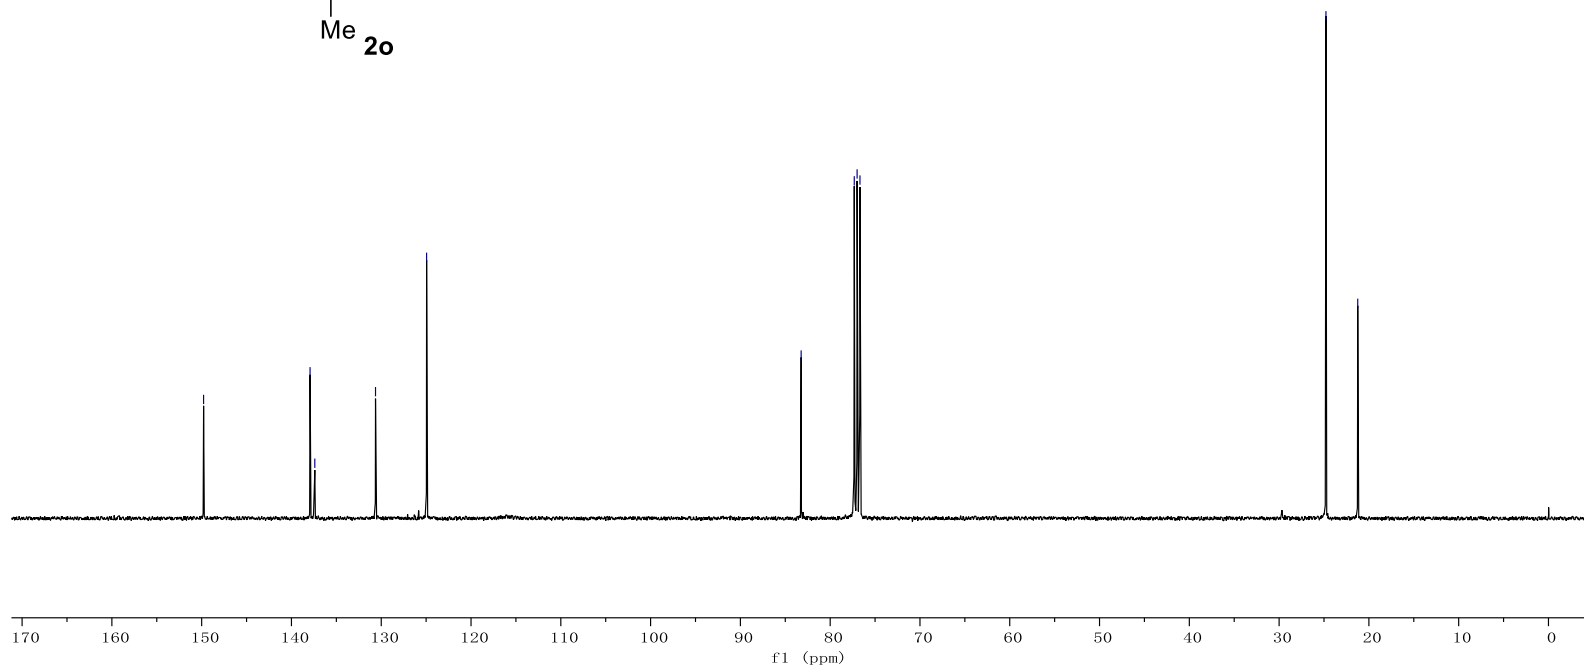

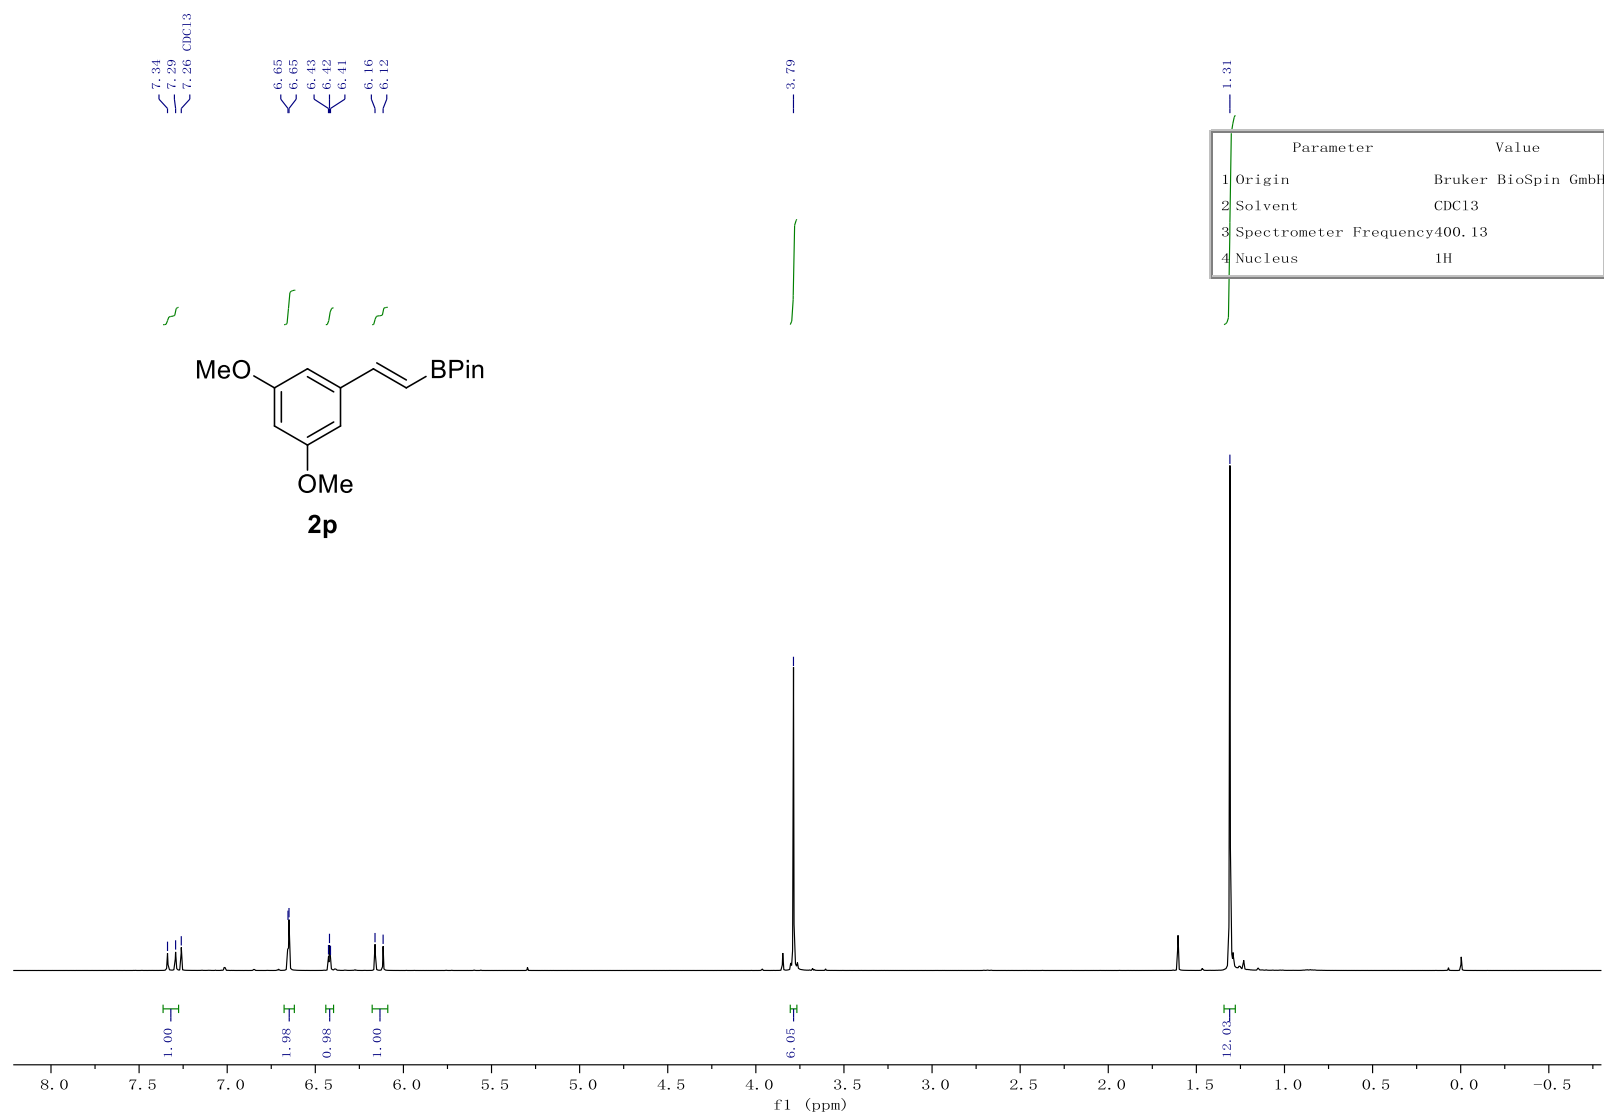

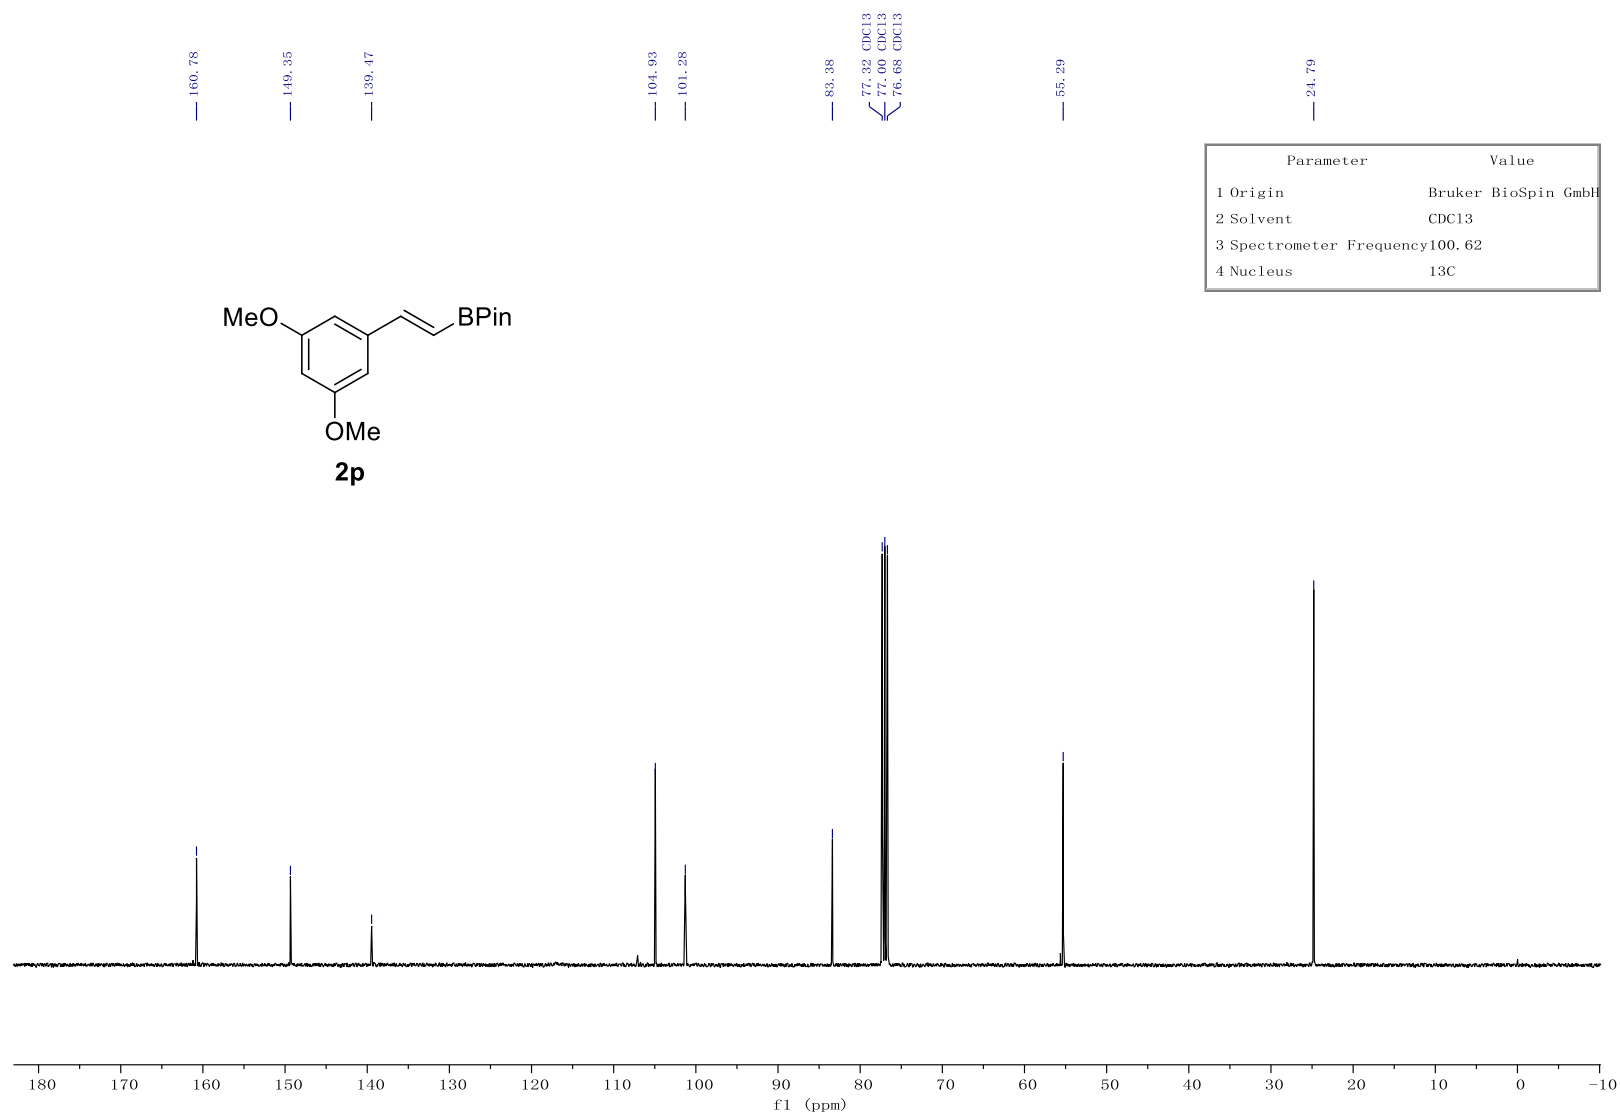

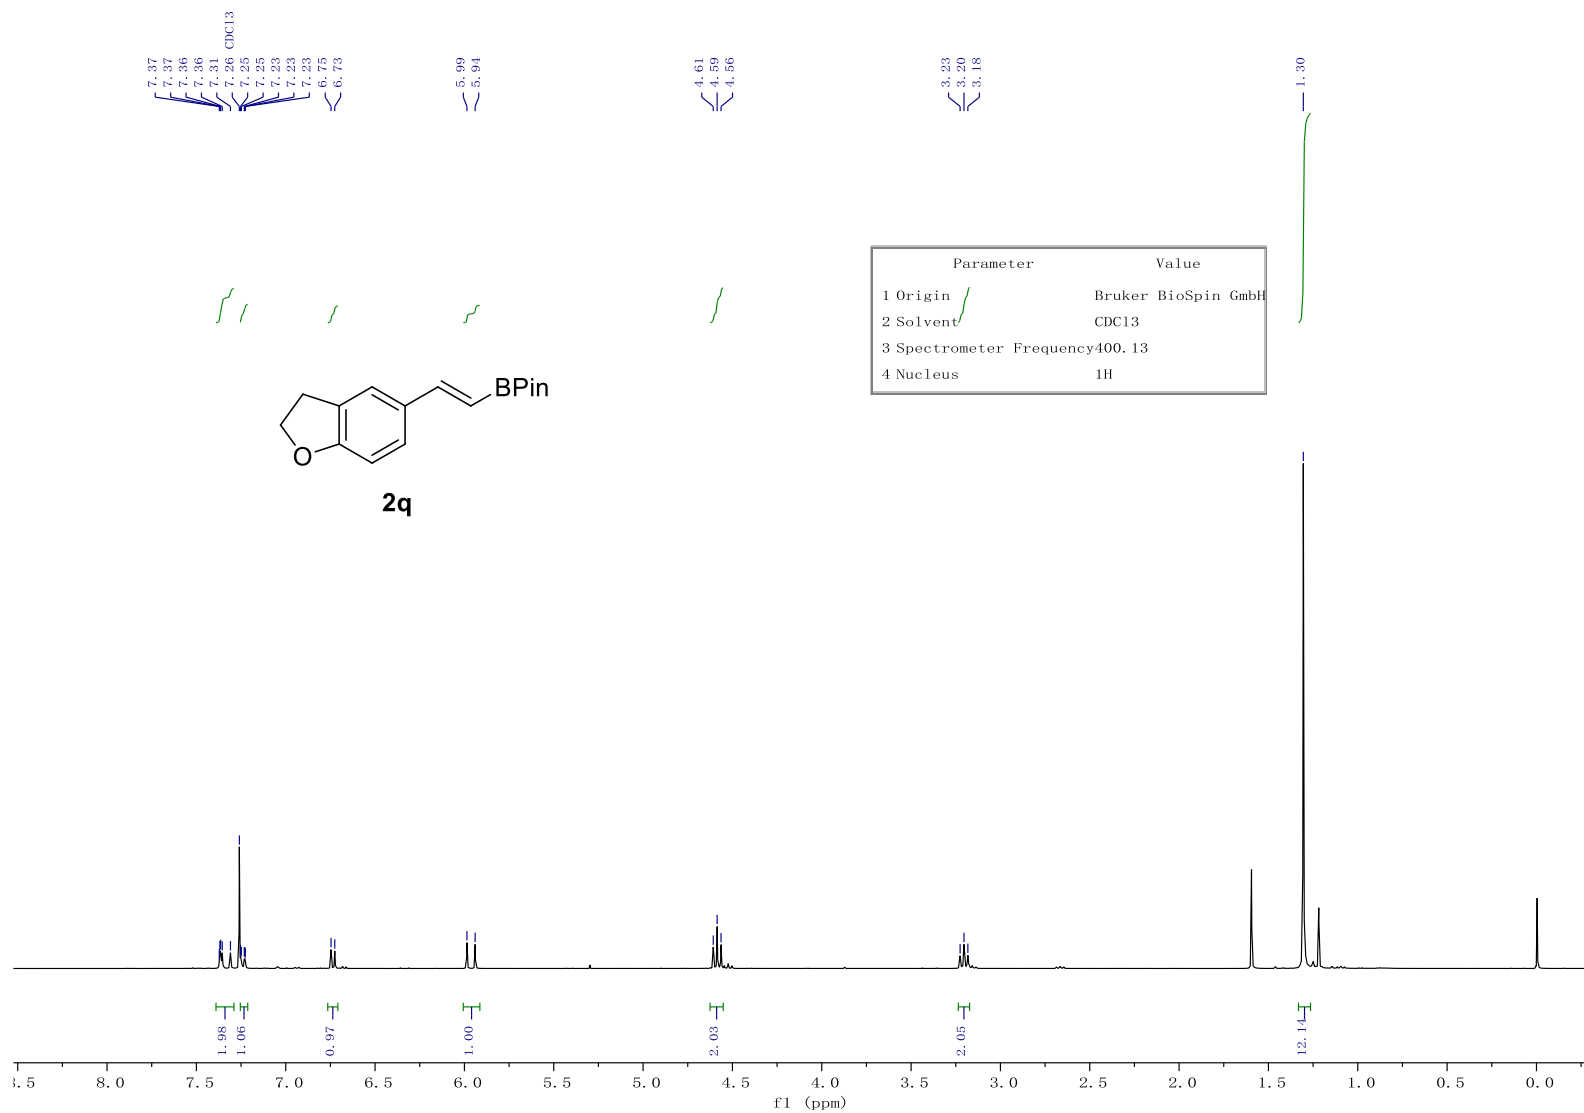



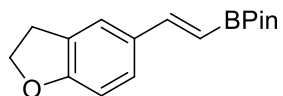

**2q**

| Parameter                | Value               |
|--------------------------|---------------------|
| 1 Origin                 | Bruker BioSpin GmbH |
| 2 Solvent                | CDC13               |
| 3 Spectrometer Frequency | 100.62              |
| 4 Nucleus                | <sup>13</sup> C     |

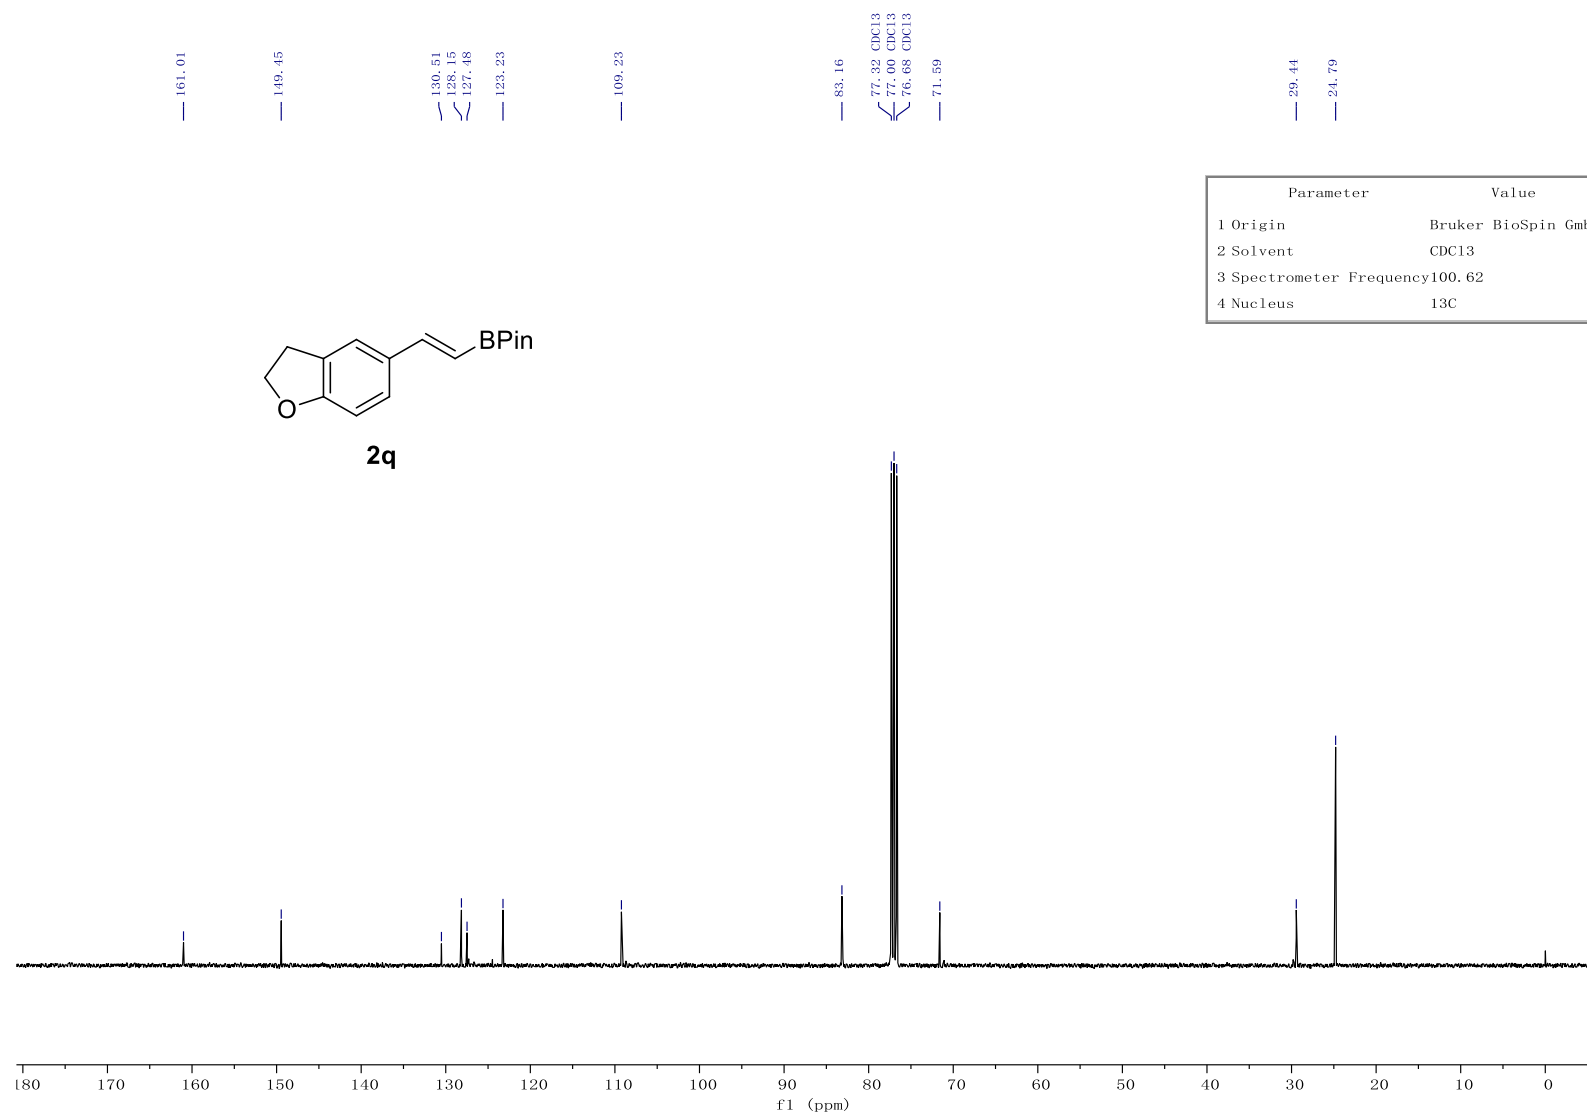

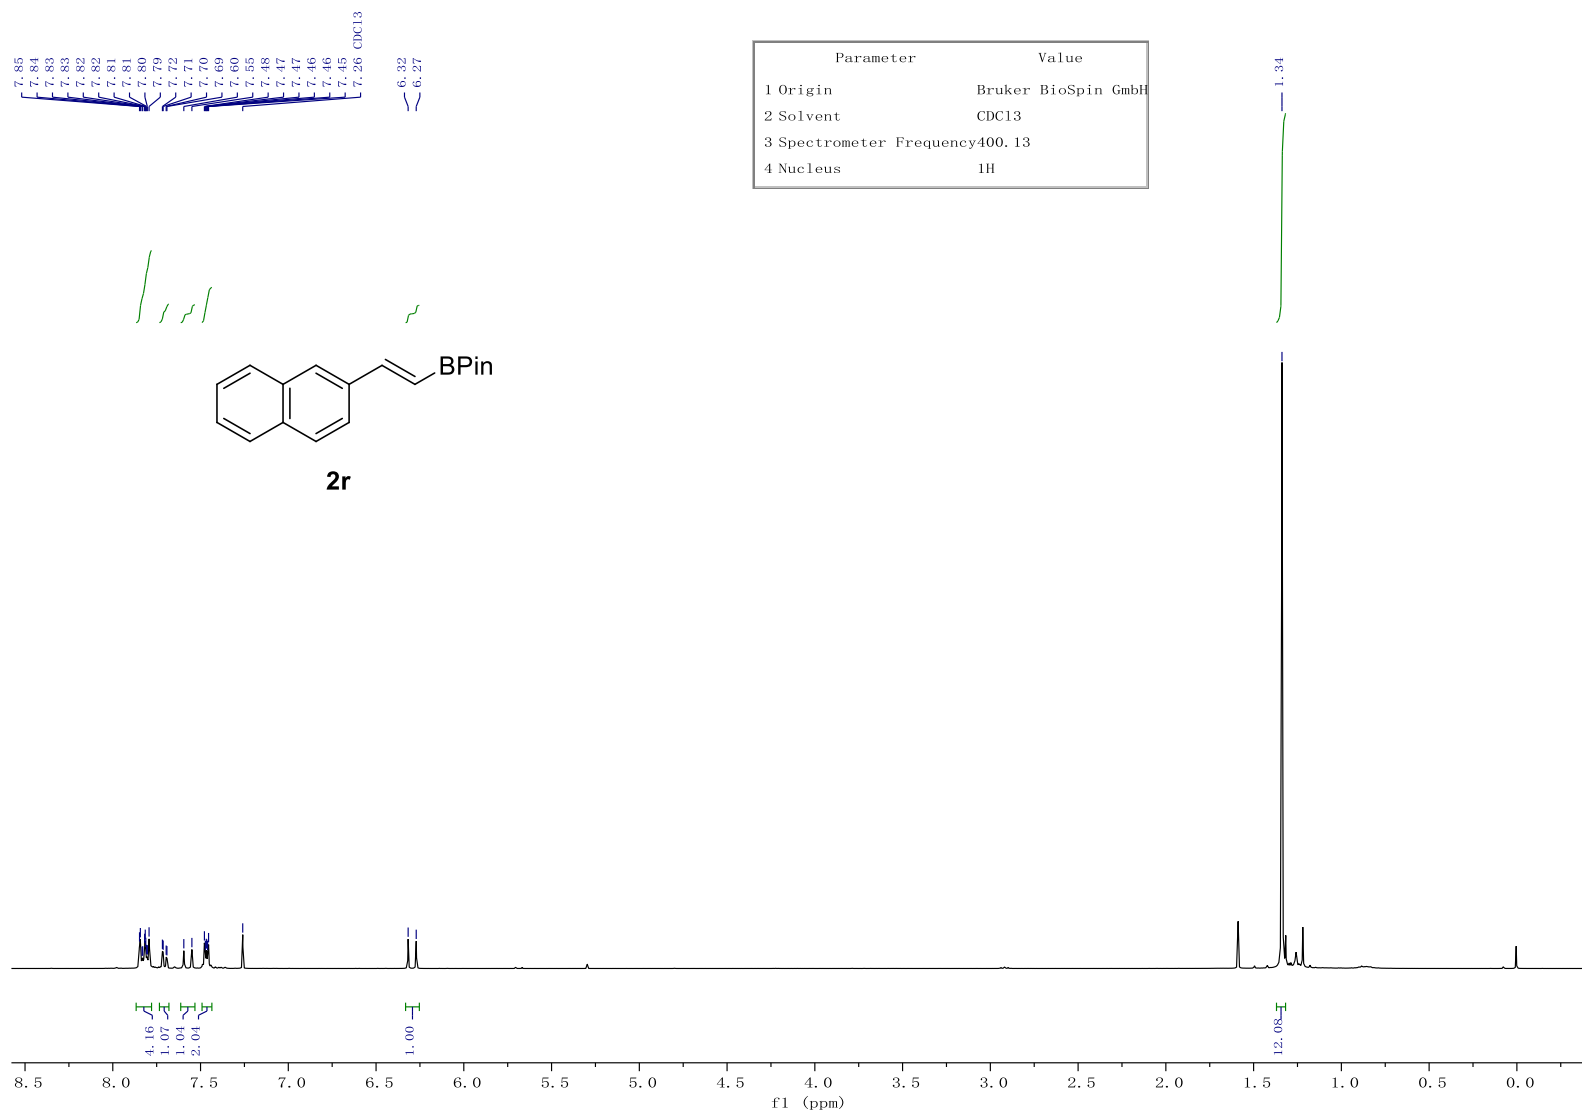

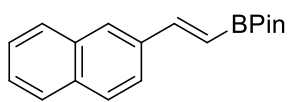

**2r**

149.48

134.94  
133.69  
133.40  
128.39  
128.22  
128.01  
127.66  
126.38  
126.28  
125.35

83.37

77.32 CDC13  
77.00 CDC13  
76.68 CDC13

24.82

| Parameter                | Value               |
|--------------------------|---------------------|
| 1 Origin                 | Bruker BioSpin GmbH |
| 2 Solvent                | CDC13               |
| 3 Spectrometer Frequency | 100.62              |
| 4 Nucleus                | <sup>13</sup> C     |

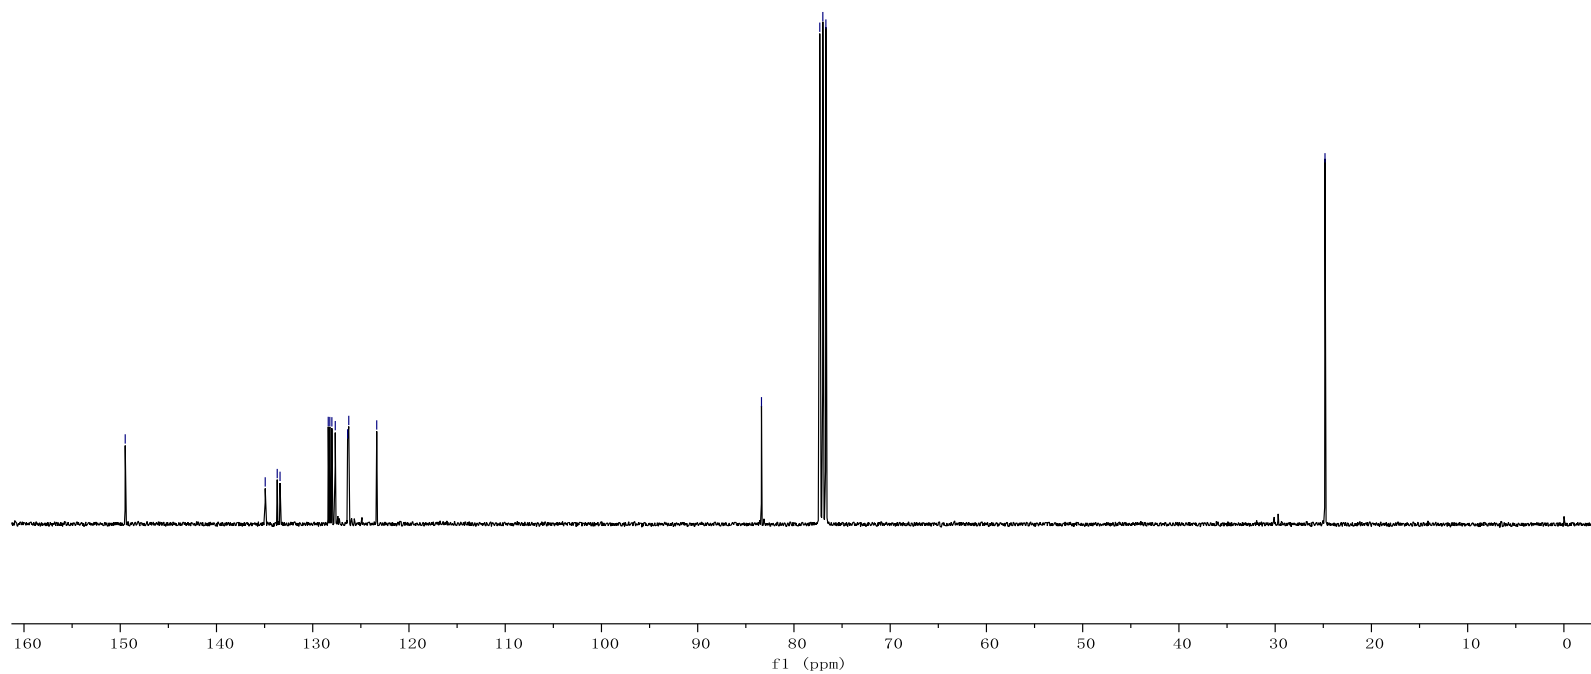



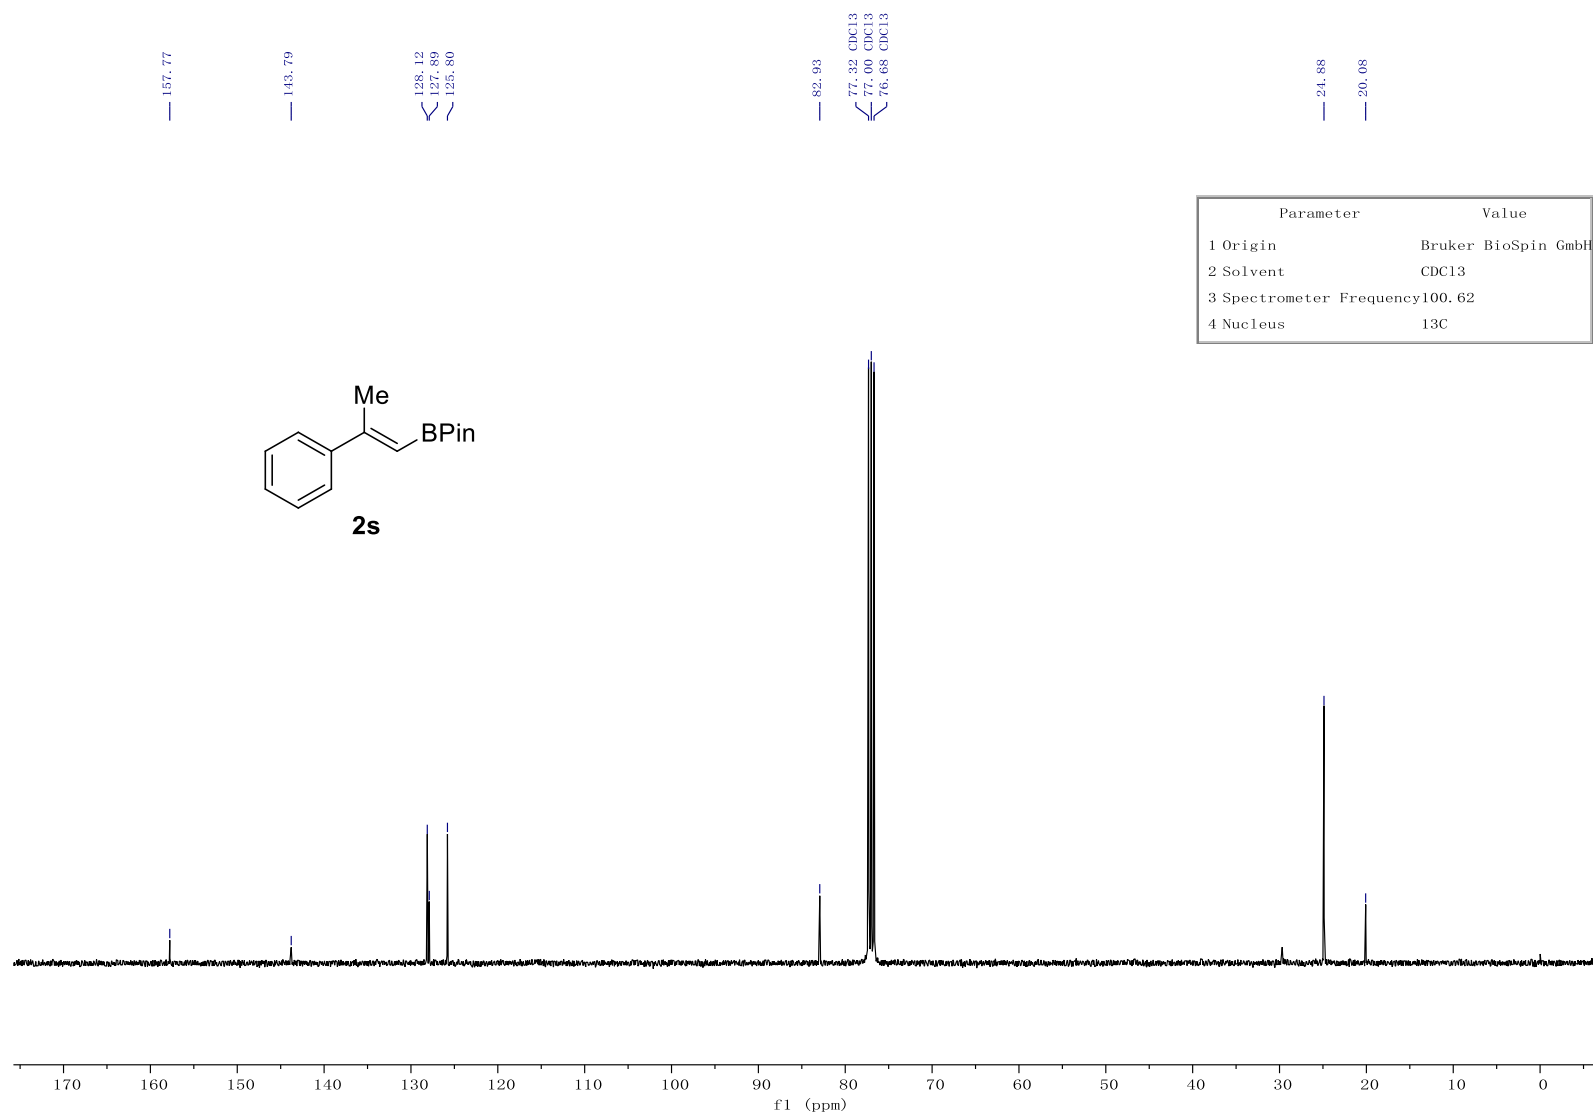

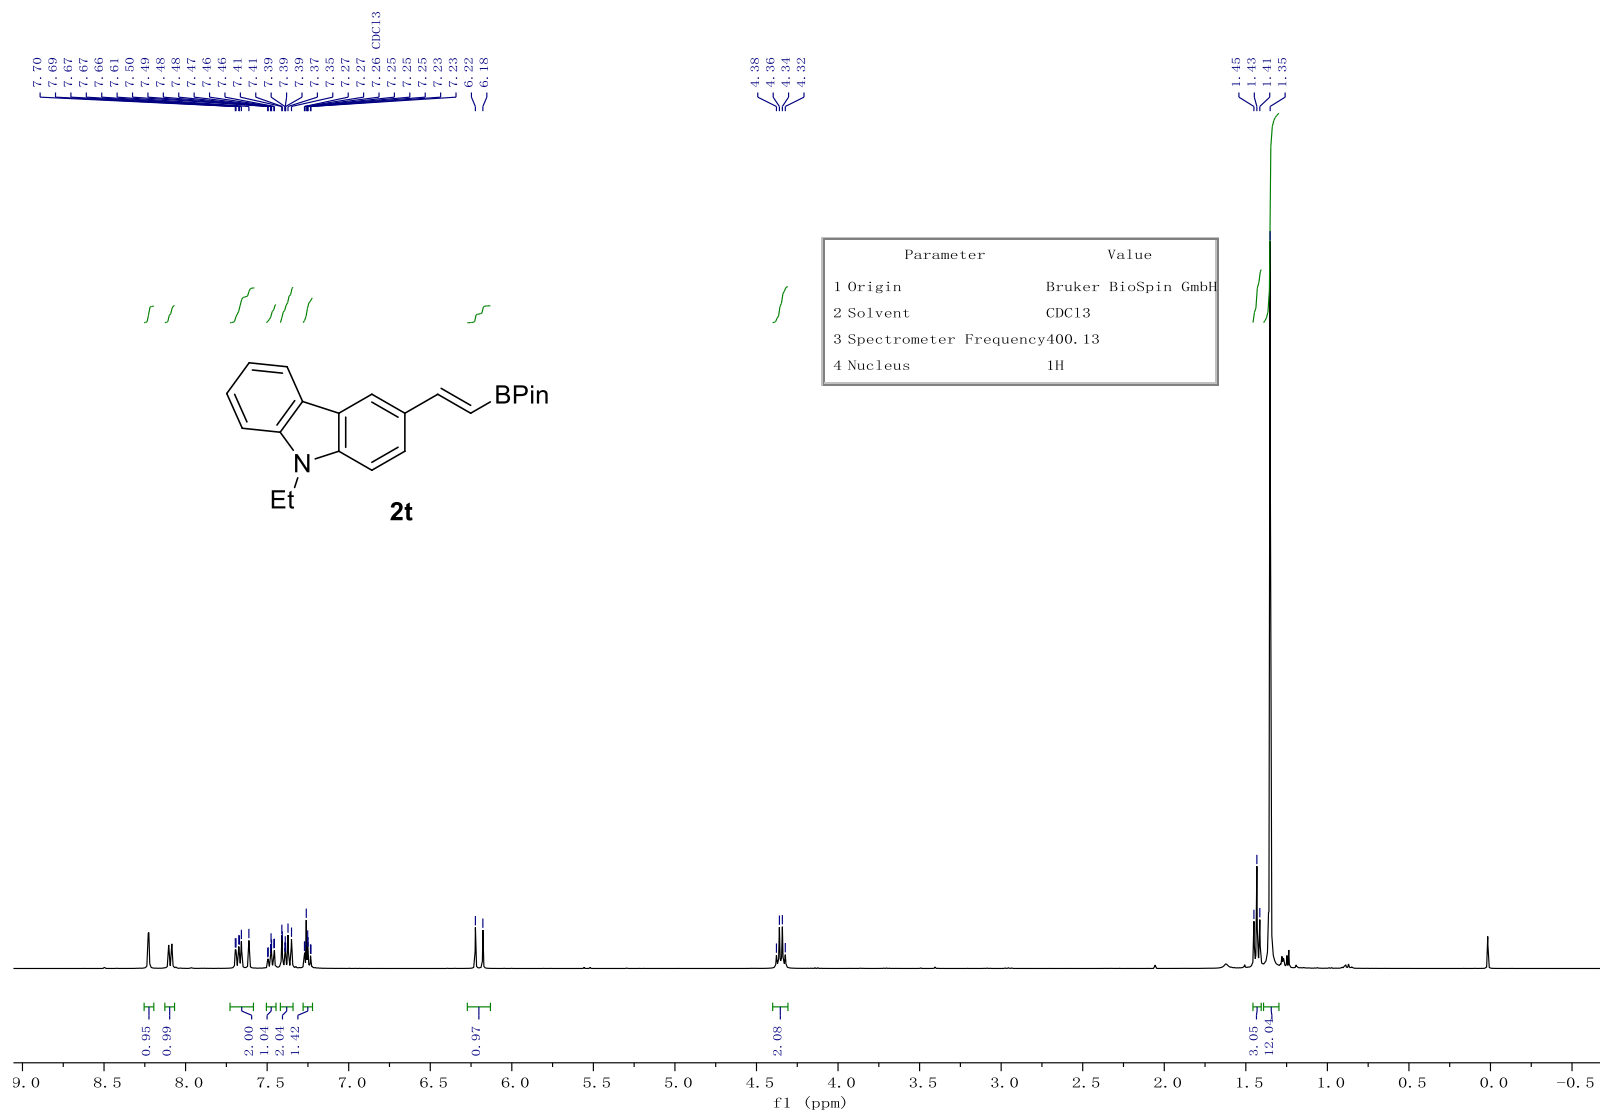

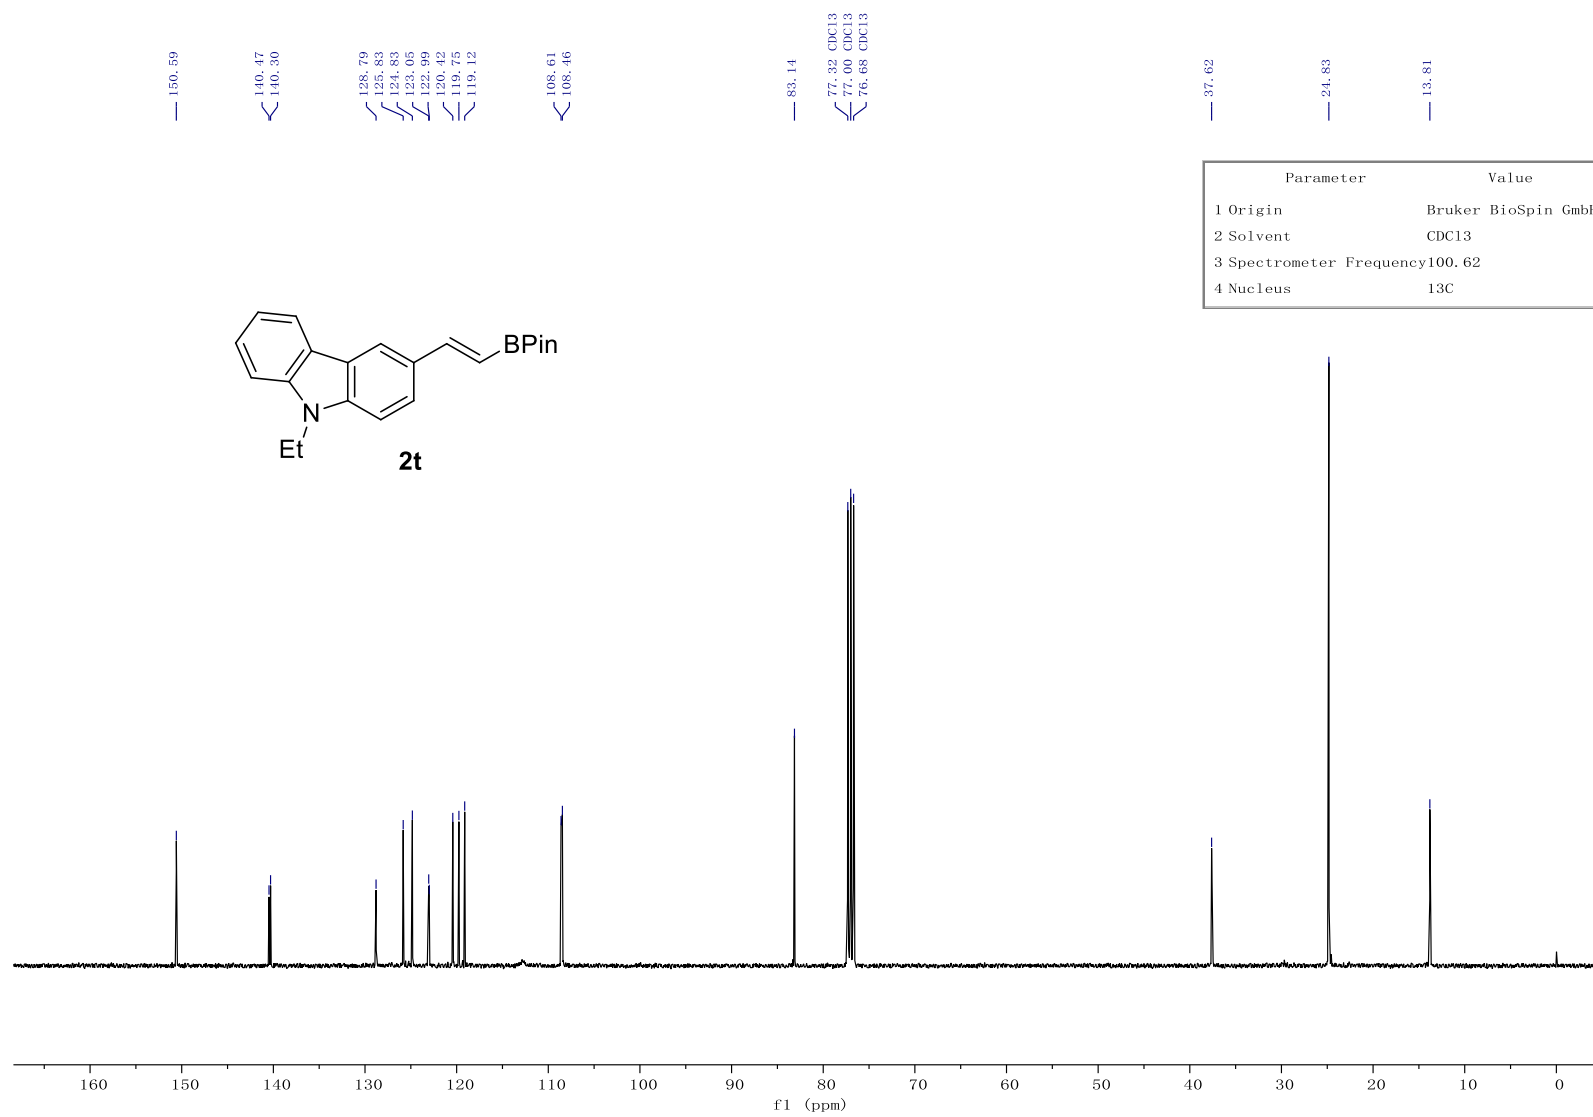

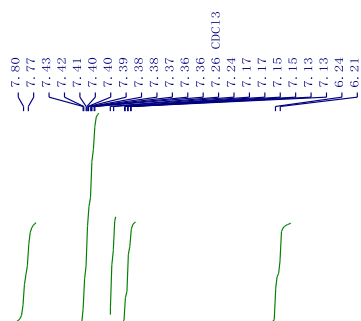

| Parameter                | Value               |
|--------------------------|---------------------|
| 1 Origin                 | Bruker BioSpin GmbH |
| 2 Solvent                | CDCl3               |
| 3 Spectrometer Frequency | 400.13              |
| 4 Nucleus                | <sup>1</sup> H      |

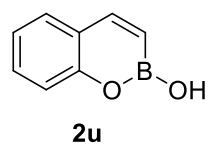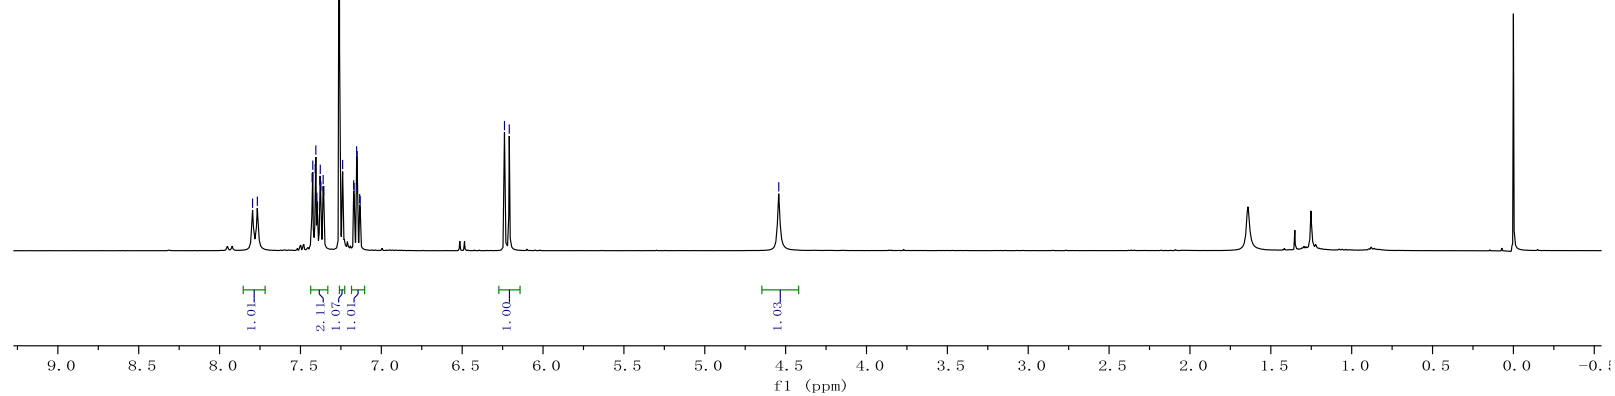



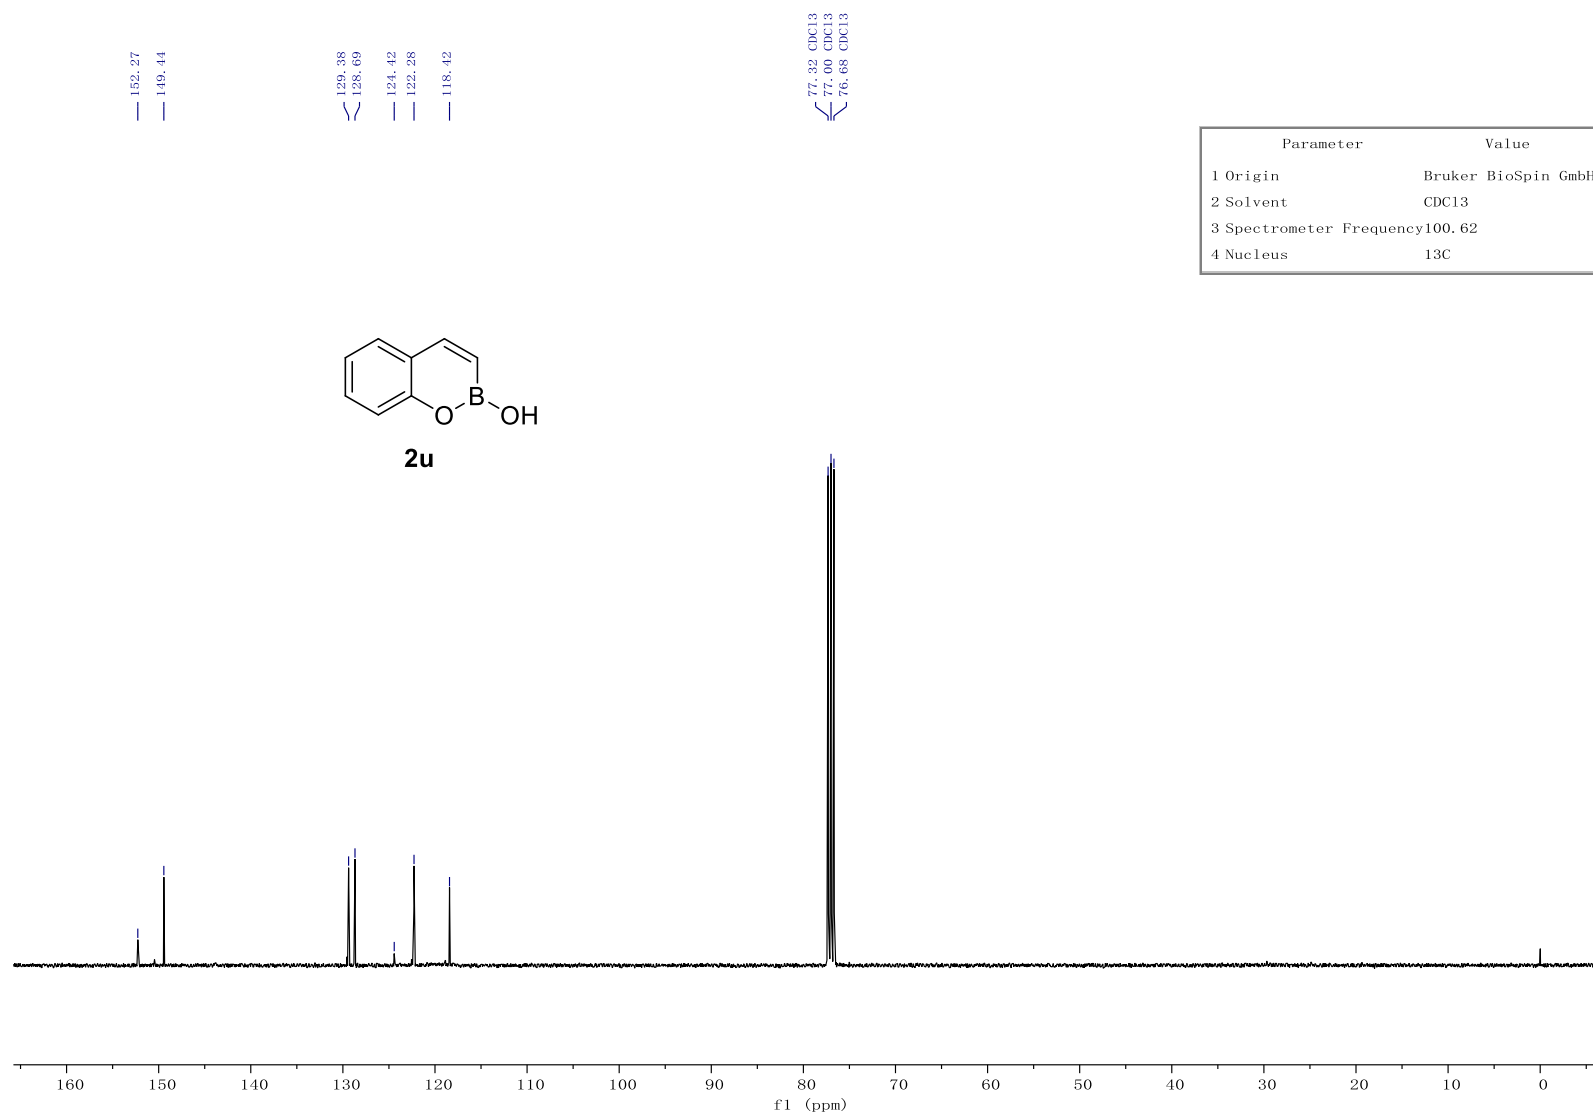

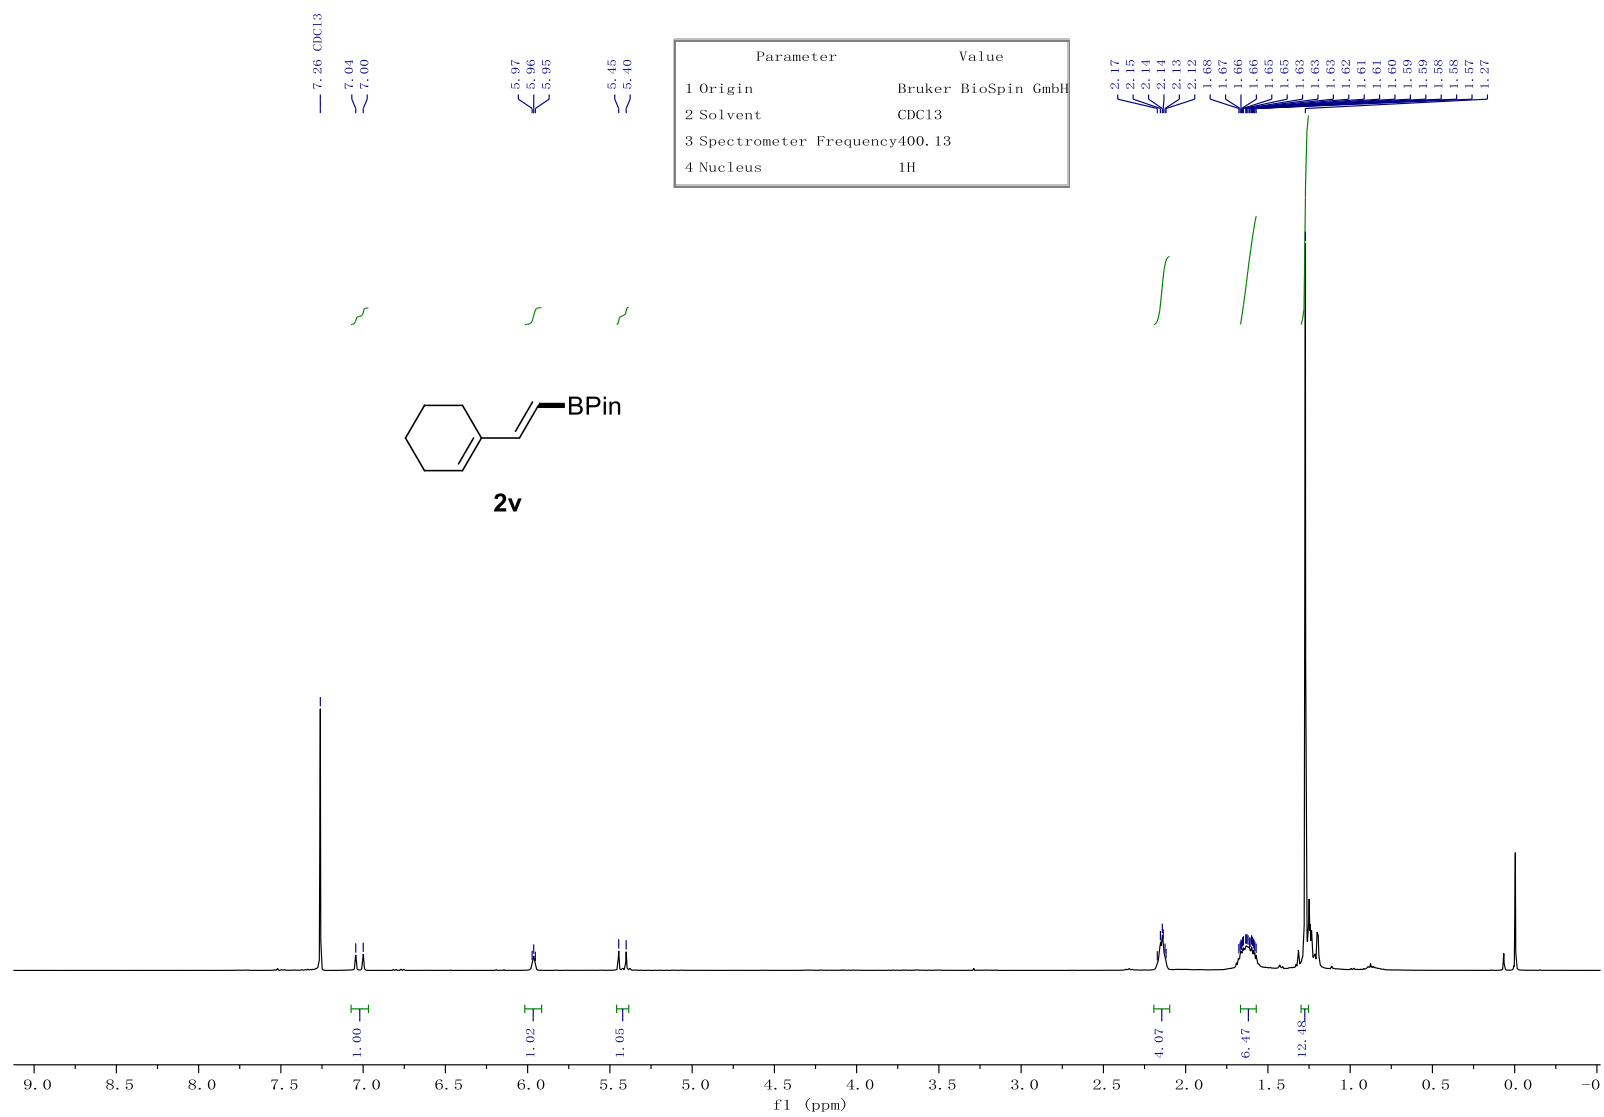

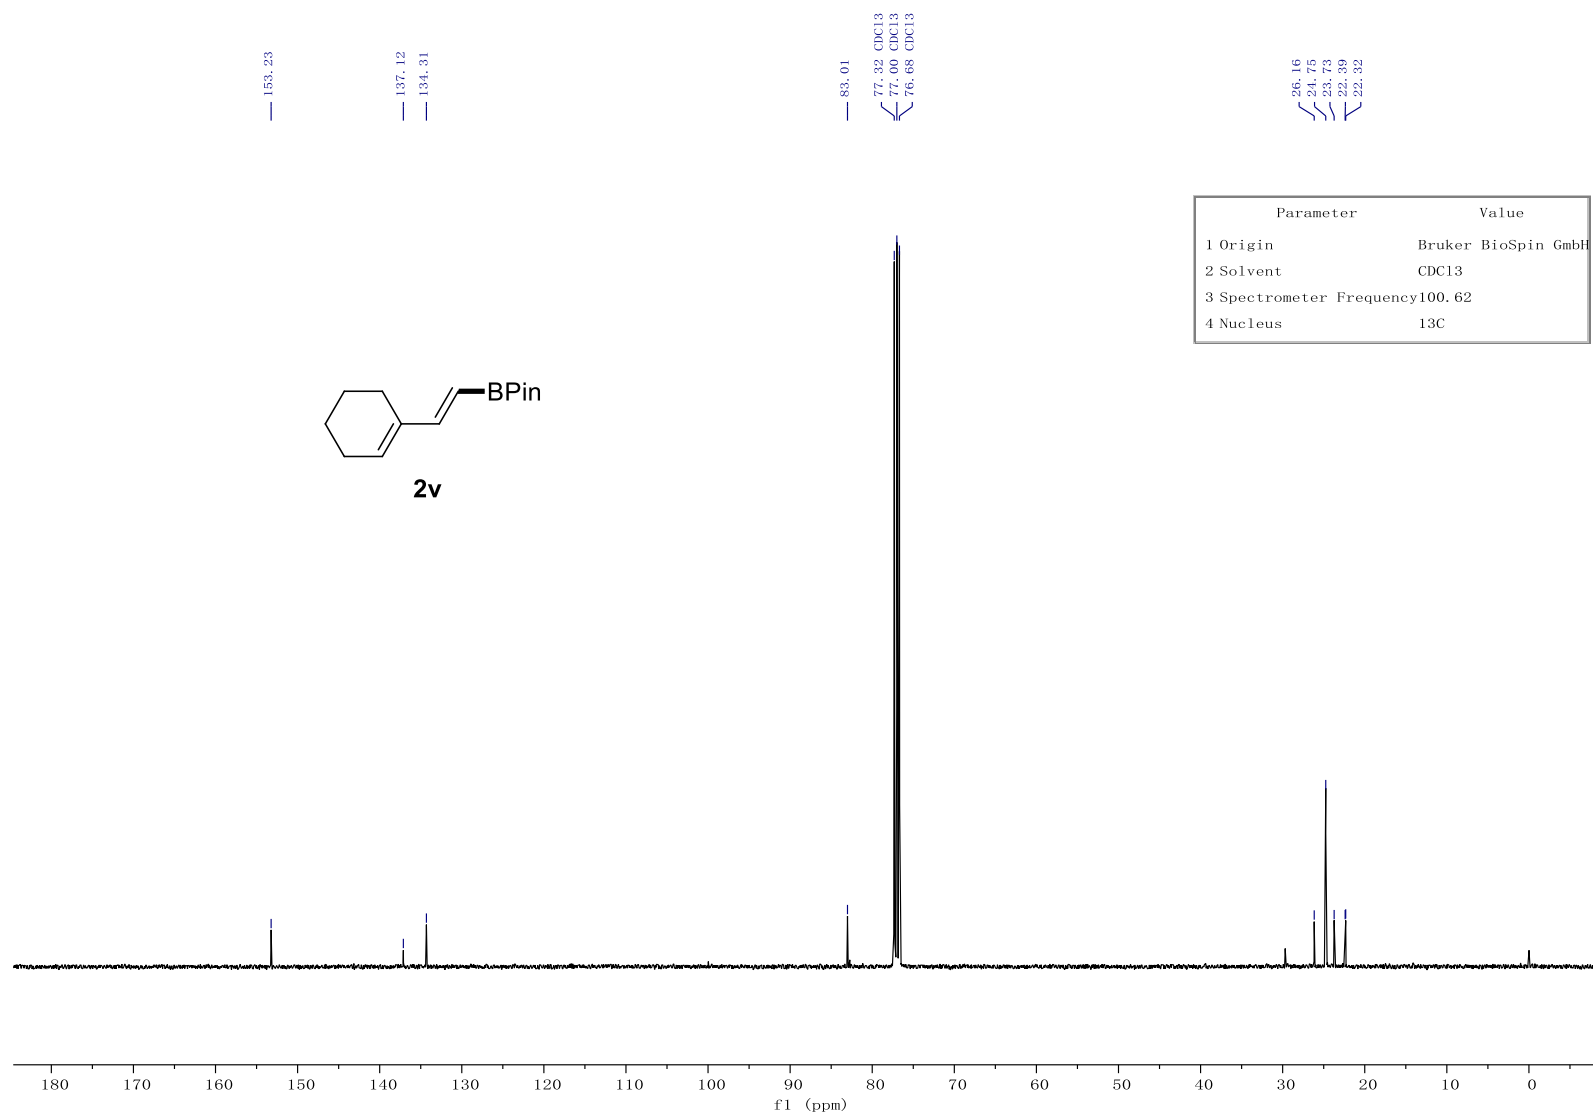

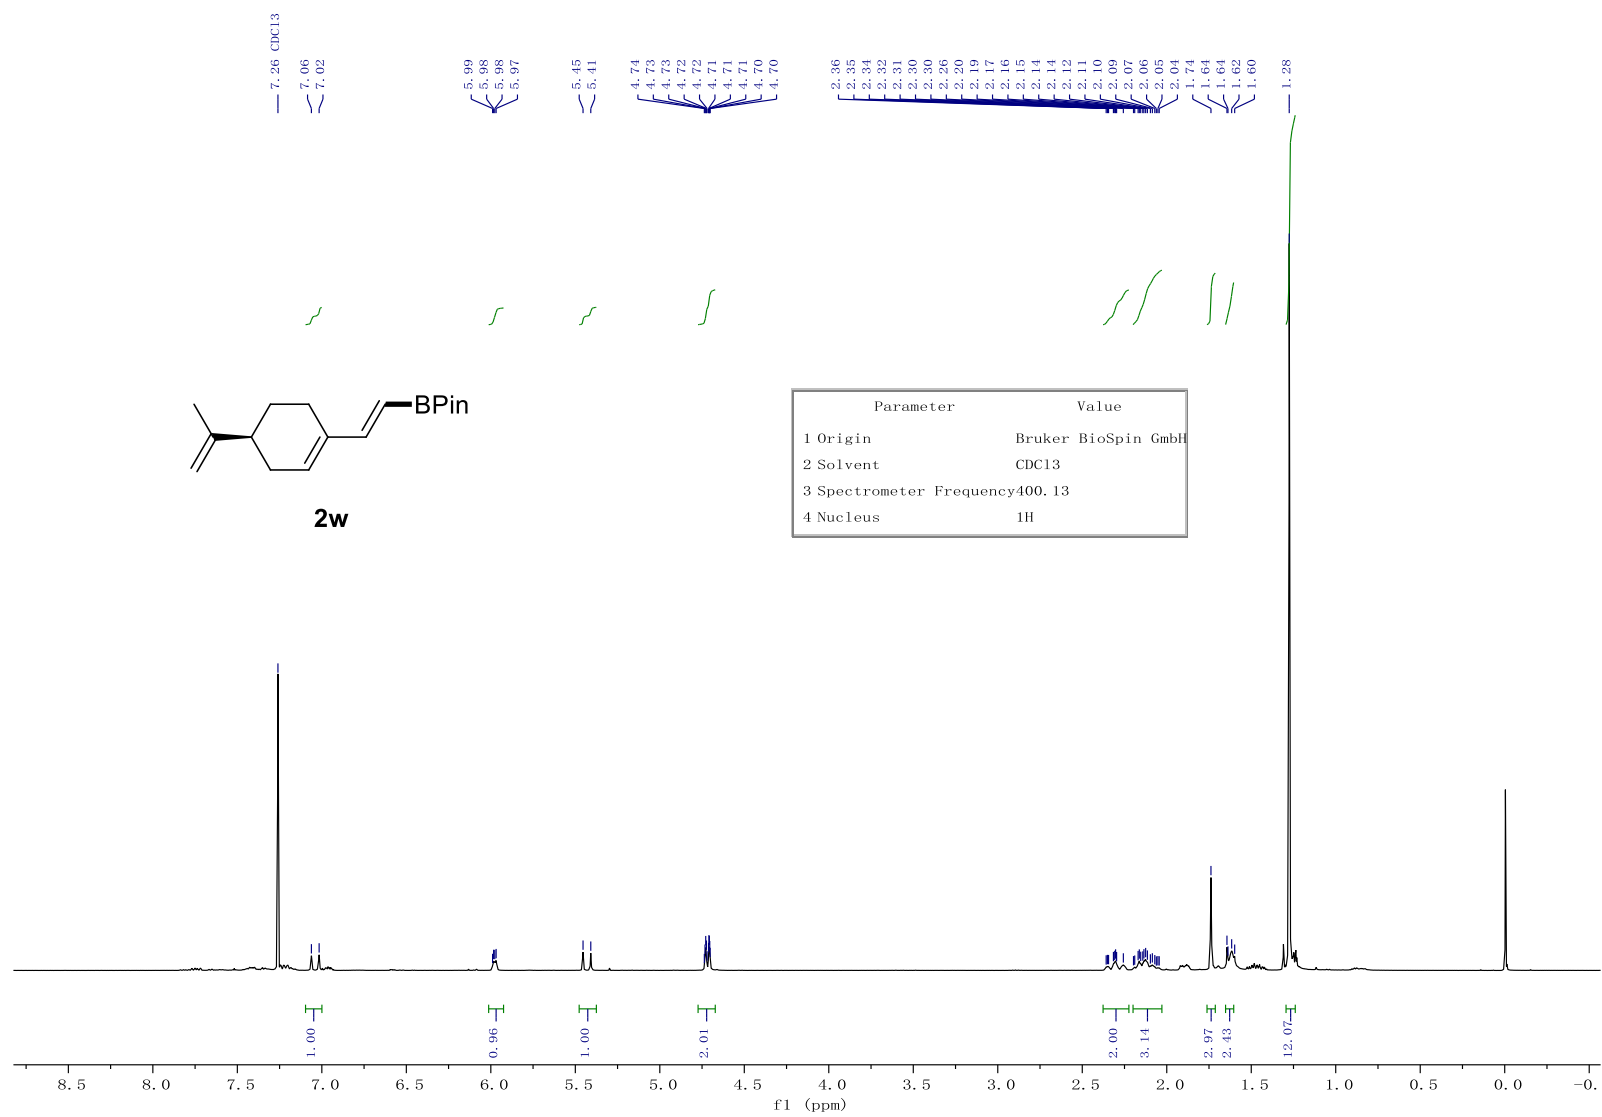

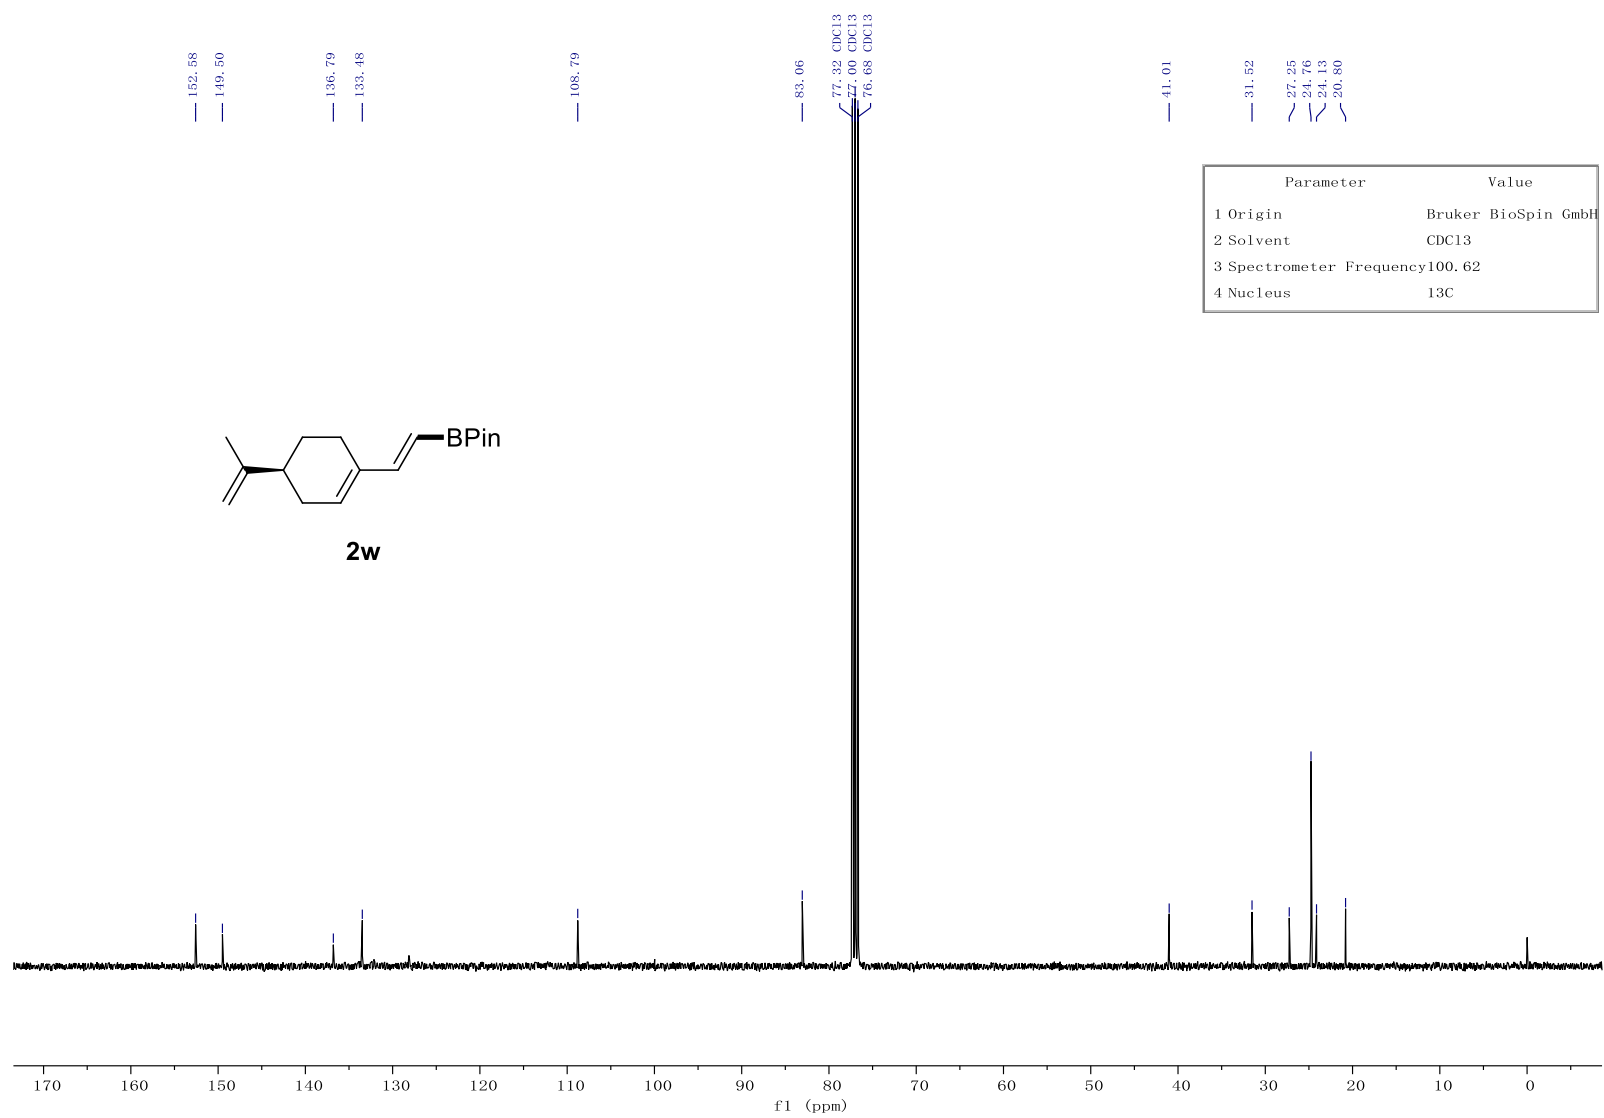

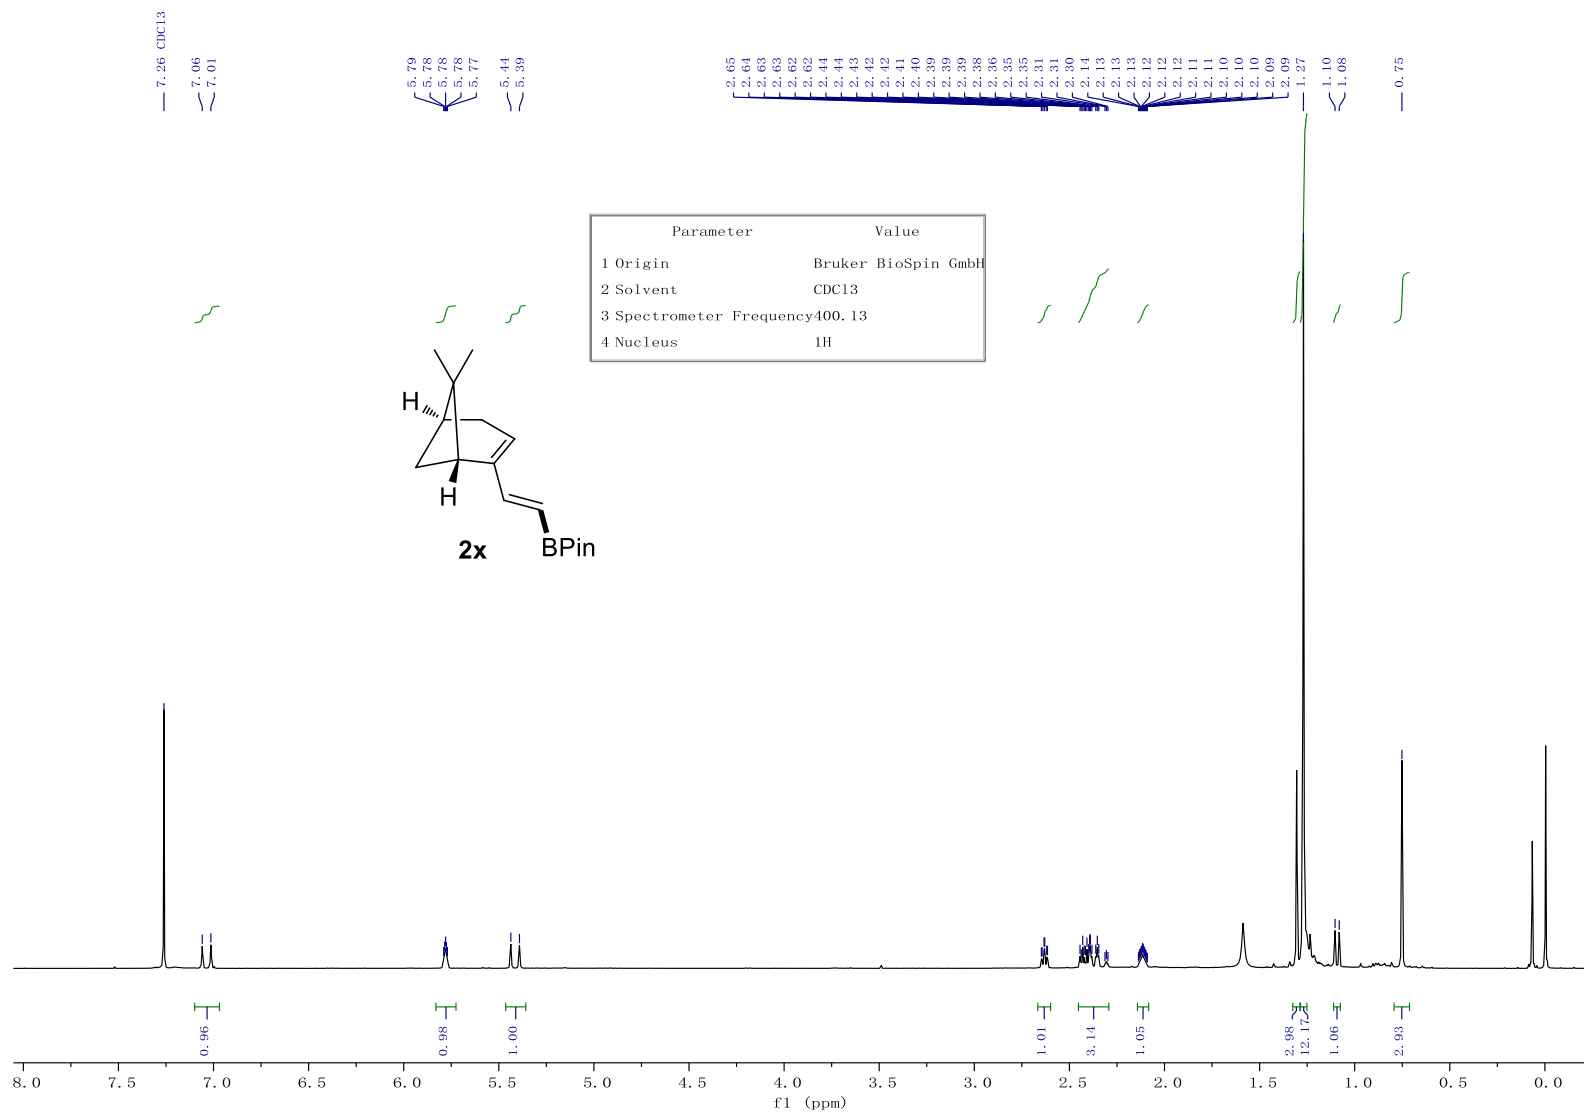

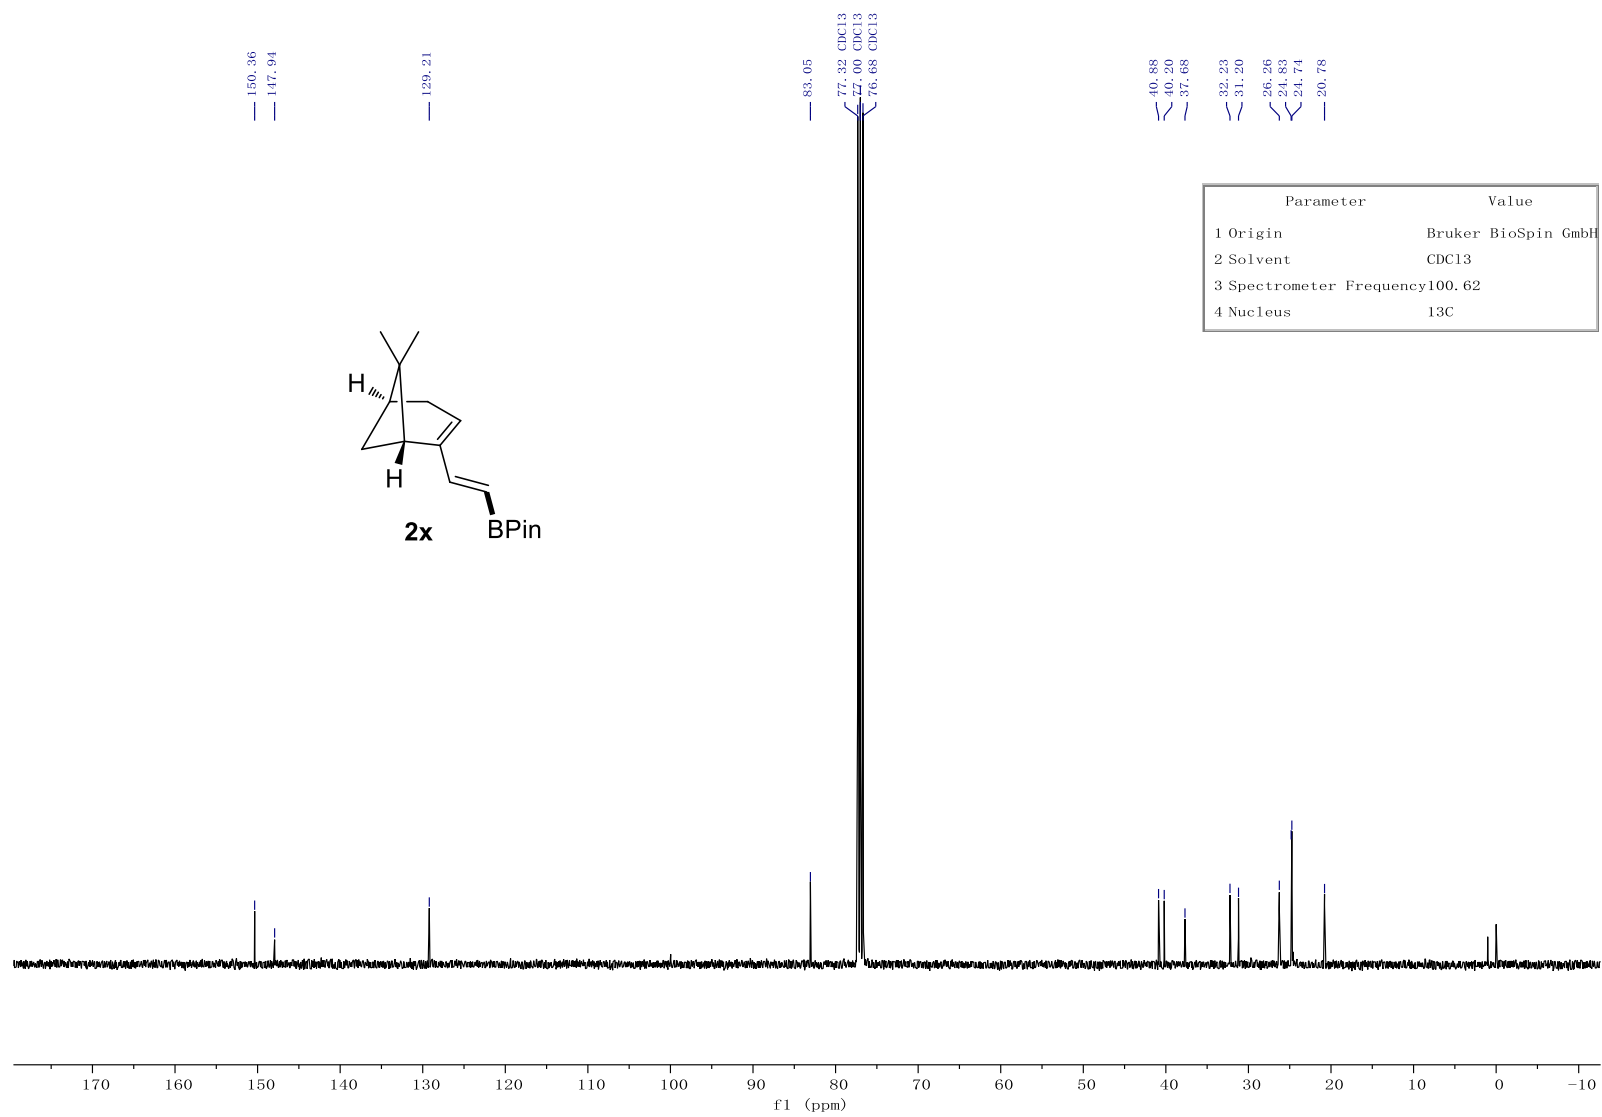

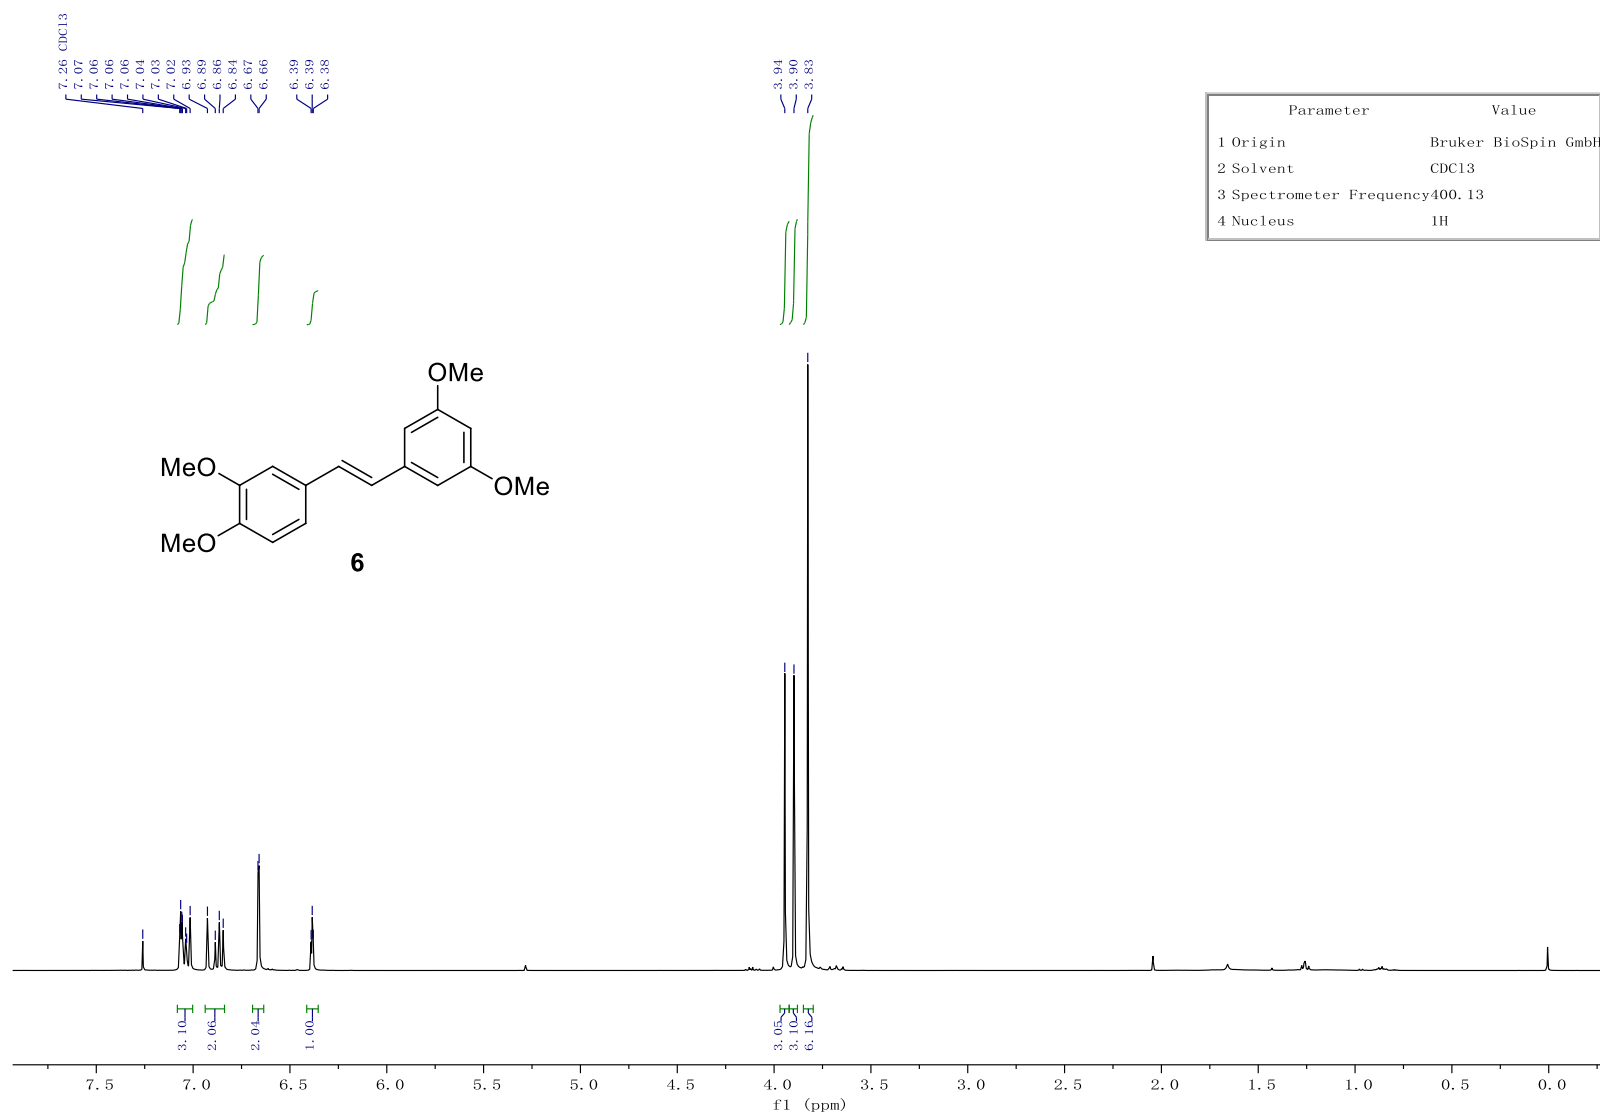



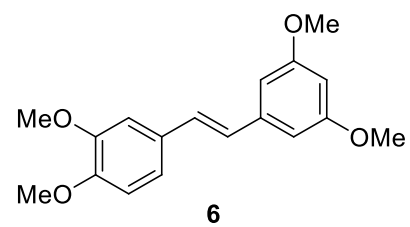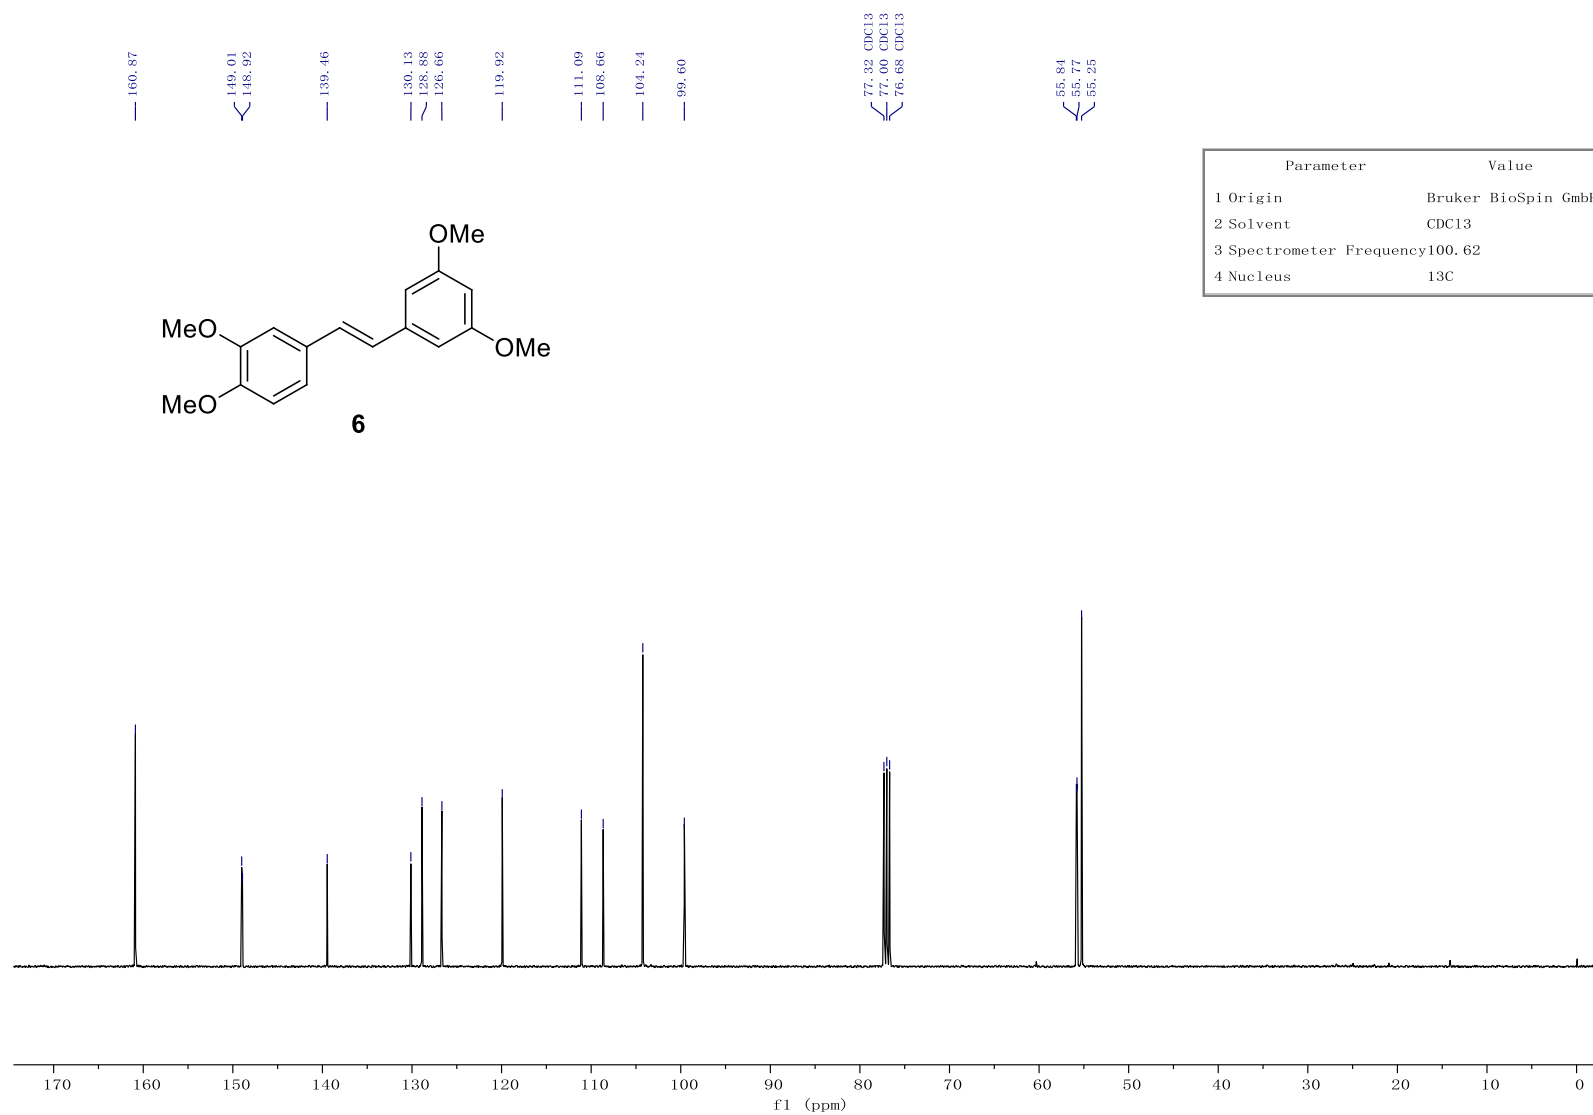

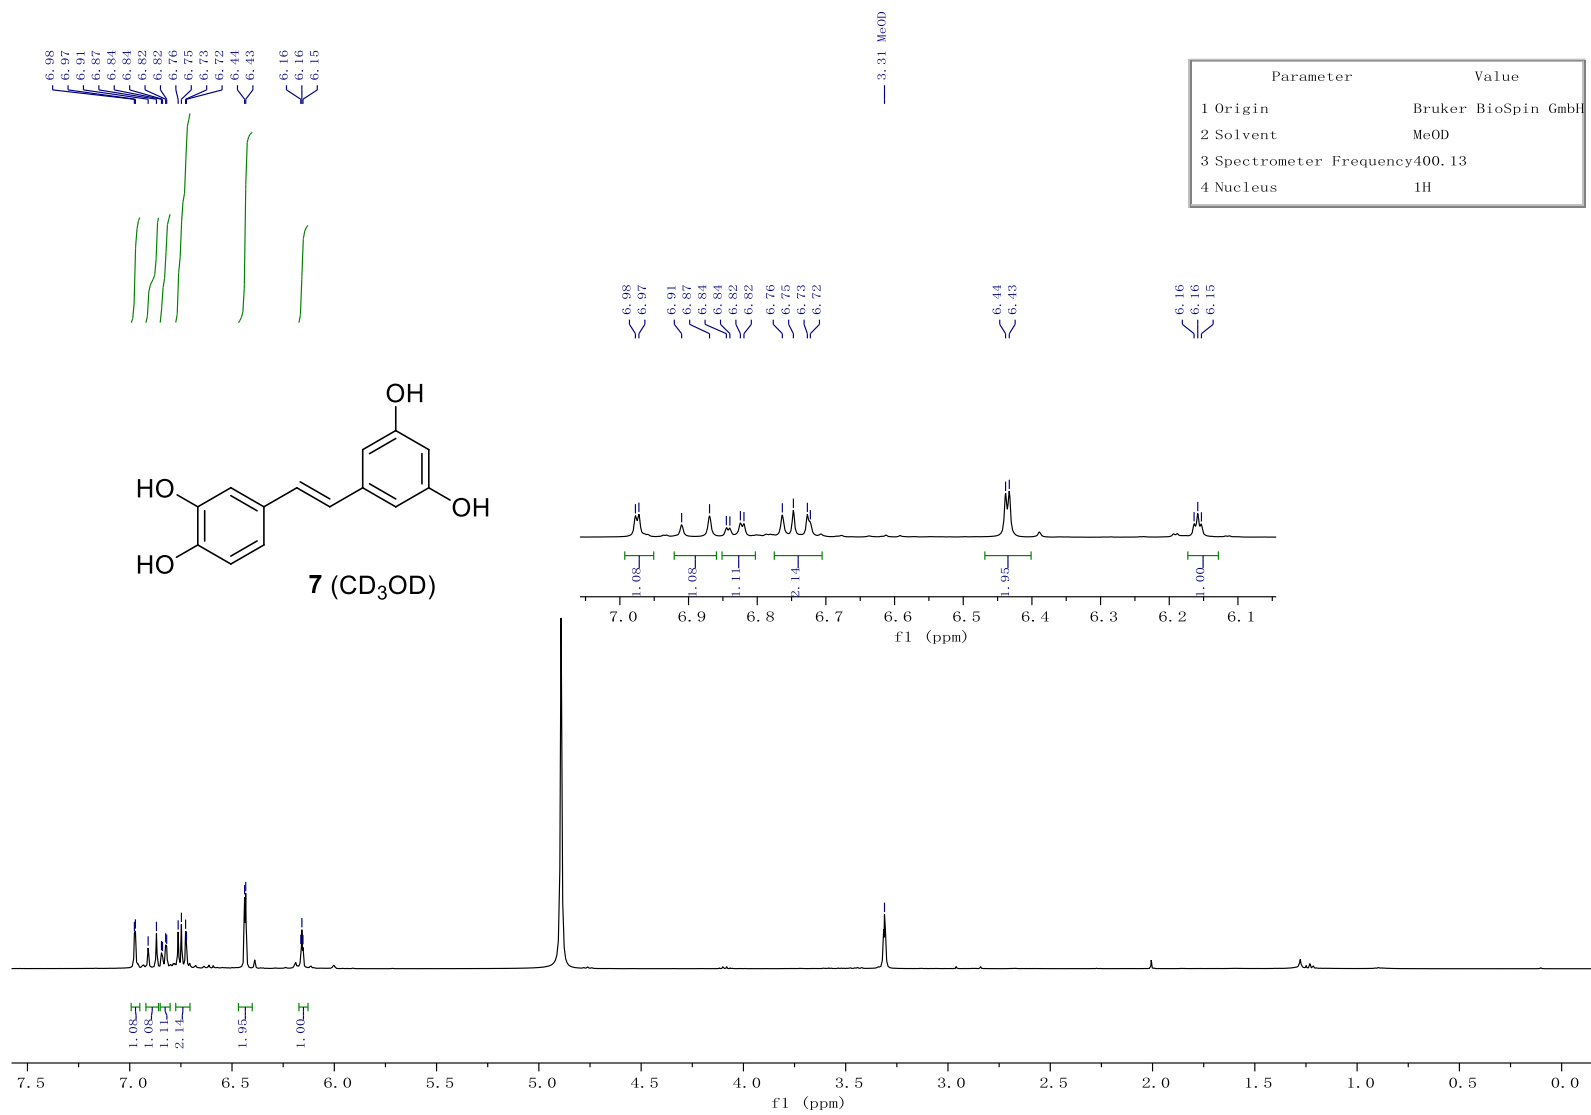

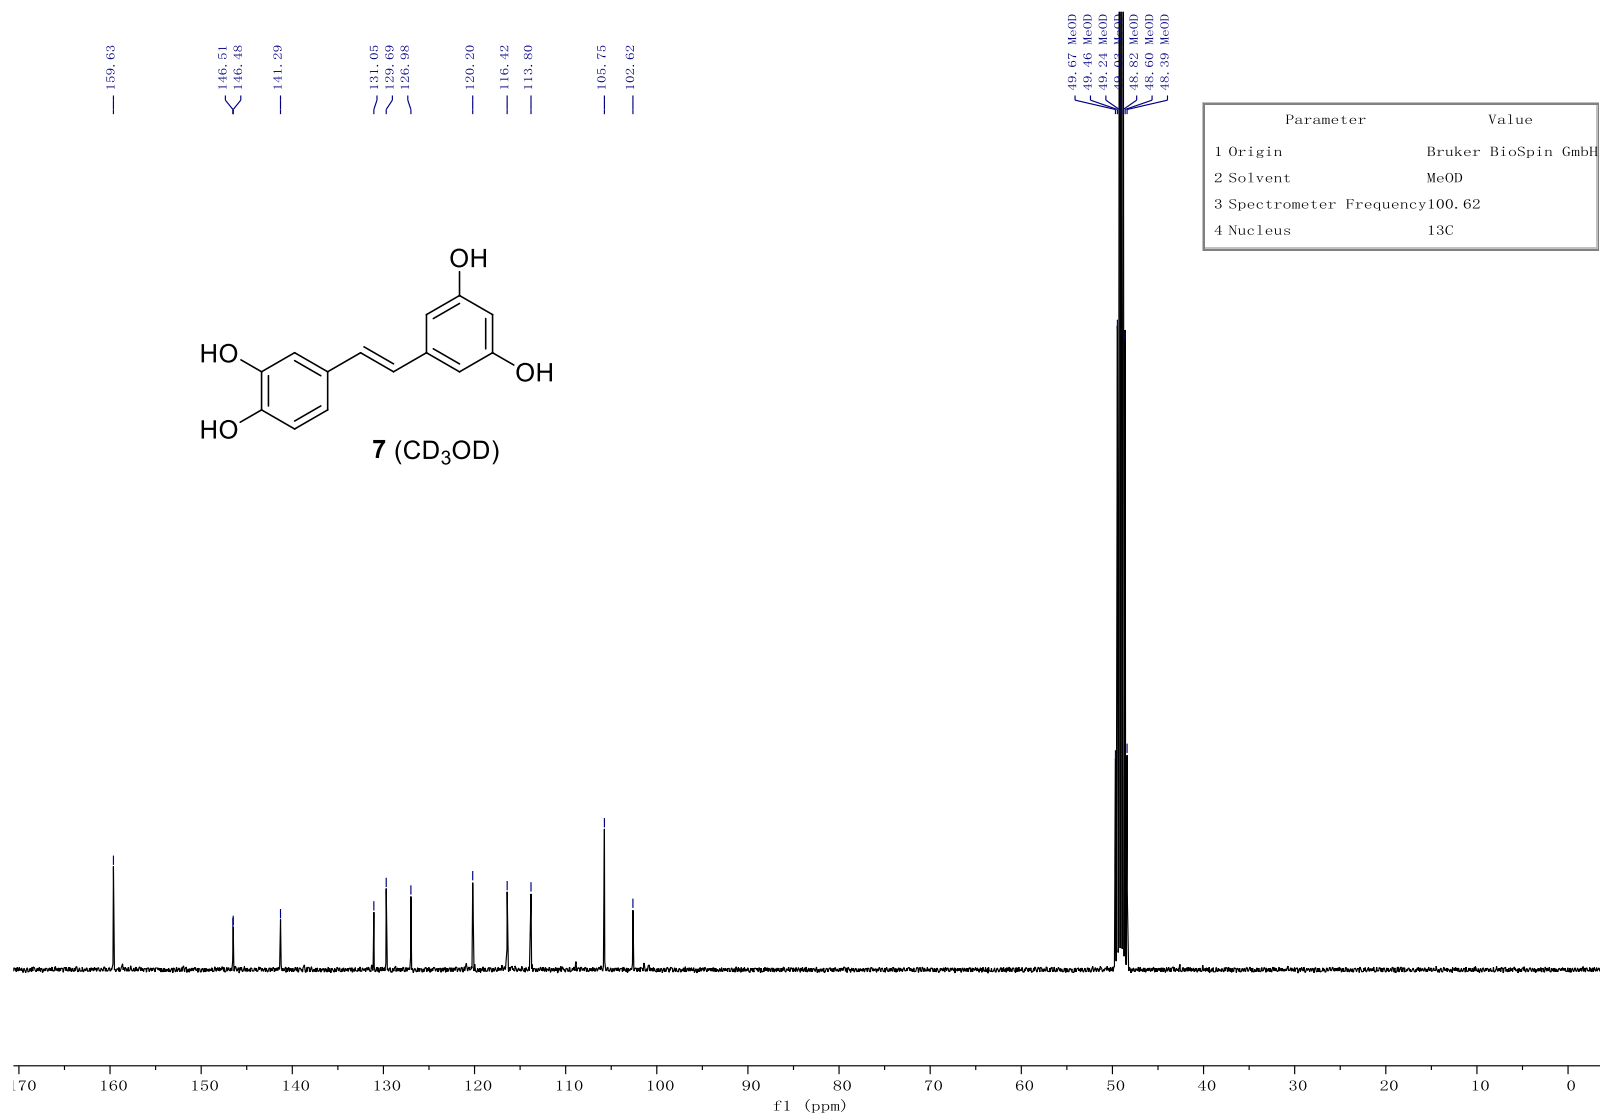

Supplement: Supplementary file 1 [file 24125867]
